# Supplementary material for: Development of di-arylated 1,2,4-triazole-based derivatives as therapeutic agents against breast cancer: synthesis and biological evaluation
Source: Royal Society of Chemistry journal article supplement (doi:10.1039/d4md00285g), 2024-01-01

## **SUPPORTING INFORMATION**

# **Development of di-arylated 1,2,4-triazole-based derivatives as therapeutic agents against breast cancer: synthesis and biological evaluation**

Mousumi Deb, <sup>a</sup> Hoshiyar Singh, <sup>b</sup> Diksha Manhas, <sup>c</sup> Utpal Nandi, <sup>c</sup> Santosh K Guru, <sup>b\*</sup>  
Parthasarathi Das, <sup>a\*</sup>

<sup>a</sup> Department of Chemistry and Chemical Biology, Indian Institute of Technology (Indian School of Mines) Dhanbad, Dhanbad-826004, India

<sup>b</sup> Department of Biological Sciences, NIPER Hyderabad, Hyderabad-500037, India

<sup>c</sup> Pharmacology division, CSIR-Indian Institute of Integrative Medicine, Jammu-180001, India; Current affiliation: Department of Chemical Sciences, Bose Institute, Unified Academic Campus, Kolkata-700091, India

E-mail: [partha@iitism.ac.in](mailto:partha@iitism.ac.in),  
[santoshkumar.guru@niperhyd.ac.in](mailto:santoshkumar.guru@niperhyd.ac.in)

## Table of Contents

|                                                                                    |   |
|------------------------------------------------------------------------------------|---|
| 1. X-ray crystallographic data analysis.....                                       | 3 |
| 2. $^1\text{H}$ , $^{13}\text{C}\{^1\text{H}\}$ , $^{19}\text{F}$ NMR Spectra..... | 7 |

## 1. X-ray Crystallographic Data Analysis

### a. X-ray data collection, structure solution, and refinement

A single crystal suitable for data collection was obtained by slowly evaporating compound **4n** from a solution of DMSO at 298 K. Diffraction intensities were collected on a single crystal with a SuperNova, Single source at offset/far, EosS2 diffractometer, with mirror-monochromated Mo- $K\alpha$  ( $\lambda = 0.71073 \text{ \AA}$ ) radiation at 293(2) K. The 'CrysAlisPro 1.171.40.69a' program was used for data reduction. Data were corrected for Lorentz and polarization effects; empirical absorption correction using spherical harmonics and frame scaling, implemented in SCALE3 ABSPACK scaling algorithm. The structures were solved with SHELXT and refined with the SHELXL-2018/3 package<sup>1-2</sup>, incorporated into the Olex2 1.5-alpha crystallographic collective package<sup>3a</sup>. The position of the hydrogen atoms was calculated by assuming ideal geometries and included in the last cycle of the refinement. All non-hydrogen atoms were refined with anisotropic thermal parameters by full-matrix least-squares minimization procedures on  $F^2$ .

The Perspective view of **4t** and the data collection and structure refinement details are in **Figures S1** and **Table S1** respectively.

CCDC-number 2320548 (**4t**) contains supplementary crystallographic data for this paper. These data can be obtained free of charge from The Cambridge Crystallographic Data Centre via [www.ccdc.cam.ac.uk/data\\_request/cif](http://www.ccdc.cam.ac.uk/data_request/cif) or by emailing [data\\_request@ccdc.cam.ac.uk](mailto:data_request@ccdc.cam.ac.uk), or by contacting The Cambridge Crystallographic Data Centre, 12 Union Road, Cambridge CB2 1EZ, UK; fax: +44 1223 336033.

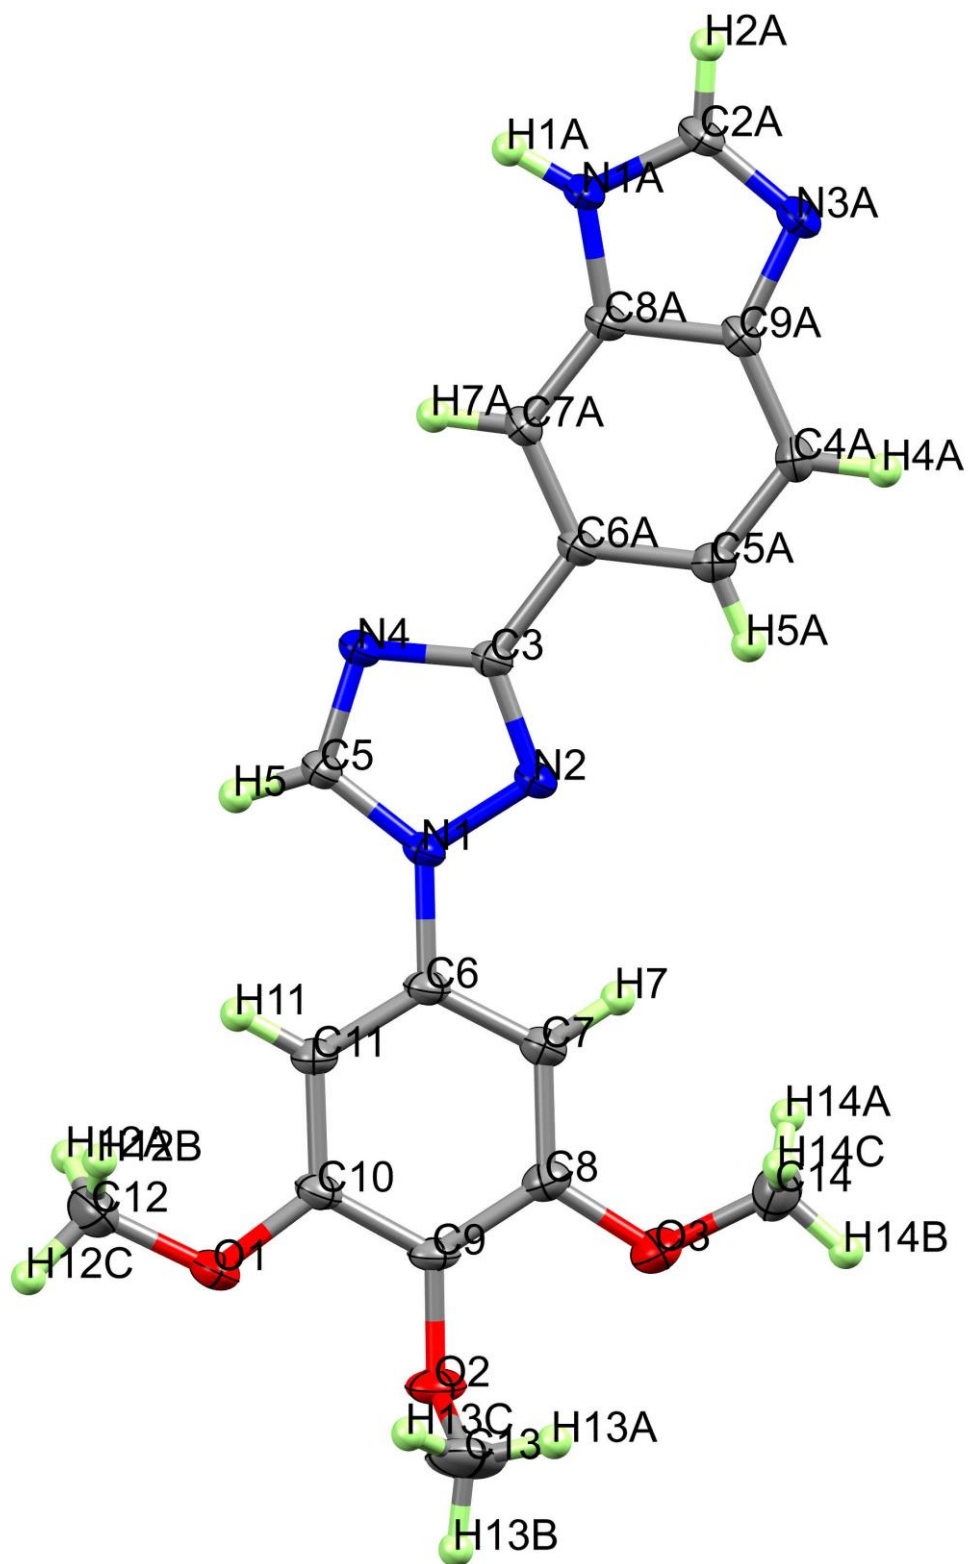

**Figure S1:** Perspective view of **4t** with thermal 30% ellipsoid probability

**Table S1.** Data collection and structure refinement parameters for compound **4t**

| Parameters                                                                                               | 4t                                                                                          |
|----------------------------------------------------------------------------------------------------------|---------------------------------------------------------------------------------------------|
| Empirical formula                                                                                        | C <sub>18</sub> H <sub>17</sub> N <sub>5</sub> O <sub>3</sub>                               |
| Formula weight                                                                                           | 351.36                                                                                      |
| Crystal color, habit                                                                                     | White, cubic                                                                                |
| Temperature (K)                                                                                          | 293(2)                                                                                      |
| Wavelength (Å)                                                                                           | 0.71073                                                                                     |
| Crystal system                                                                                           | monoclinic                                                                                  |
| Space group                                                                                              | P2 <sub>1</sub> /n (no. 14)                                                                 |
| Crystal size (mm <sup>3</sup> )                                                                          | 0.2 x 0.2 x 0.2                                                                             |
| <i>a</i> (Å)                                                                                             | 13.0154(5)                                                                                  |
| <i>b</i> (Å)                                                                                             | 6.8065(2)                                                                                   |
| <i>c</i> (Å)                                                                                             | 20.5824(6)                                                                                  |
| $\alpha$ (°)                                                                                             | 90                                                                                          |
| $\beta$ (°)                                                                                              | 105.958(3)                                                                                  |
| $\gamma$ (°)                                                                                             | 90                                                                                          |
| <i>V</i> (Å <sup>3</sup> )                                                                               | 1752.88(10)                                                                                 |
| <i>Z</i>                                                                                                 | 4                                                                                           |
| <i>D</i> <sub>calc</sub><br>(g cm <sup>-3</sup> )                                                        | 1.331                                                                                       |
| $\mu$ (mm <sup>-1</sup> )                                                                                | 0.094                                                                                       |
| no. reflections collected                                                                                | 8558                                                                                        |
| no. unique reflection                                                                                    | 3996 ( <i>R</i> <sub>int</sub> = 0.0258)                                                    |
| no. reflections used [ <i>I</i> > 2σ( <i>I</i> )]                                                        | 2438                                                                                        |
| <i>R</i> <sub>1</sub> <sup>a</sup> , <i>wR</i> <sub>2</sub> <sup>b</sup><br>[ <i>I</i> > 2σ( <i>I</i> )] | <i>R</i> <sub>1</sub> = 0.0480 <sup>a</sup><br><i>wR</i> <sub>2</sub> = 0.0999 <sup>b</sup> |
| <i>R</i> <sub>1</sub> <sup>a</sup> , <i>wR</i> <sub>2</sub> <sup>b</sup><br>(All data)                   | <i>R</i> <sub>1</sub> = 0.0897 <sup>a</sup><br><i>wR</i> <sub>2</sub> = 0.1128 <sup>b</sup> |
| Goodness-of-fit on <i>F</i> <sup>2</sup>                                                                 | 0.931                                                                                       |

$$^a R_1 = \frac{\sum ||F_o| - |F_c||}{\sum |F_o|}, \quad ^b wR_2 = \left\{ \frac{\sum [w (|F_o|^2 - |F_c|^2)^2]}{\sum [w (|F_o|^2)^2]} \right\}^{1/2}.$$

**b. References:**

1. G.M. Sheldrick, SHELXL–2016, Program for Crystal Structure Refinement University of Göttingen, Göttingen, Germany, 2014.
2. G.M. Sheldrick, *Acta Crystallogr. Sect. C: Cryst. Struct. Commun.* C71 (2015) 3–8.
3. O.V. Dolomanov, L.J. Bourhis, R.J. Gildea, J.A.K. Howard, H. Puschmann, *J. Appl. Cryst.* 42 (2009) 339–341.

## 2. $^1\text{H}$ , $^{13}\text{C}\{^1\text{H}\}$ , $^{19}\text{F}$ NMR Spectra:

### $^1\text{H}$ NMR (400 MHz, $\text{CDCl}_3$ ) of 3-bromo-1-phenyl-1*H*-1,2,4-triazole (3a):

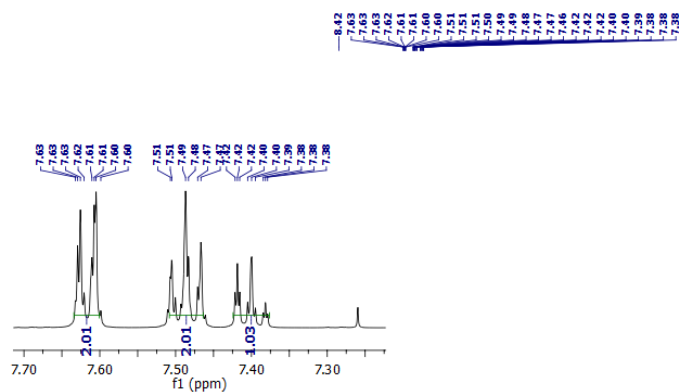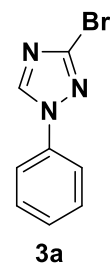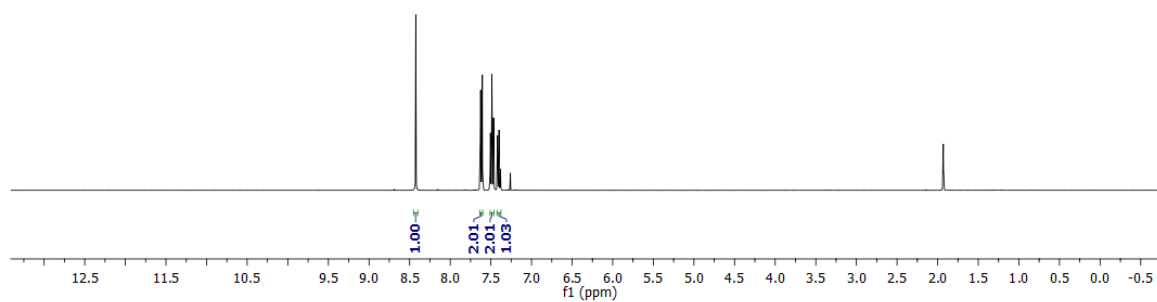

### $^{13}\text{C}\{^1\text{H}\}$ NMR (101 MHz, $\text{CDCl}_3$ ) of 3-bromo-1-phenyl-1*H*-1,2,4-triazole (3a):

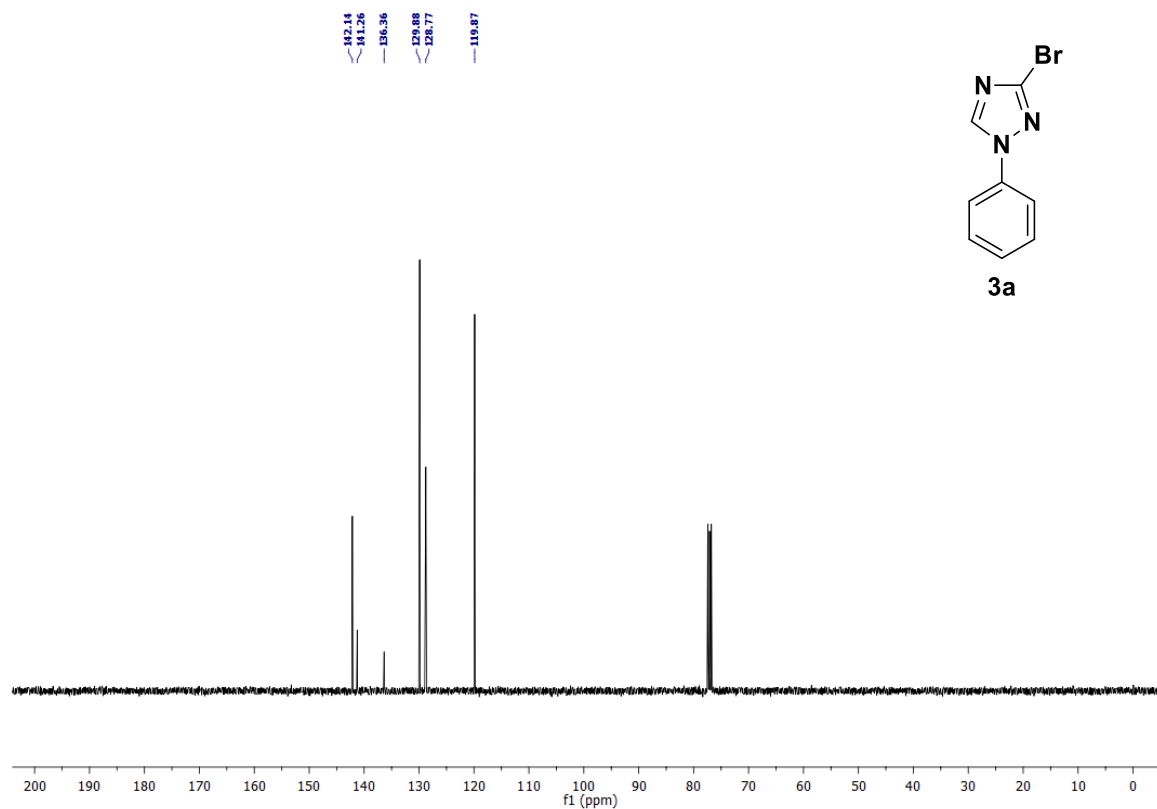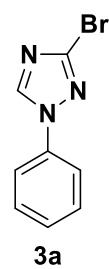

**<sup>1</sup>H NMR (400 MHz, CDCl<sub>3</sub>) of 3-bromo-1-(4-methoxyphenyl)-1*H*-1,2,4-triazole (3b):**

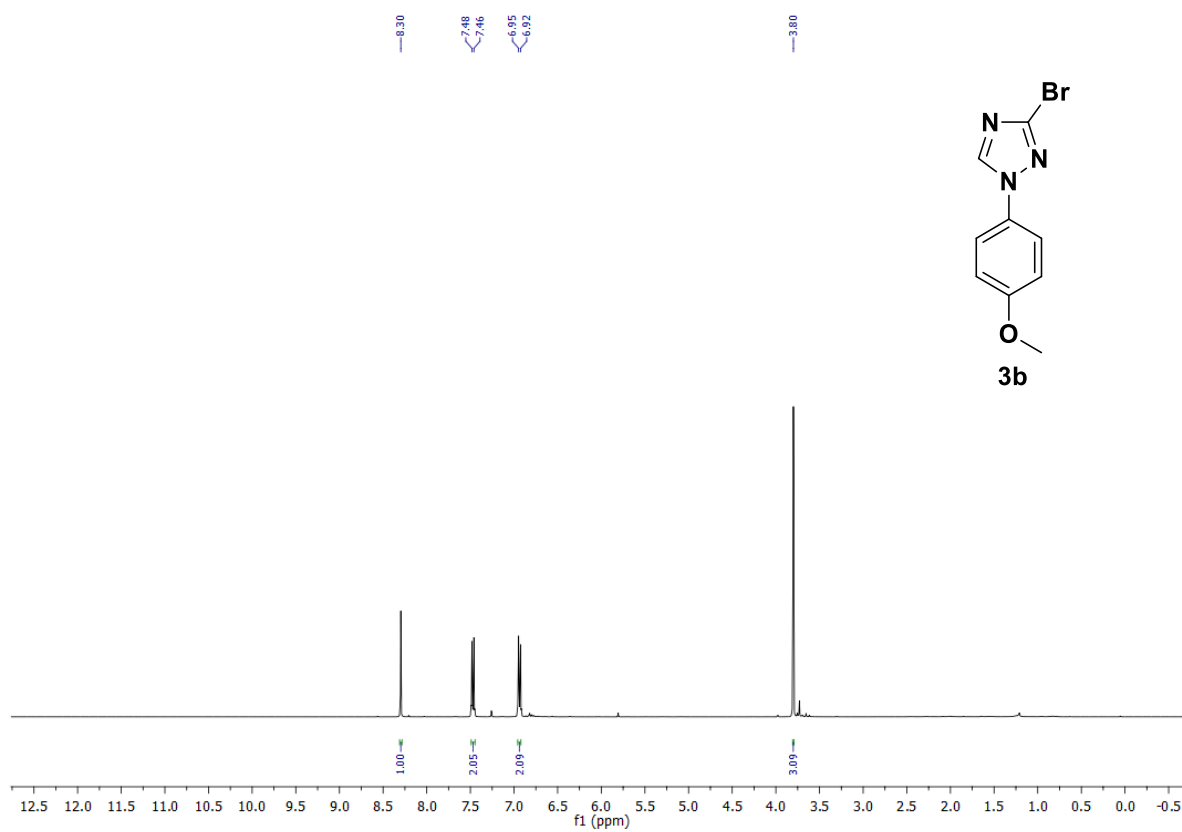

**<sup>13</sup>C{<sup>1</sup>H} NMR (101 MHz, CDCl<sub>3</sub>) of 3-bromo-1-(4-methoxyphenyl)-1*H*-1,2,4-triazole (3b):**

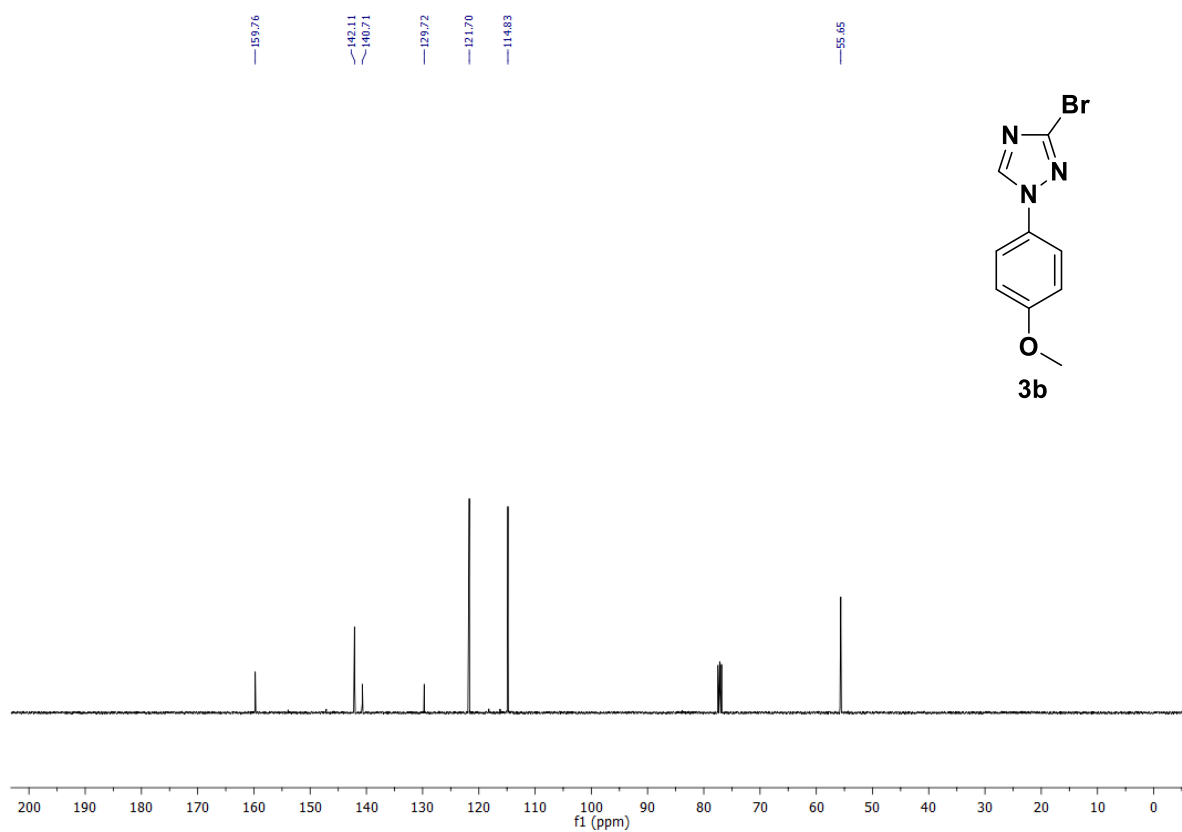



**<sup>1</sup>H NMR (400 MHz, CDCl<sub>3</sub>) of 3-bromo-1-(3-methoxyphenyl)-1*H*-1,2,4-triazole (3c):**

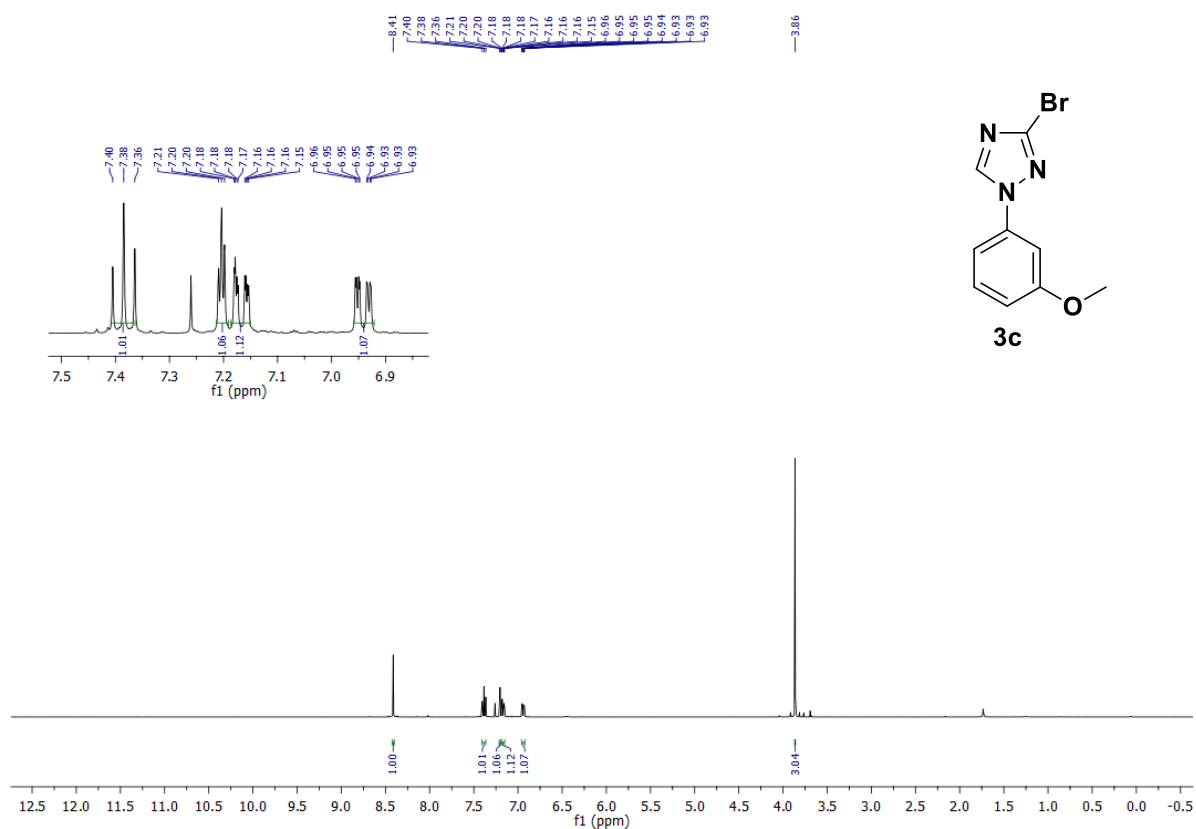

**<sup>13</sup>C{<sup>1</sup>H} NMR (101 MHz, CDCl<sub>3</sub>) of 3-bromo-1-(3-methoxyphenyl)-1*H*-1,2,4-triazole (3c):**

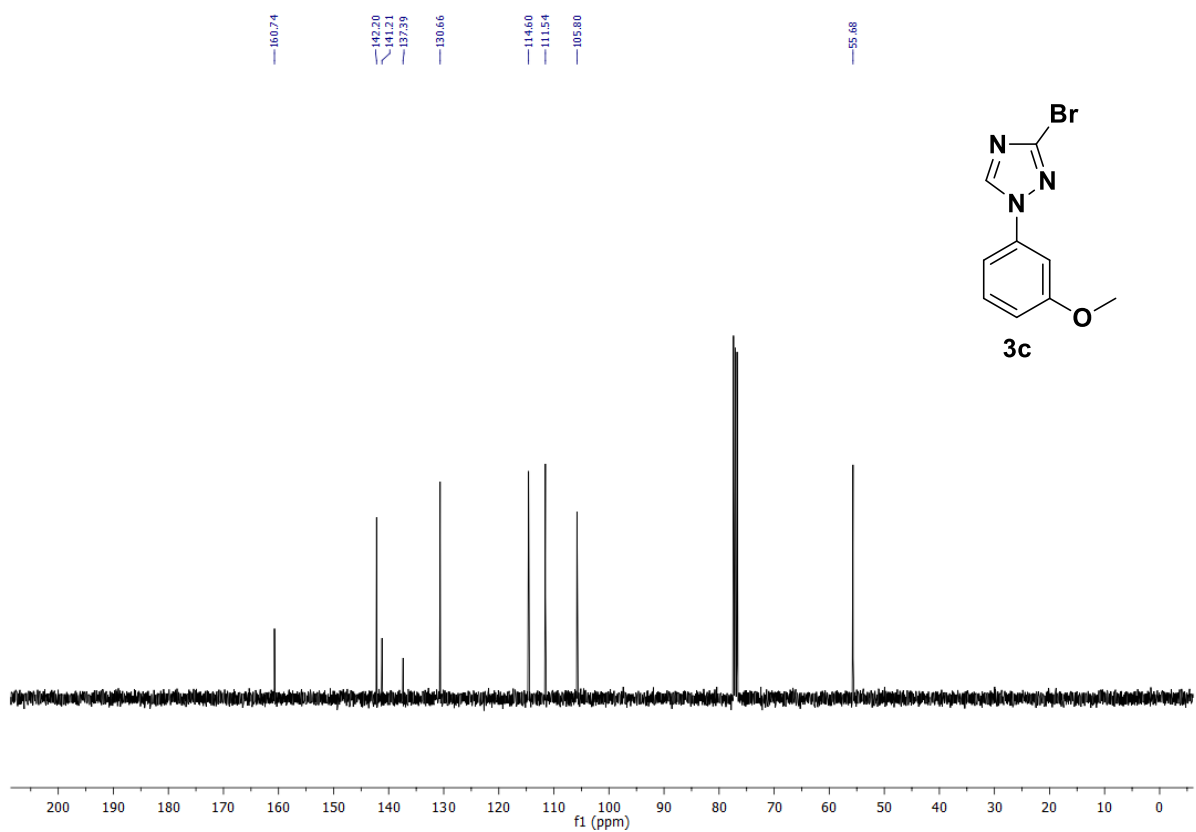

**<sup>1</sup>H NMR (400 MHz, CDCl<sub>3</sub>) of 3-(3-bromo-1*H*-1,2,4-triazol-1-yl)aniline (3d):**

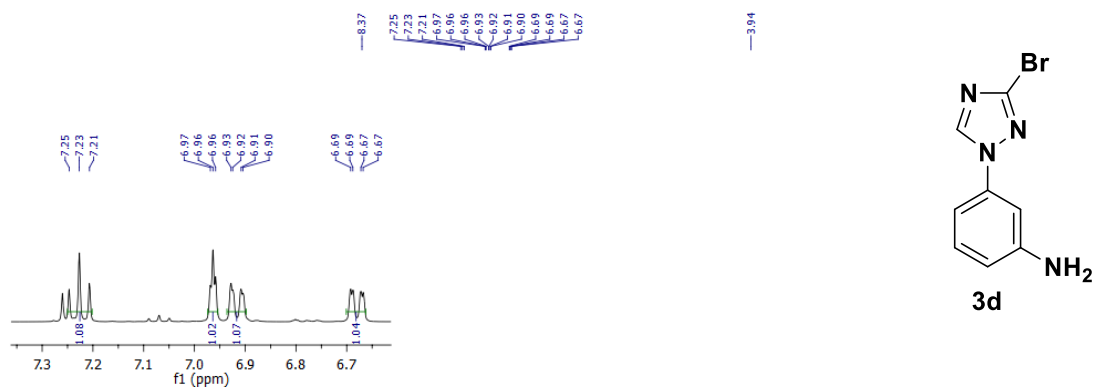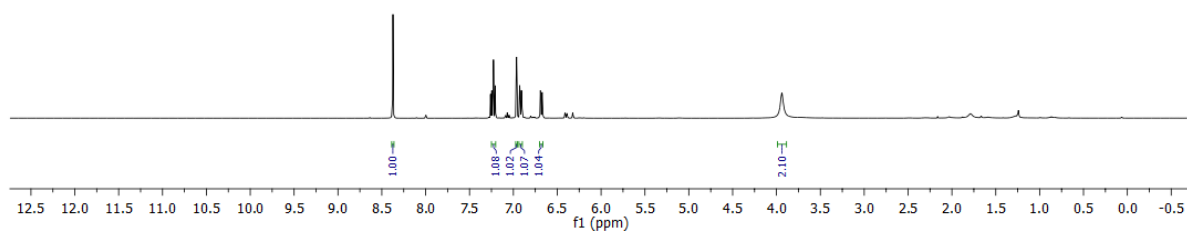

**<sup>13</sup>C{<sup>1</sup>H} NMR (101 MHz, CDCl<sub>3</sub>) of 3-(3-bromo-1*H*-1,2,4-triazol-1-yl)aniline (3d):**

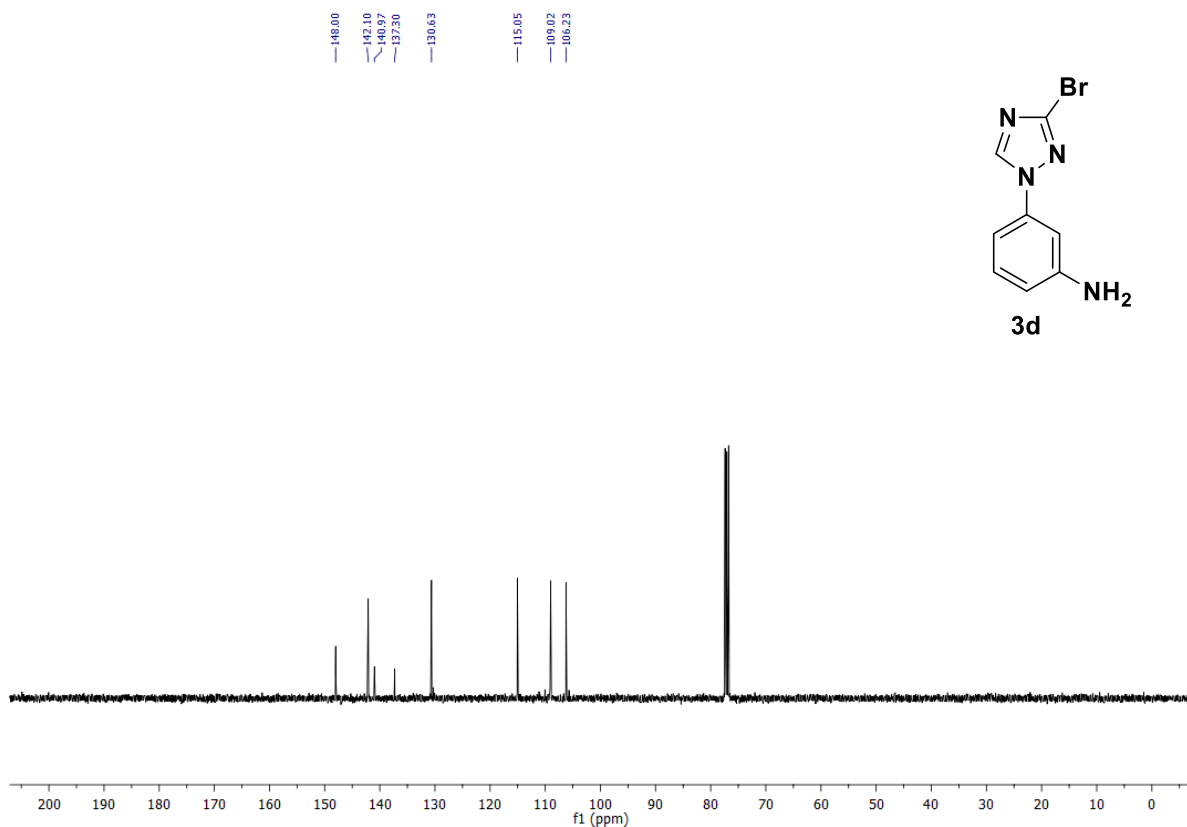

**<sup>1</sup>H NMR (400 MHz, CDCl<sub>3</sub>) of 3-bromo-1-(4-fluorophenyl)-1*H*-1,2,4-triazole (3e):**

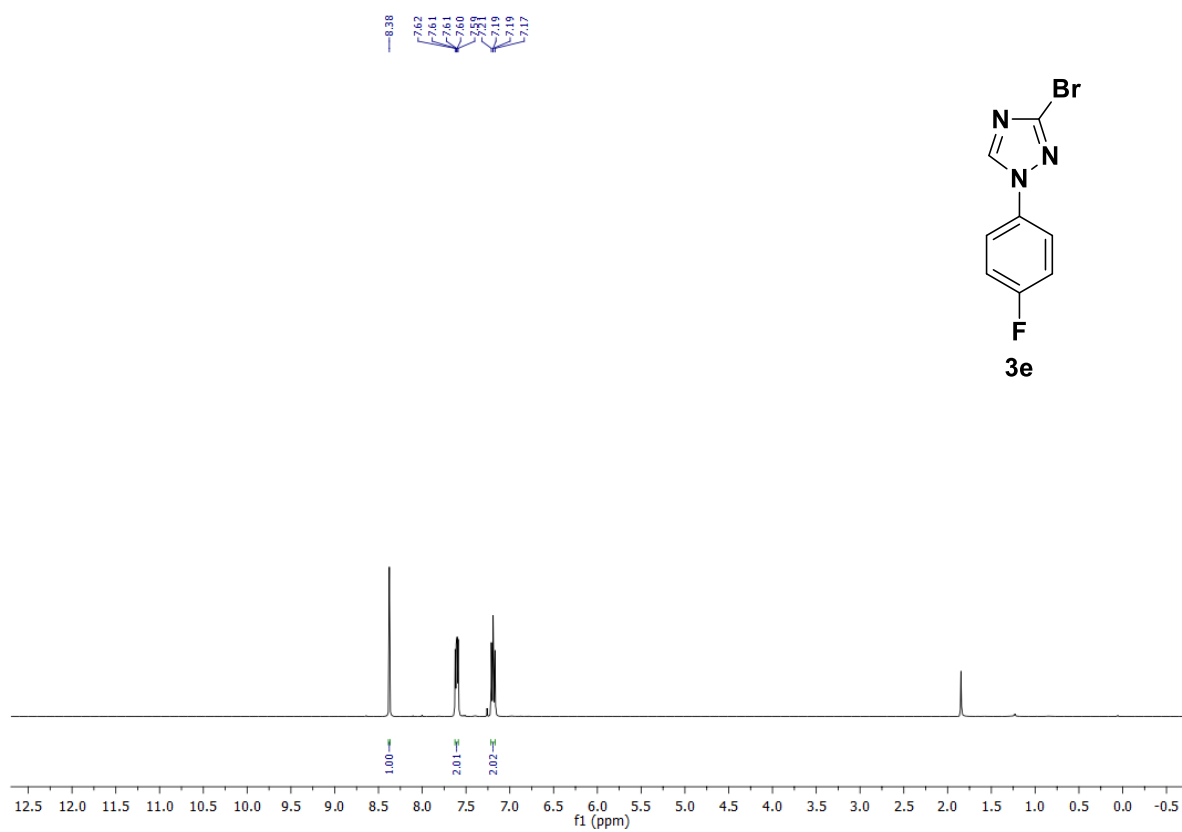

**<sup>13</sup>C{<sup>1</sup>H} NMR (101 MHz, CDCl<sub>3</sub>) of 3-bromo-1-(4-fluorophenyl)-1*H*-1,2,4-triazole (3e):**

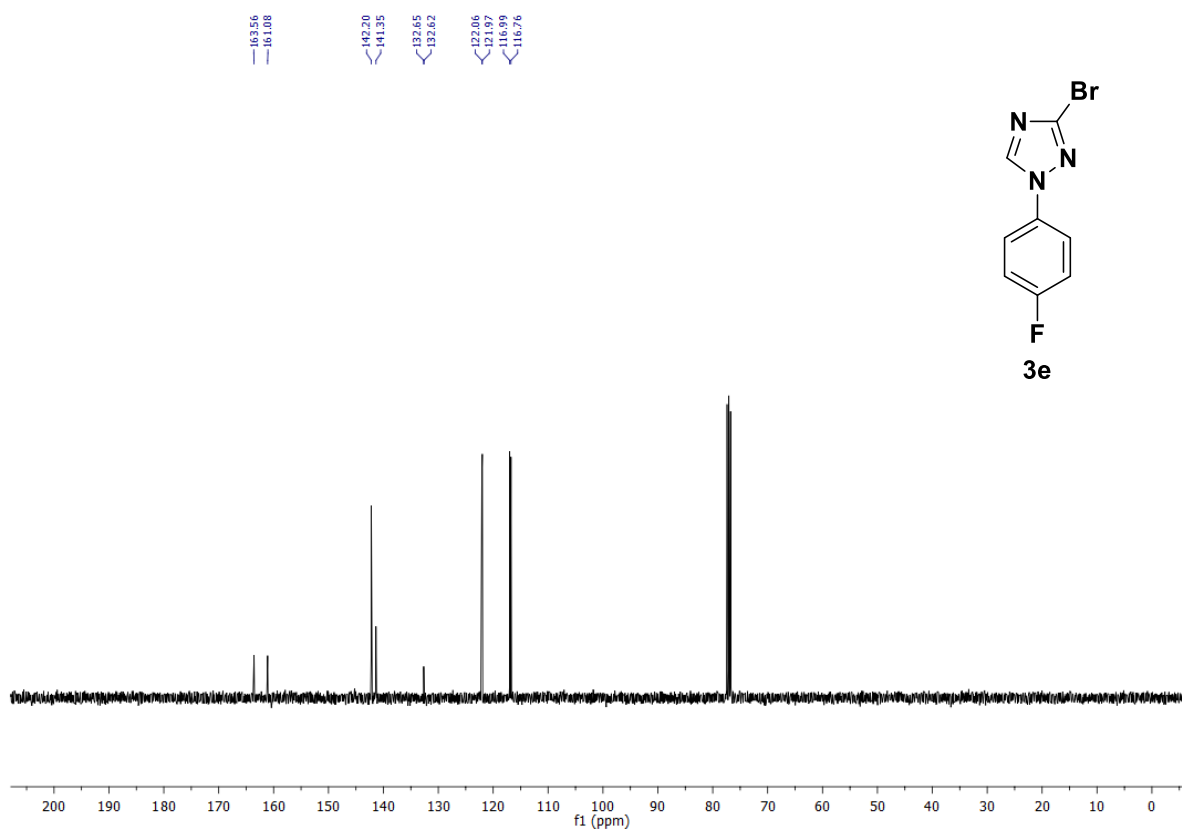

**<sup>19</sup>F NMR (377 MHz, CDCl<sub>3</sub>) of 3-bromo-1-(4-fluorophenyl)-1*H*-1,2,4-triazole (3e):**

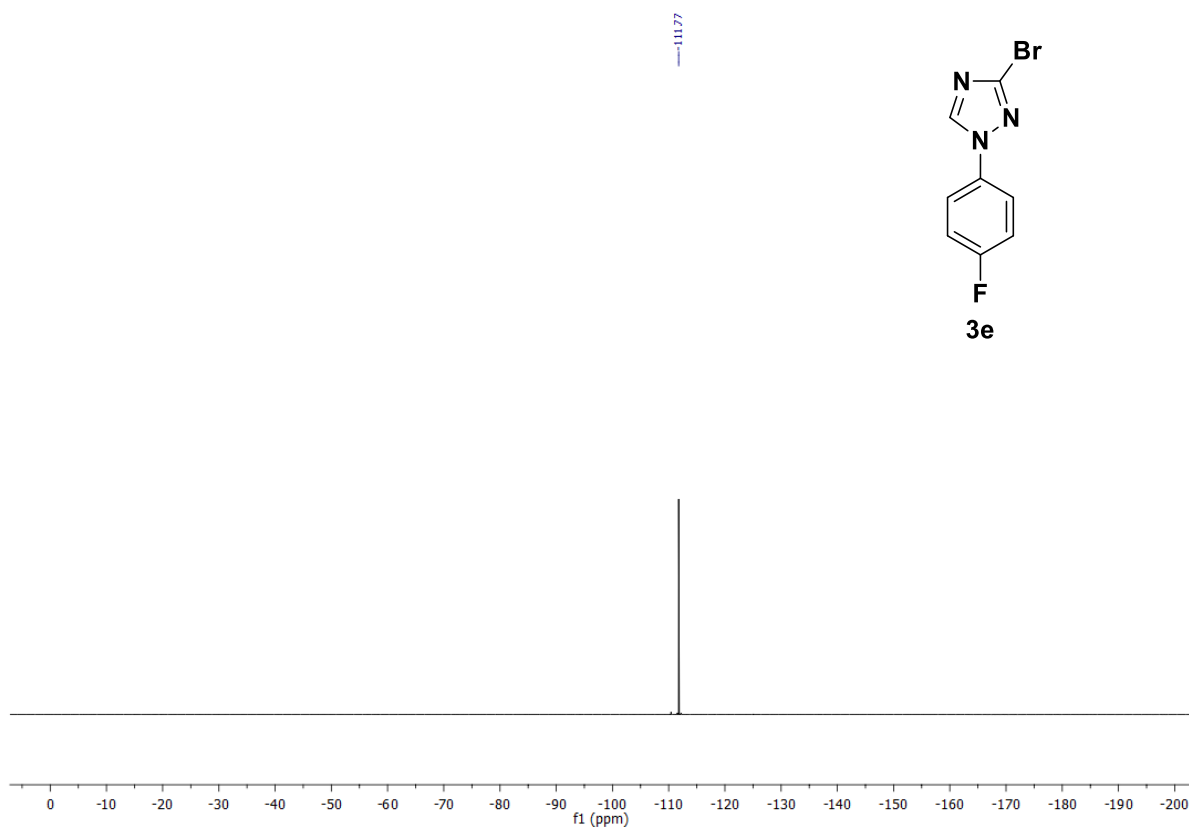

**<sup>1</sup>H NMR (400 MHz, CDCl<sub>3</sub>) of 3-bromo-1-(4-chlorophenyl)-1*H*-1,2,4-triazole (3f):**

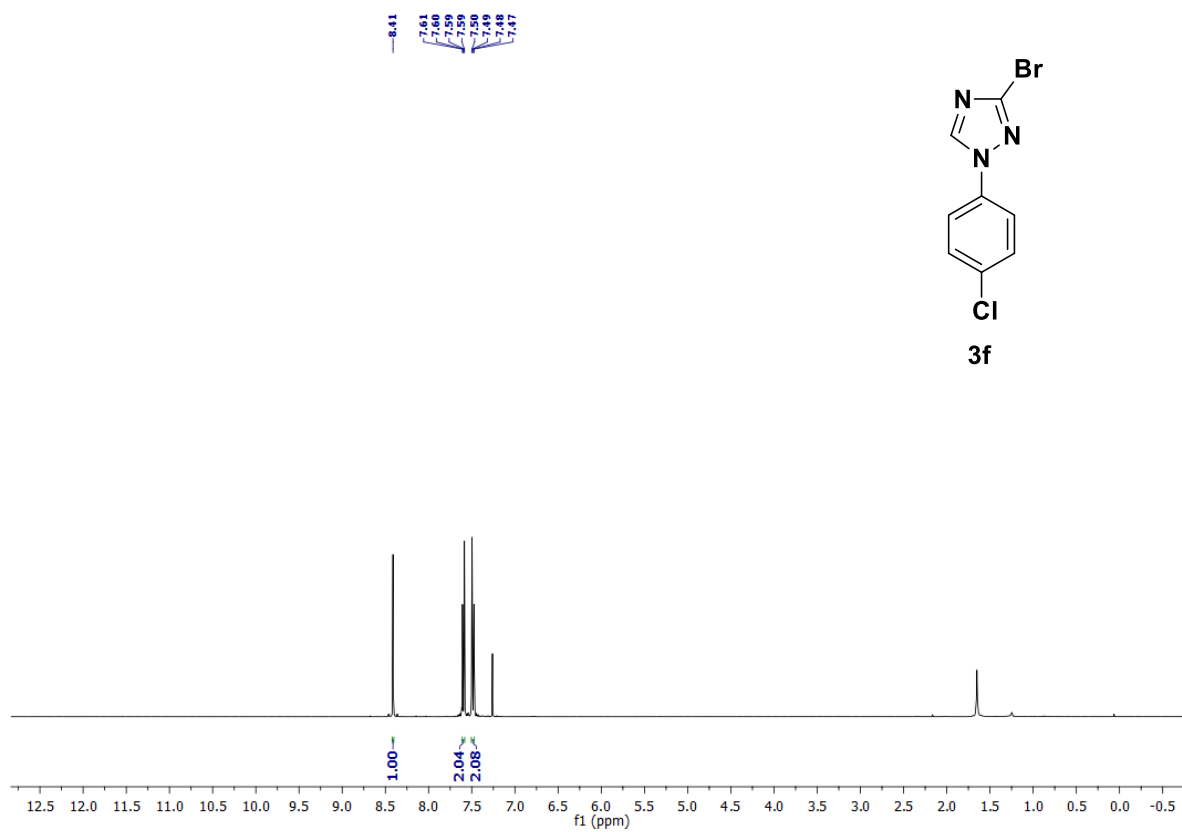

**<sup>13</sup>C{<sup>1</sup>H} NMR (101 MHz, CDCl<sub>3</sub>) of 3-bromo-1-(4-chlorophenyl)-1*H*-1,2,4-triazole (3f):**

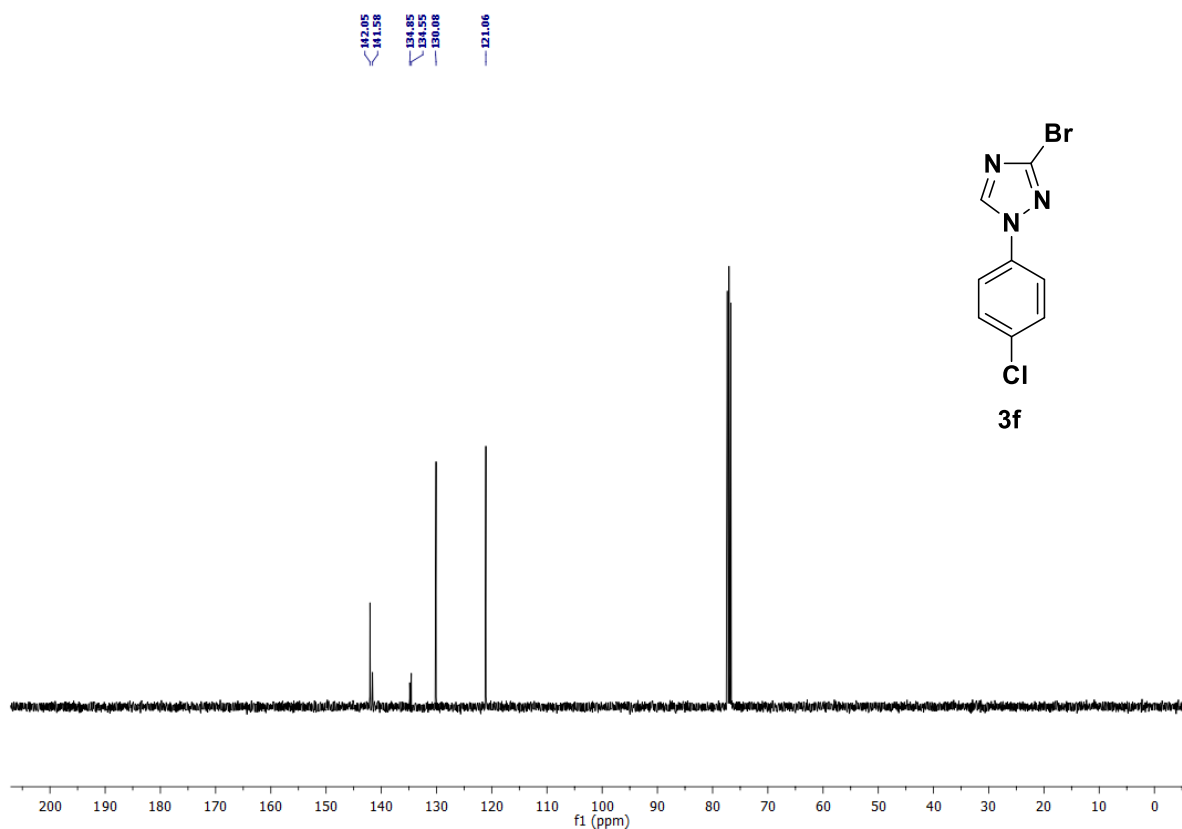

**$^1\text{H}$  NMR (400 MHz,  $\text{CDCl}_3$ ) of 3-bromo-1-(4-bromophenyl)-1H-1,2,4-triazole (3g):**

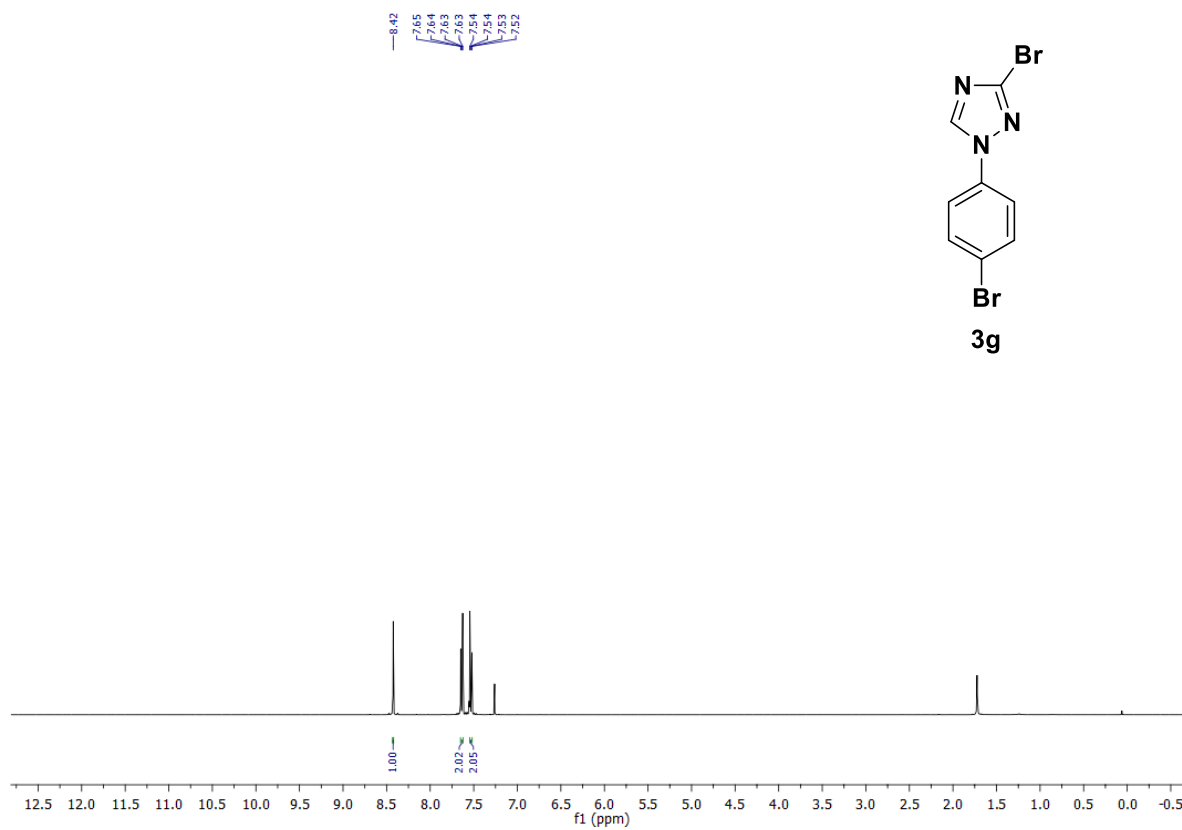

**$^{13}\text{C}\{^1\text{H}\}$  NMR (101 MHz,  $\text{CDCl}_3$ ) of 3-bromo-1-(4-bromophenyl)-1H-1,2,4-triazole (3g):**

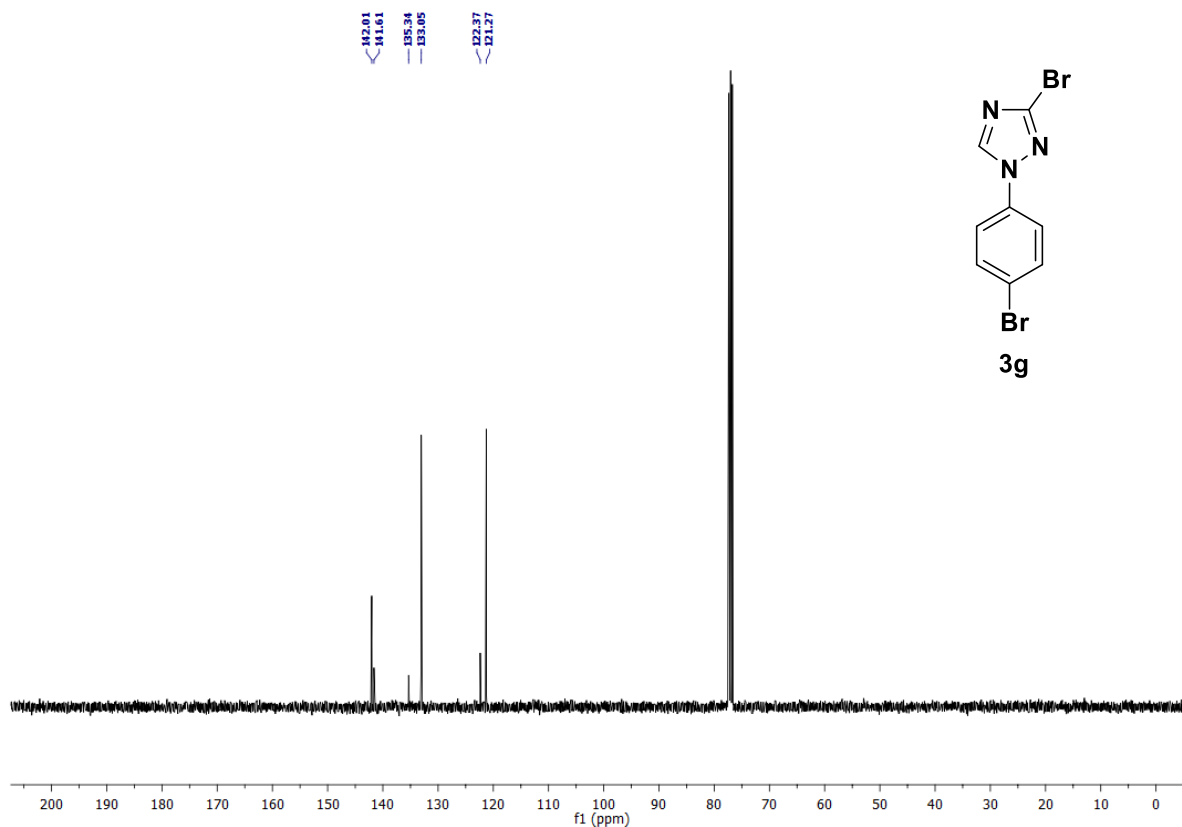

**<sup>1</sup>H NMR (400 MHz, CDCl<sub>3</sub>) of 4-(3-bromo-1*H*-1,2,4-triazol-1-yl)benzonitrile (3h):**

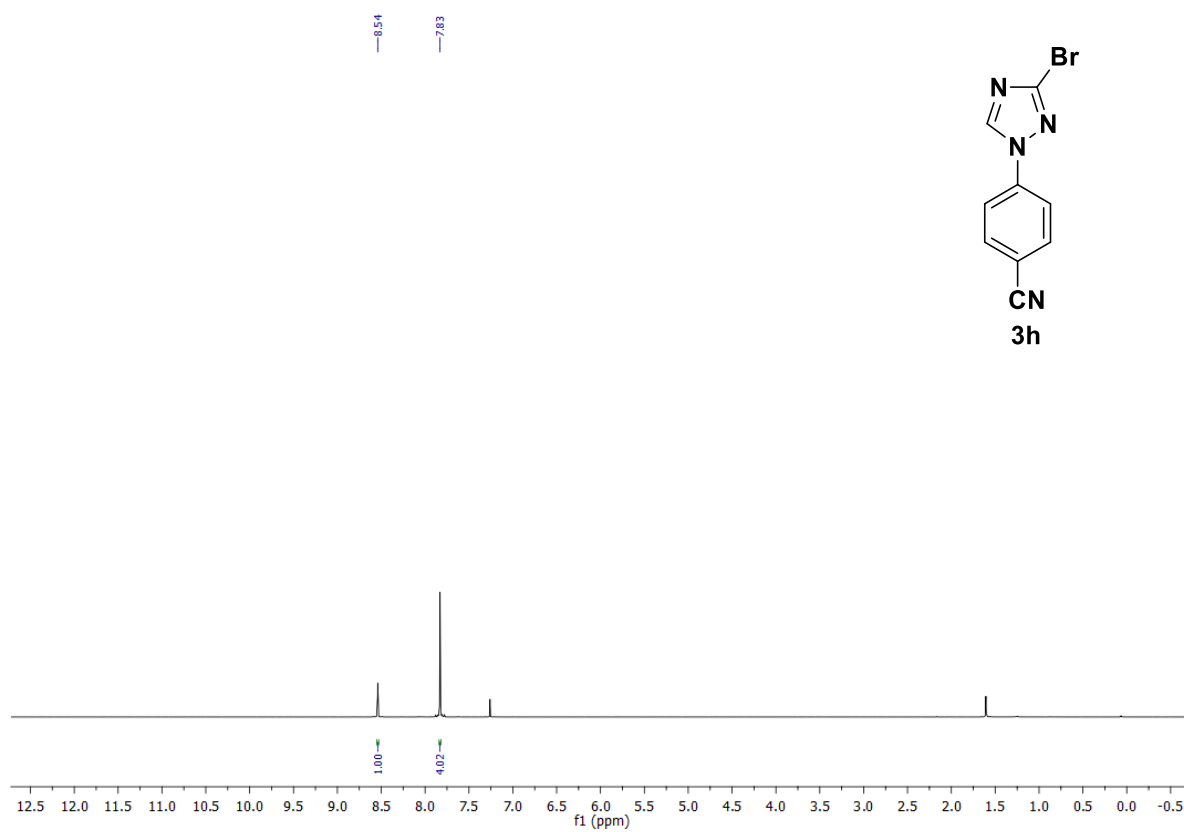

**<sup>13</sup>C{<sup>1</sup>H} NMR (101 MHz, CDCl<sub>3</sub>) of 4-(3-bromo-1*H*-1,2,4-triazol-1-yl)benzonitrile (3h):**

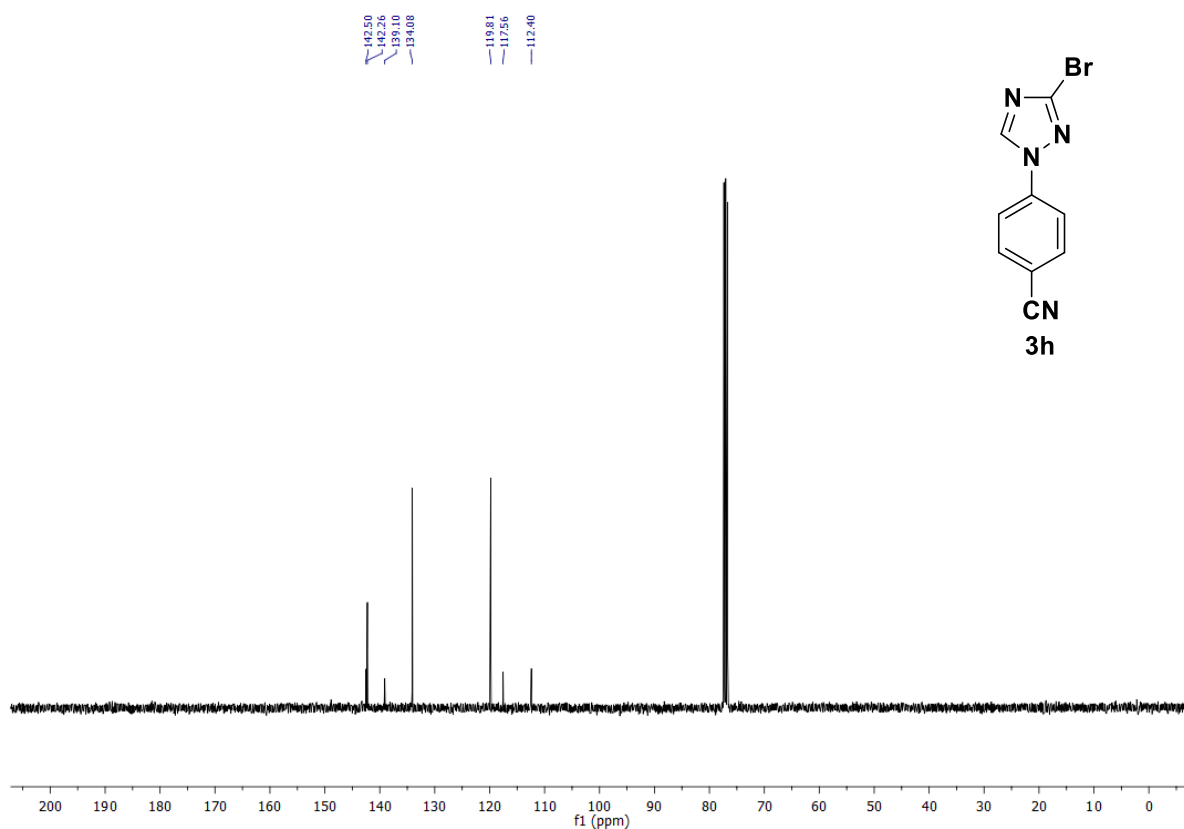

**<sup>1</sup>H NMR (400 MHz, CDCl<sub>3</sub>) of 3-bromo-1-(3-chlorophenyl)-1H-1,2,4-triazole (3i):**

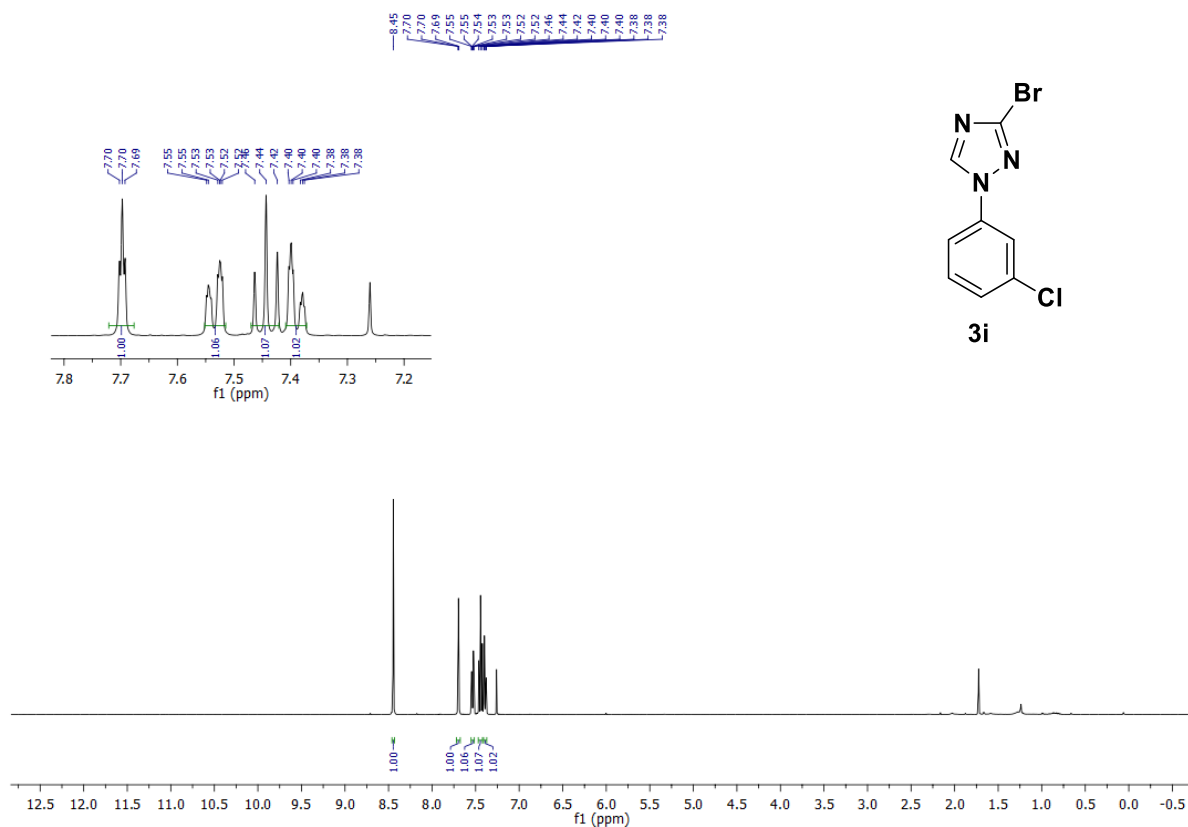

**<sup>13</sup>C{<sup>1</sup>H} NMR (101 MHz, CDCl<sub>3</sub>) of 3-bromo-1-(3-chlorophenyl)-1H-1,2,4-triazole (3i):**

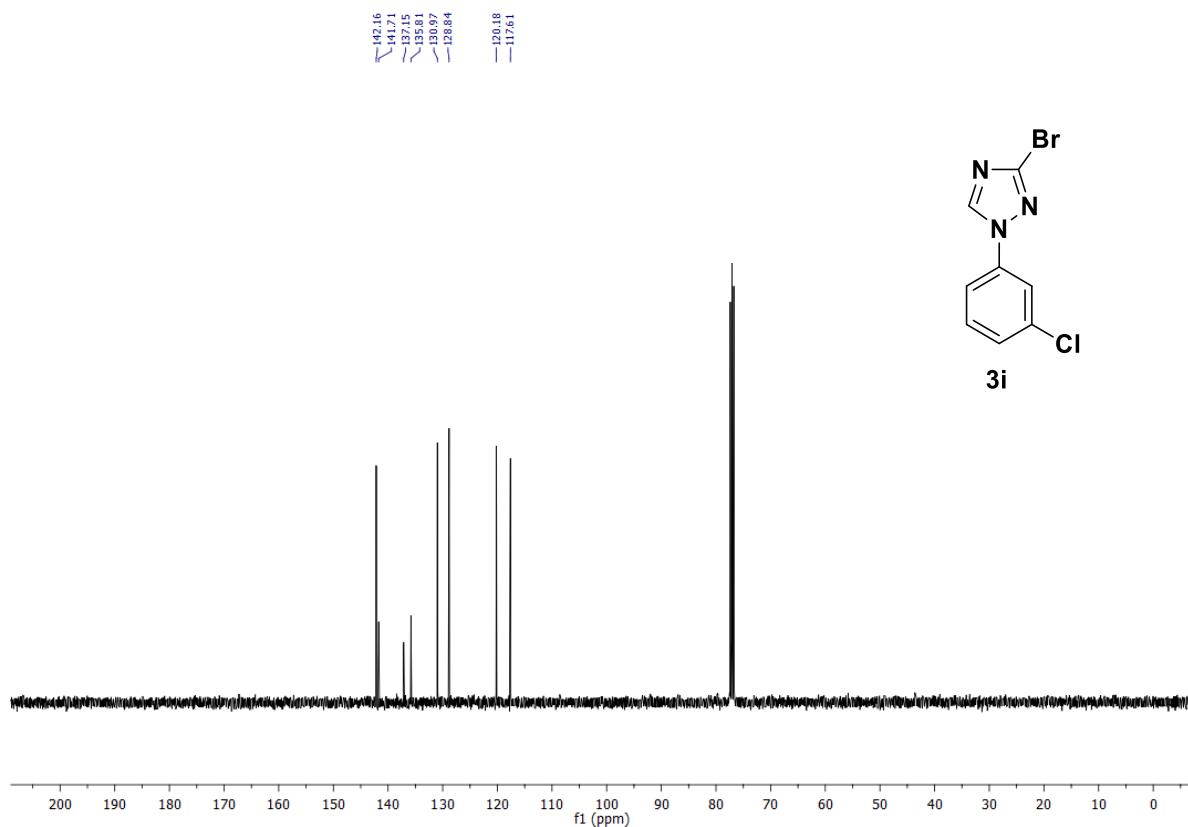



**<sup>1</sup>H NMR (400 MHz, CDCl<sub>3</sub>) of 3-bromo-1-(3-(trifluoromethyl)phenyl)-1*H*-1,2,4-triazole (3j):**

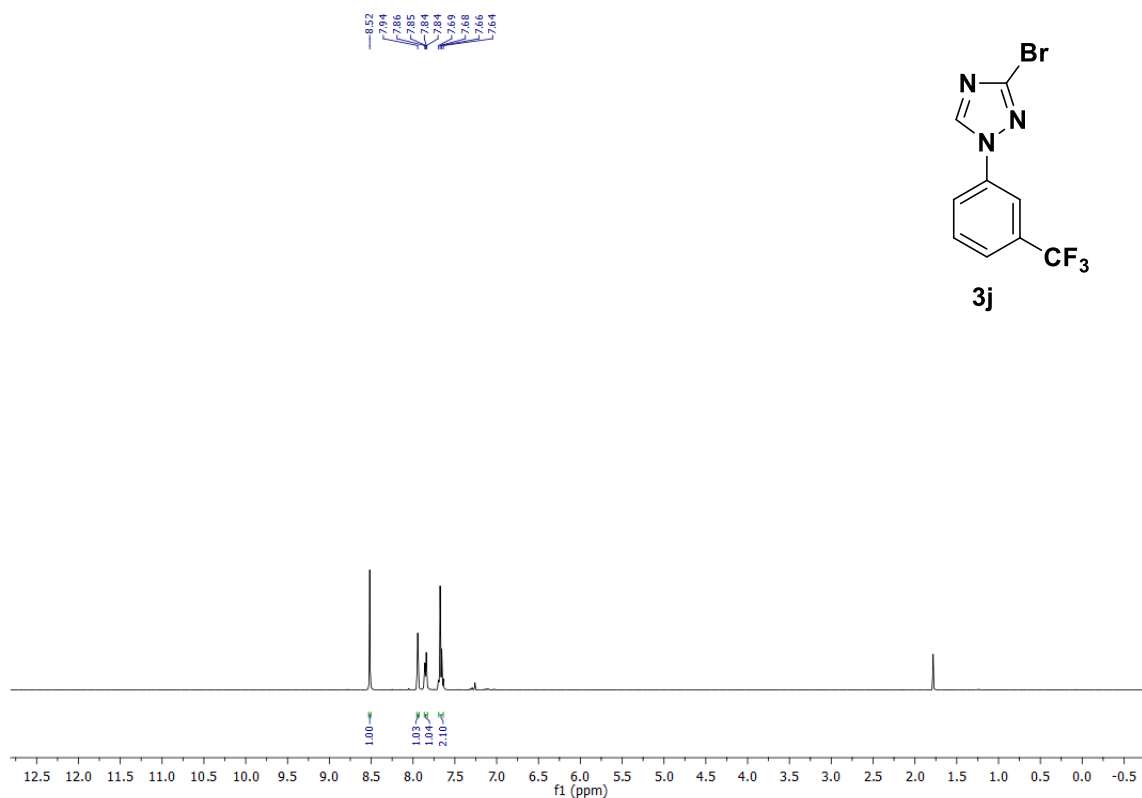

**<sup>13</sup>C{<sup>1</sup>H} NMR (101 MHz, CDCl<sub>3</sub>) of 3-bromo-1-(3-(trifluoromethyl)phenyl)-1*H*-1,2,4-triazole (3j):**

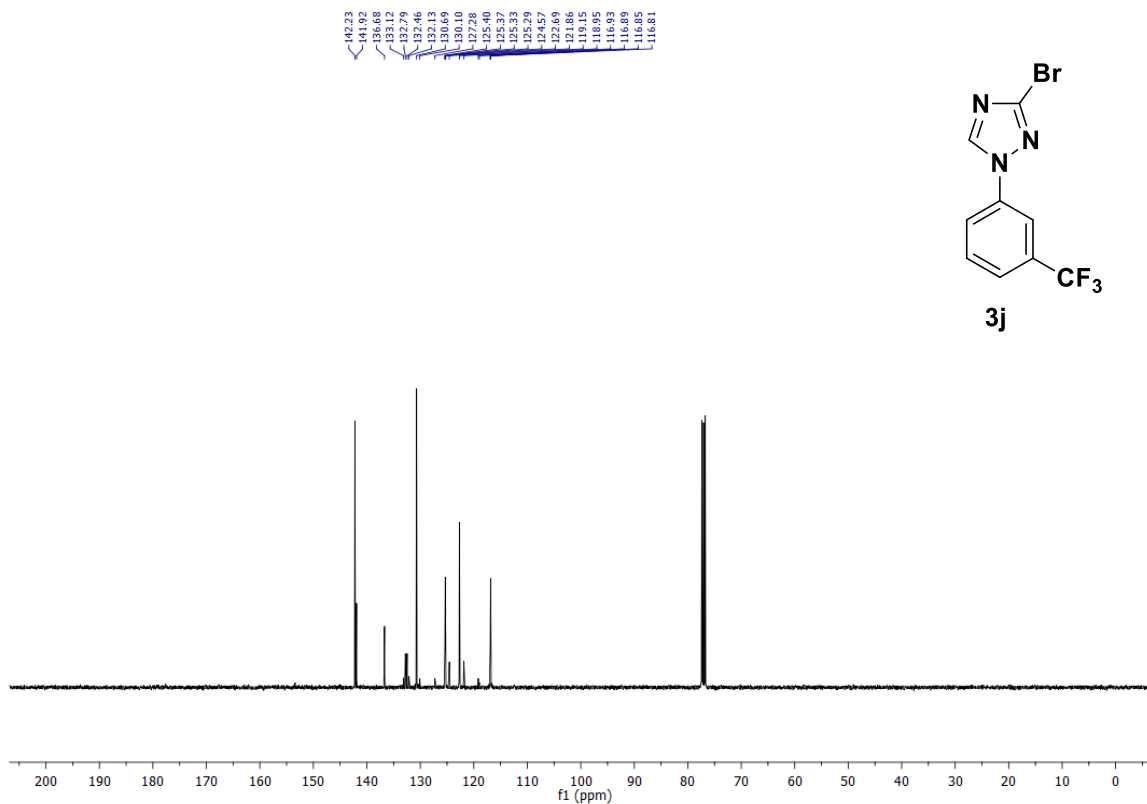

**<sup>19</sup>F NMR (377 MHz, CDCl<sub>3</sub>) of 3-bromo-1-(3-(trifluoromethyl)phenyl)-1*H*-1,2,4-triazole (3j):**

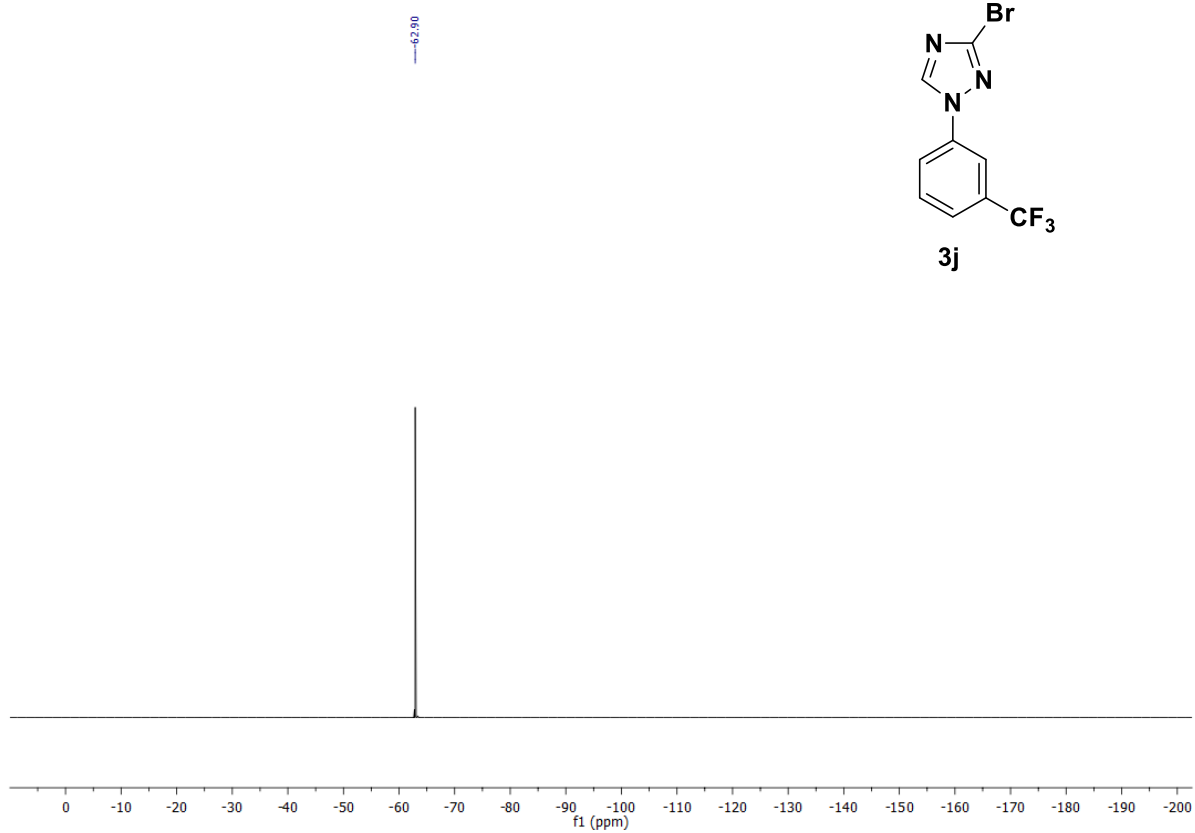

**$^1\text{H}$  NMR (400 MHz,  $\text{CDCl}_3$ ) of 3-(3-bromo-1*H*-1,2,4-triazol-1-yl)benzaldehyde (3k):**

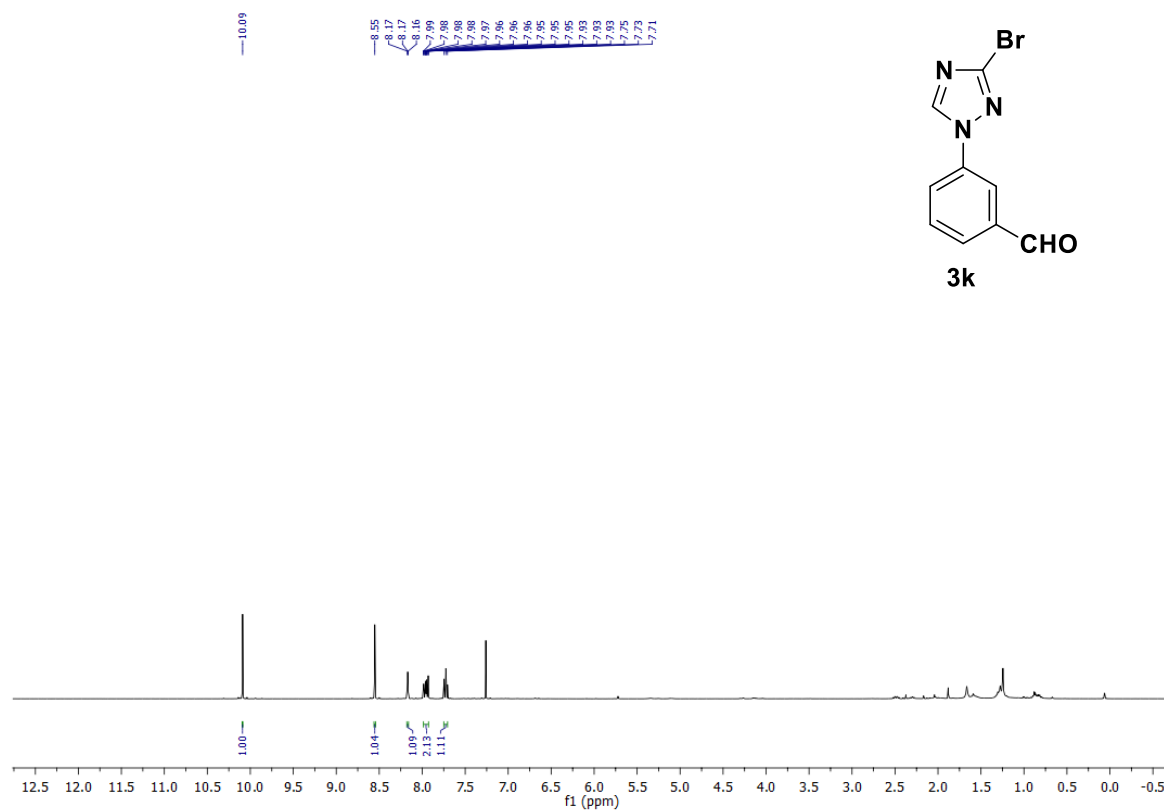

**$^{13}\text{C}\{^1\text{H}\}$  NMR (101 MHz,  $\text{CDCl}_3$ ) of 3-(3-bromo-1*H*-1,2,4-triazol-1-yl)benzaldehyde (3k):**

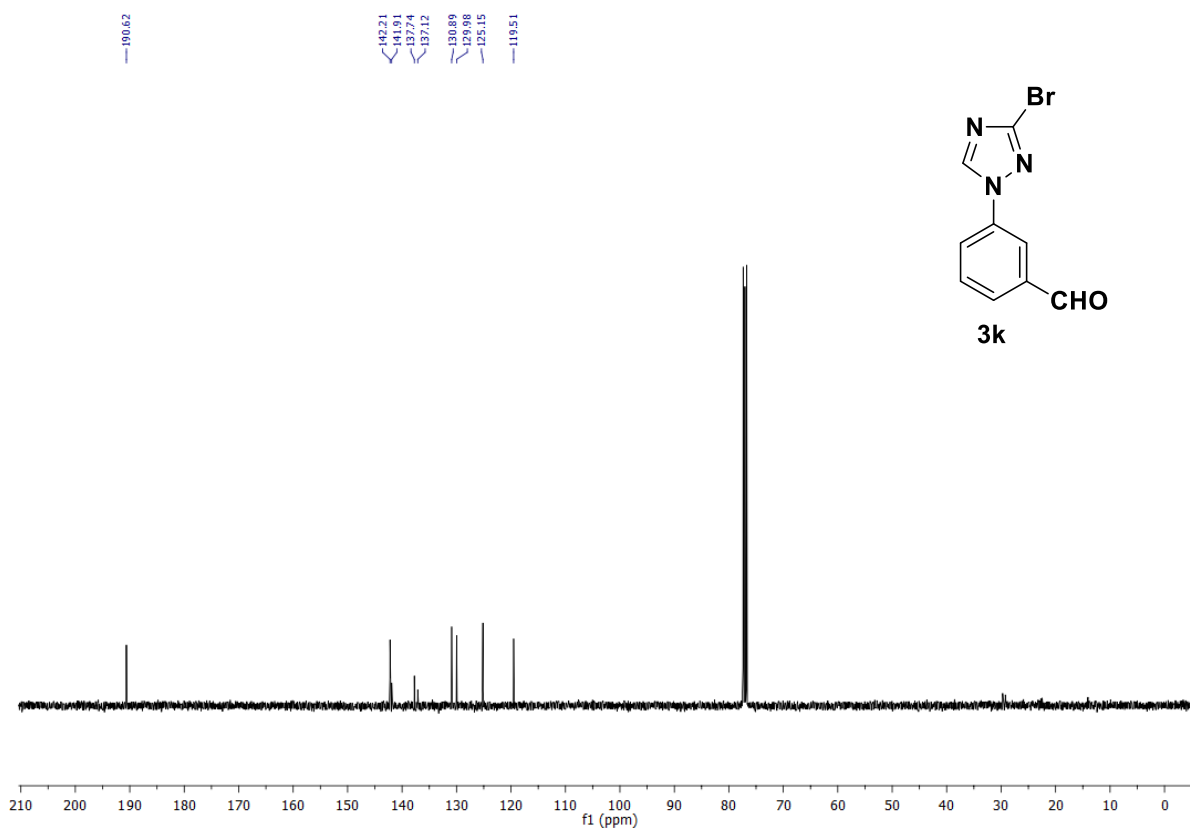

**$^1\text{H}$  NMR (400 MHz,  $\text{CDCl}_3$ ) of 3-bromo-1-(3,4-difluorophenyl)-1*H*-1,2,4-triazole (31):**

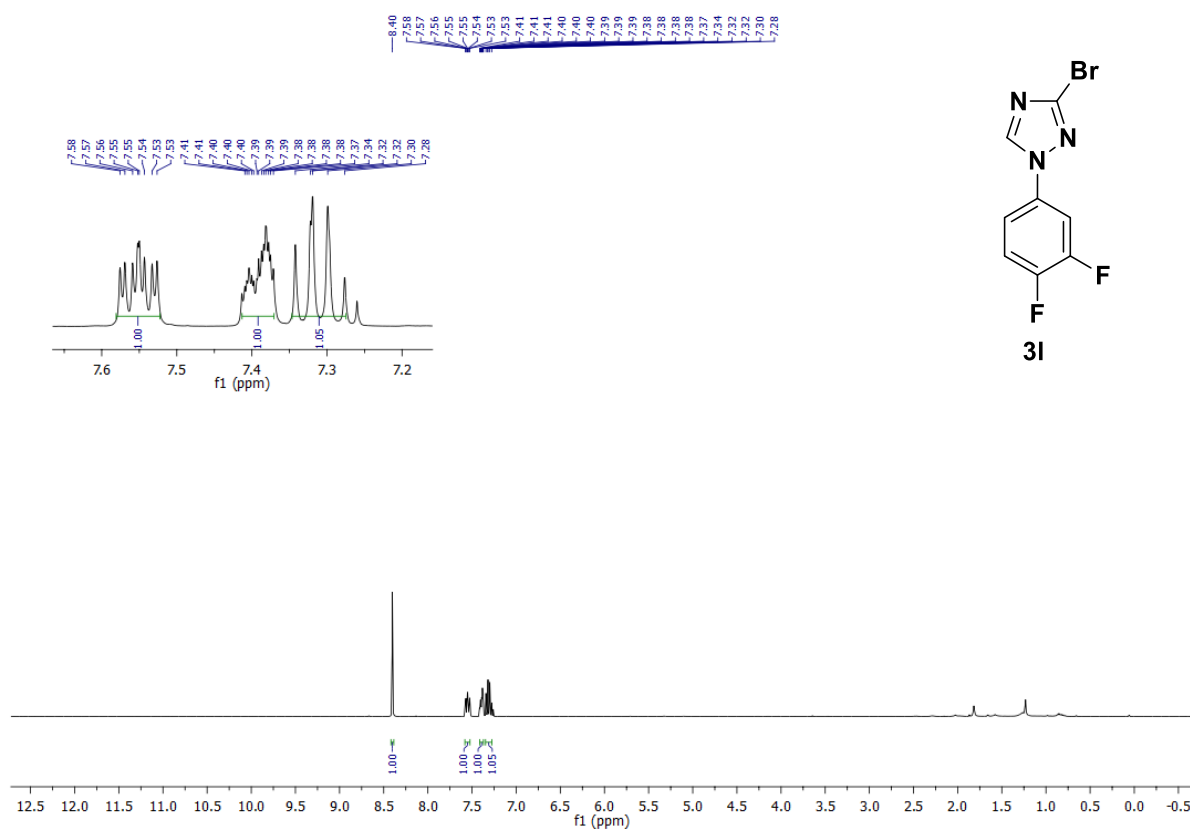

**$^{13}\text{C}\{^1\text{H}\}$  NMR (101 MHz,  $\text{CDCl}_3$ ) of 3-bromo-1-(3,4-difluorophenyl)-1*H*-1,2,4-triazole (31):**

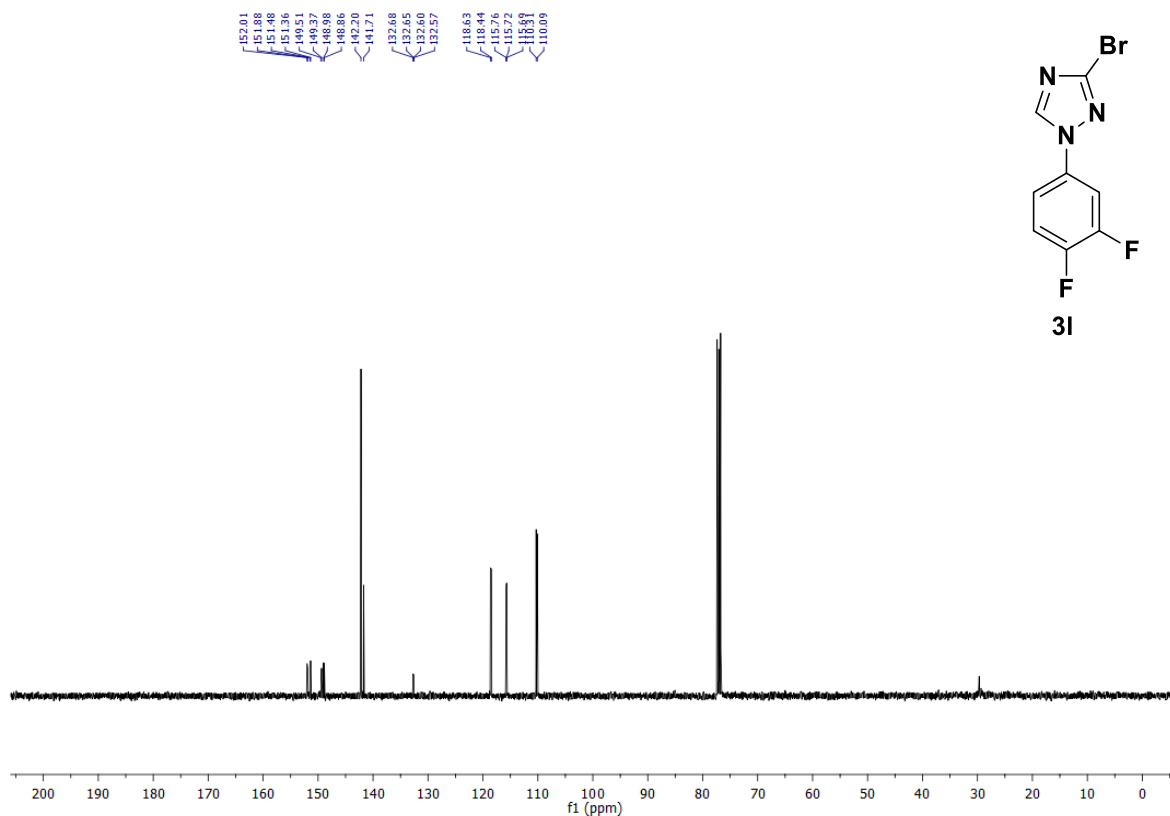

**<sup>19</sup>F NMR (377 MHz, CDCl<sub>3</sub>) of 3-bromo-1-(3,4-difluorophenyl)-1H-1,2,4-triazole (3I):**

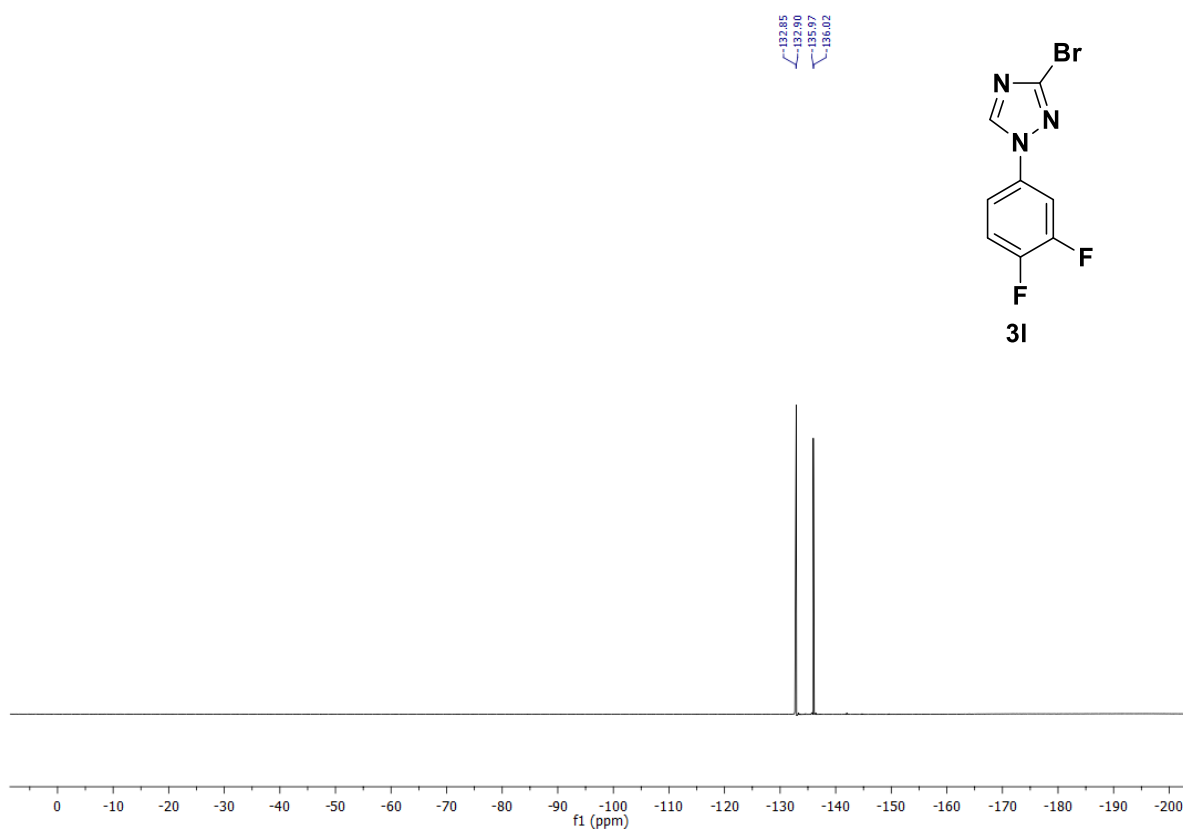

**$^1\text{H}$  NMR (400 MHz,  $\text{CDCl}_3$ ) of 3-bromo-1-(3-fluoro-4-methoxyphenyl)-1*H*-1,2,4-triazole (3m):**

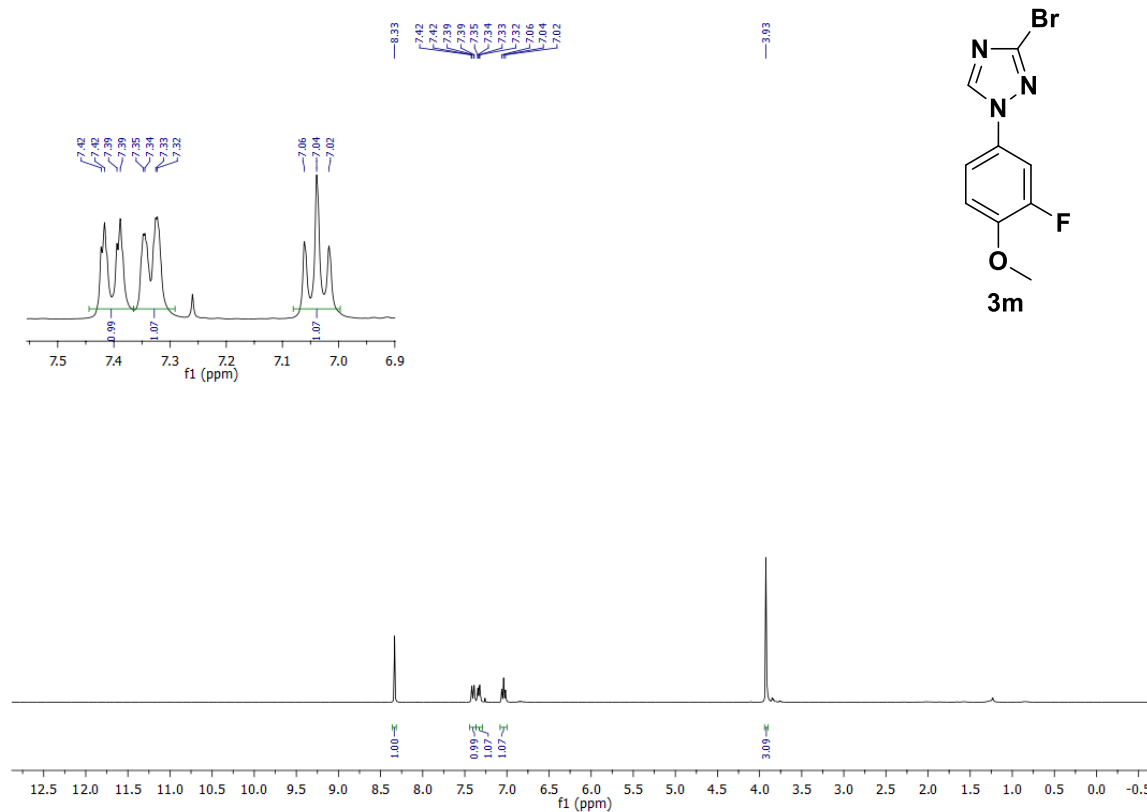

**$^{13}\text{C}\{^1\text{H}\}$  NMR (101 MHz,  $\text{CDCl}_3$ ) of 3-bromo-1-(3-fluoro-4-methoxyphenyl)-1*H*-1,2,4-triazole (3m):**

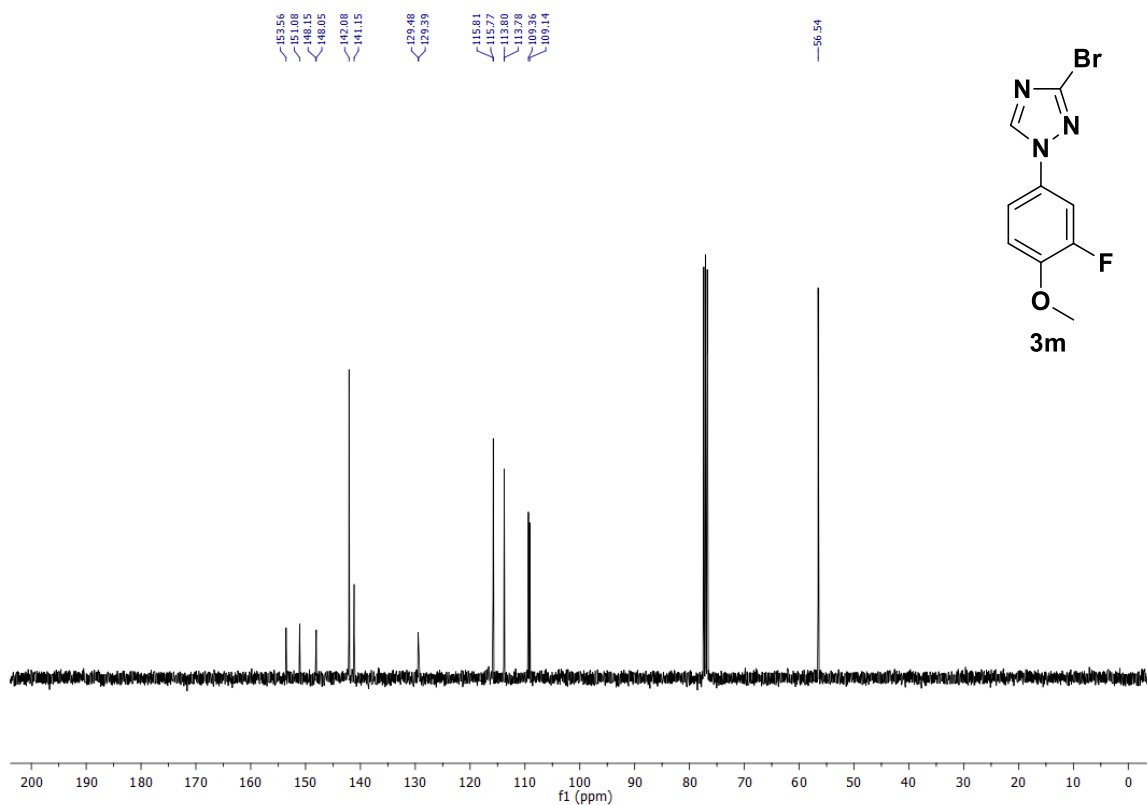

**<sup>19</sup>F NMR (377 MHz, CDCl<sub>3</sub>) of 3-bromo-1-(3-fluoro-4-methoxyphenyl)-1*H*-1,2,4-triazole (3m):**

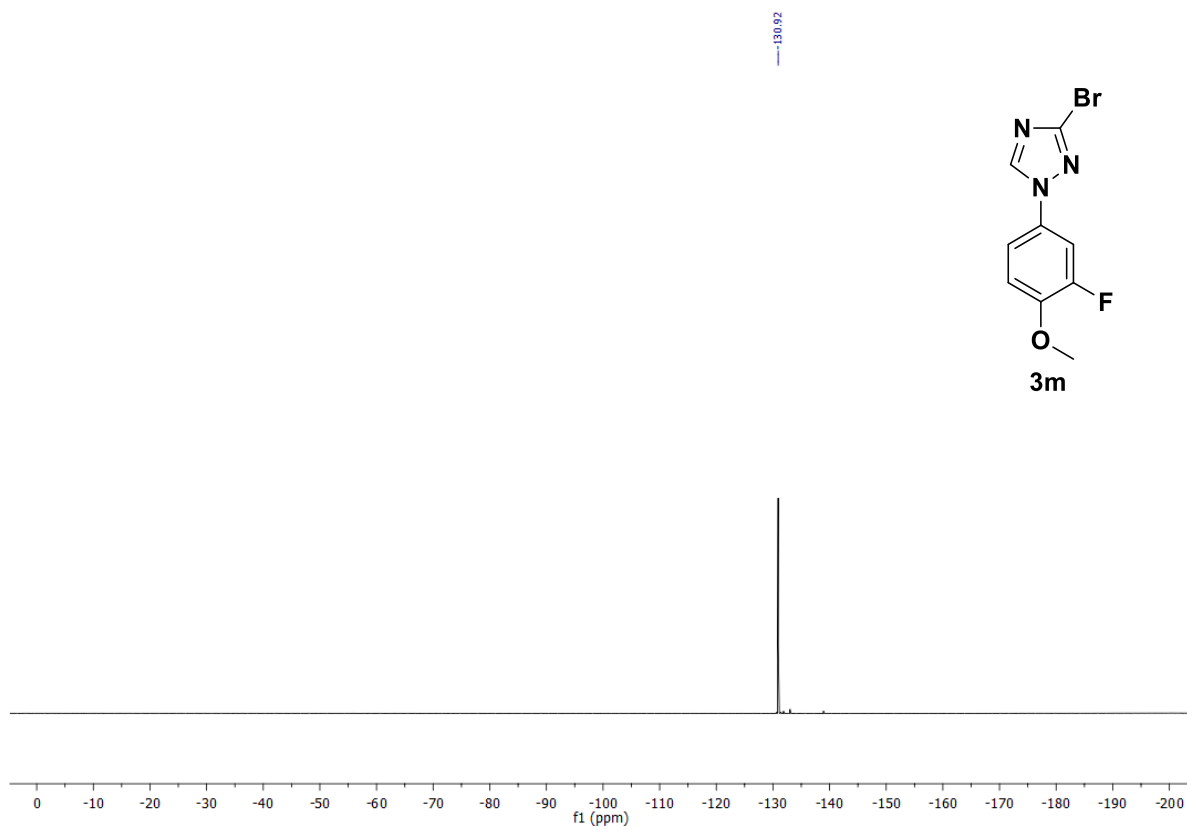

**$^1\text{H}$  NMR (400 MHz,  $\text{CDCl}_3$ ) of 3-bromo-1-(3,4-dimethoxyphenyl)-1*H*-1,2,4-triazole (3n):**

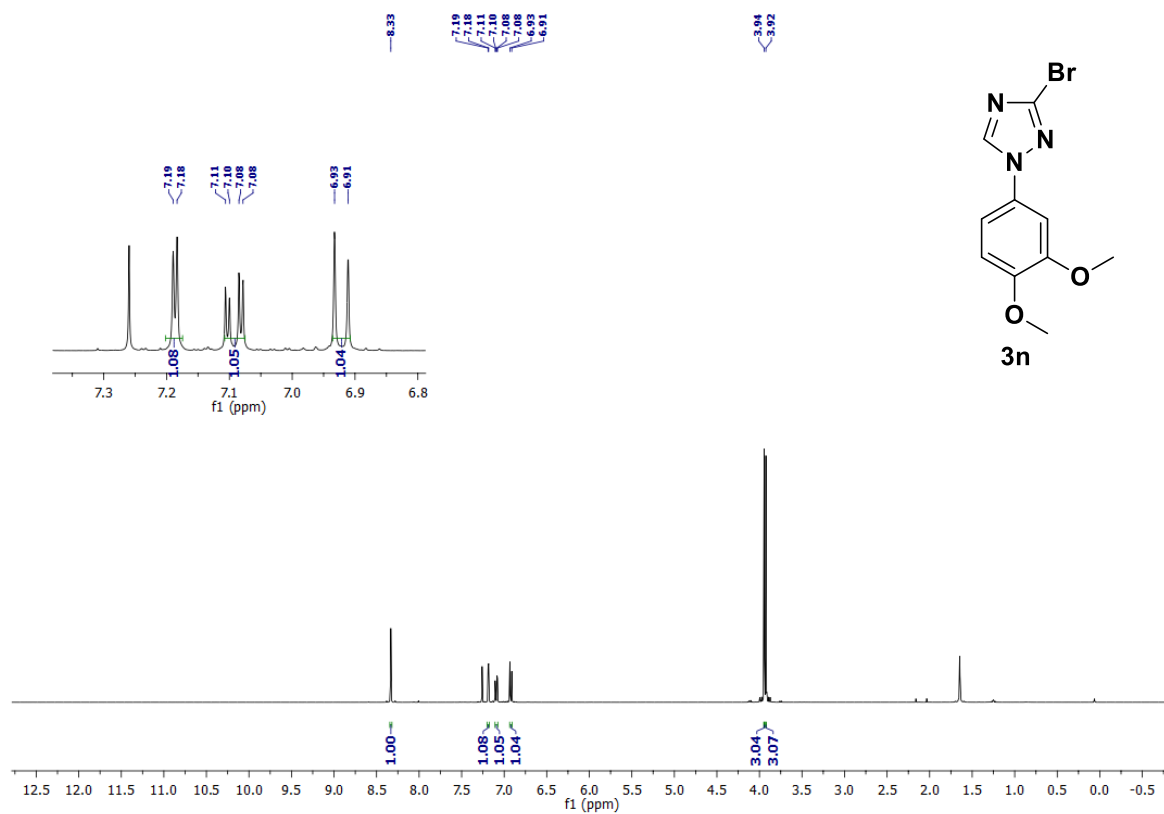

**$^{13}\text{C}\{^1\text{H}\}$  NMR (101 MHz,  $\text{CDCl}_3$ ) of 3-bromo-1-(3,4-dimethoxyphenyl)-1*H*-1,2,4-triazole (3n):**

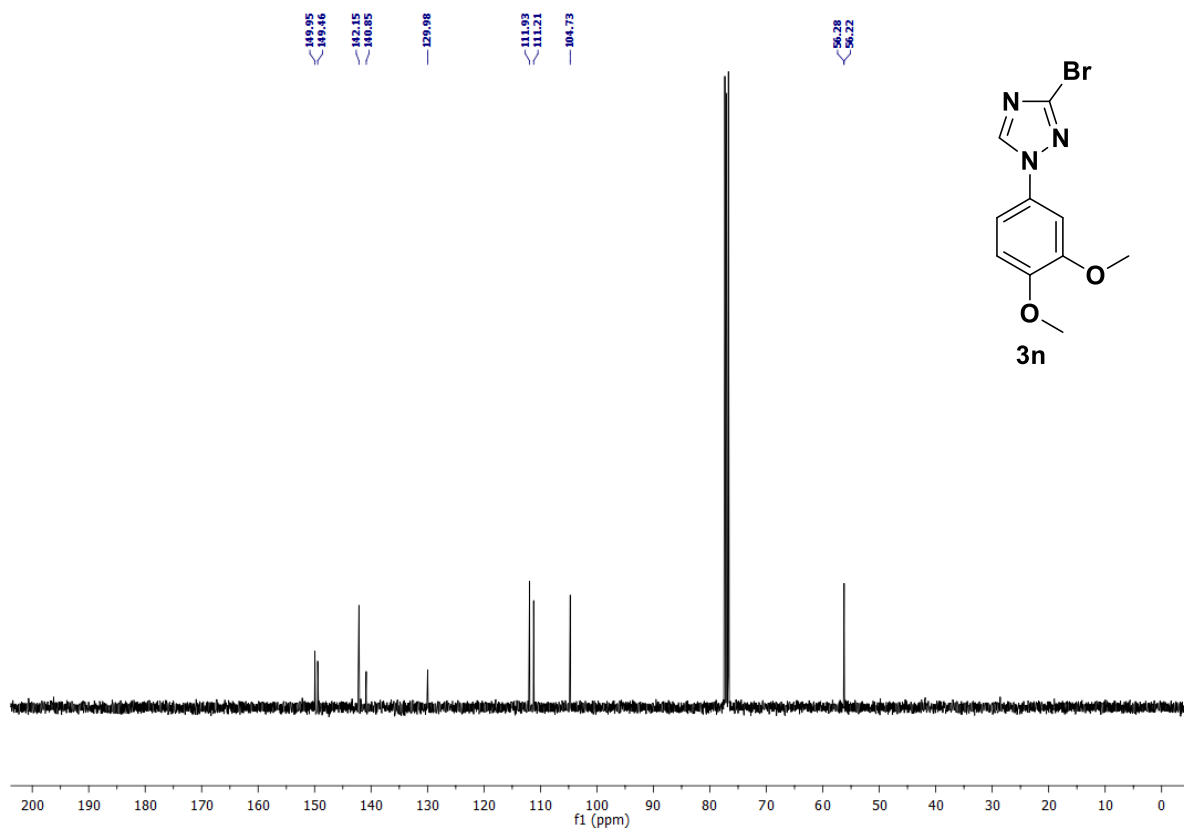



**$^1\text{H}$  NMR (400 MHz,  $\text{CDCl}_3$ ) of 3-bromo-1-(3,4,5-trimethoxyphenyl)-1*H*-1,2,4-triazole (3o):**

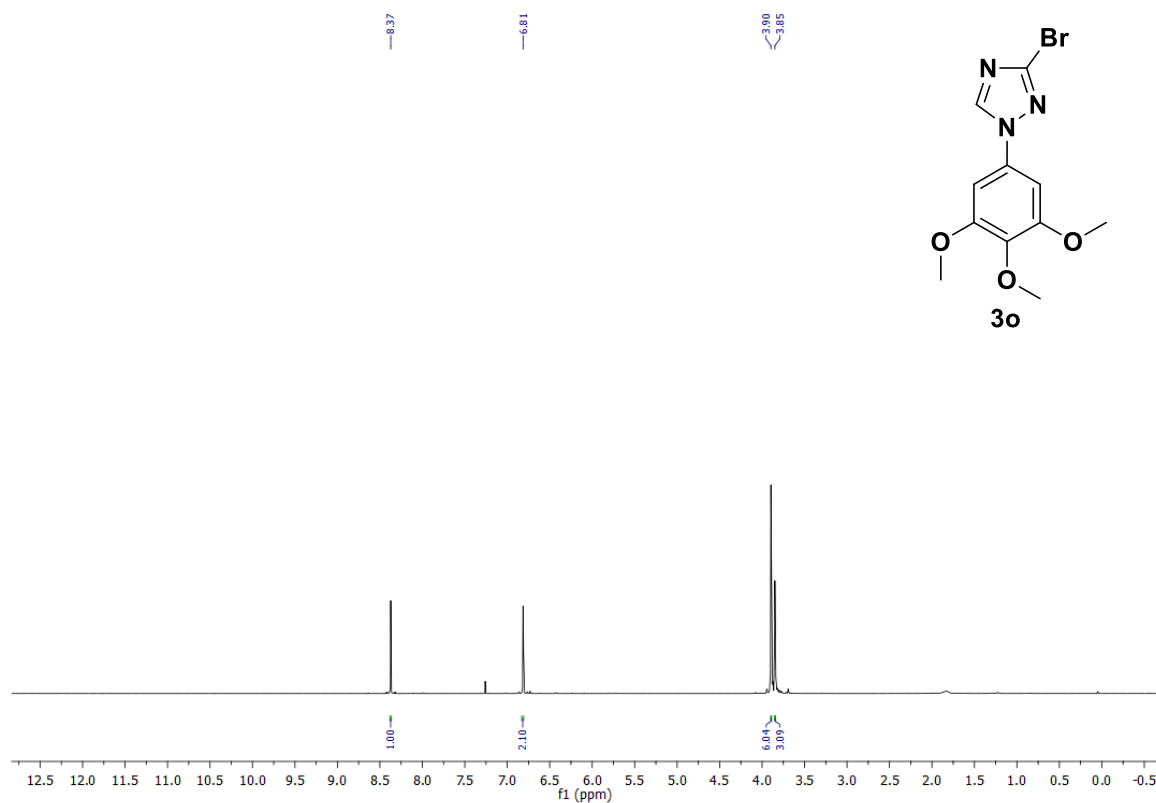

**$^{13}\text{C}\{^1\text{H}\}$  NMR (101 MHz,  $\text{CDCl}_3$ ) of 3-bromo-1-(3,4,5-trimethoxyphenyl)-1*H*-1,2,4-triazole (3o):**

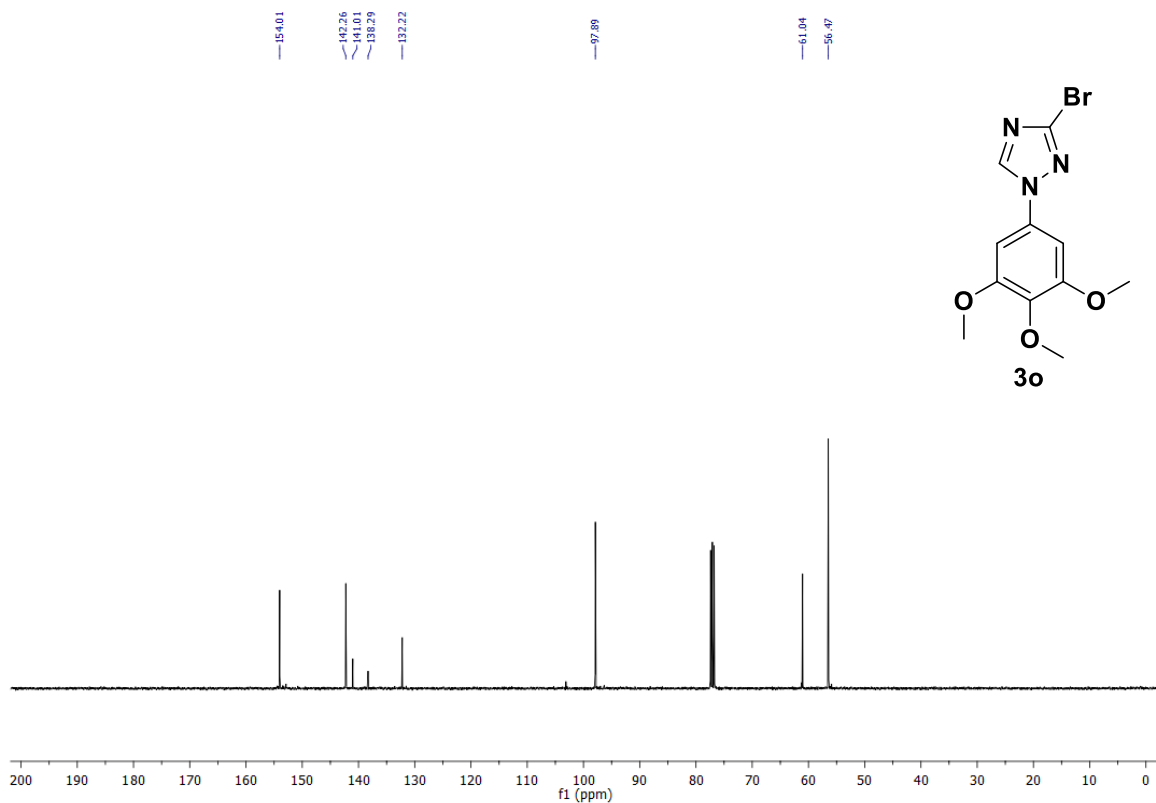

**<sup>1</sup>H NMR (400 MHz, CDCl<sub>3</sub>) of 3-bromo-1-(naphthalen-1-yl)-1H-1,2,4-triazole (3p):**

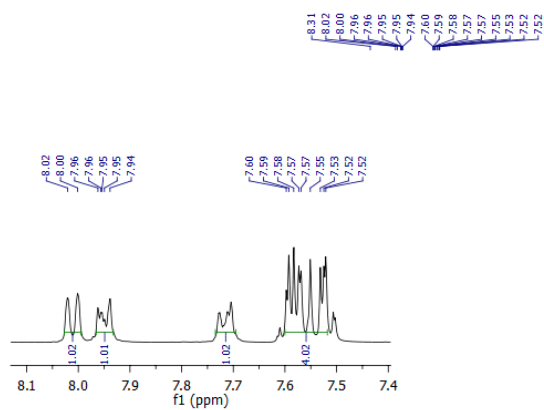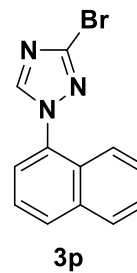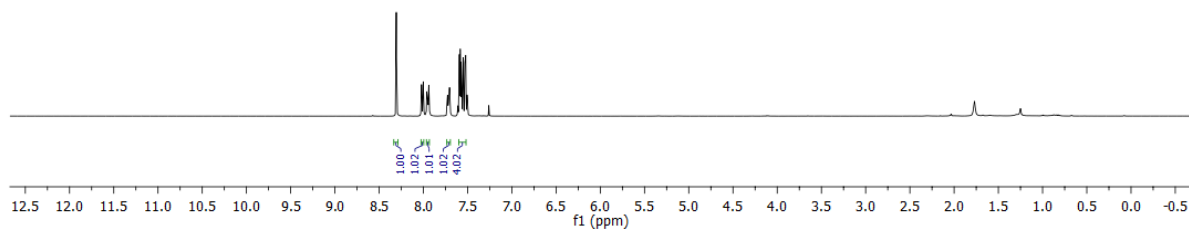

**<sup>13</sup>C{<sup>1</sup>H} NMR (101 MHz, CDCl<sub>3</sub>) of 3-bromo-1-(naphthalen-1-yl)-1H-1,2,4-triazole (3p):**

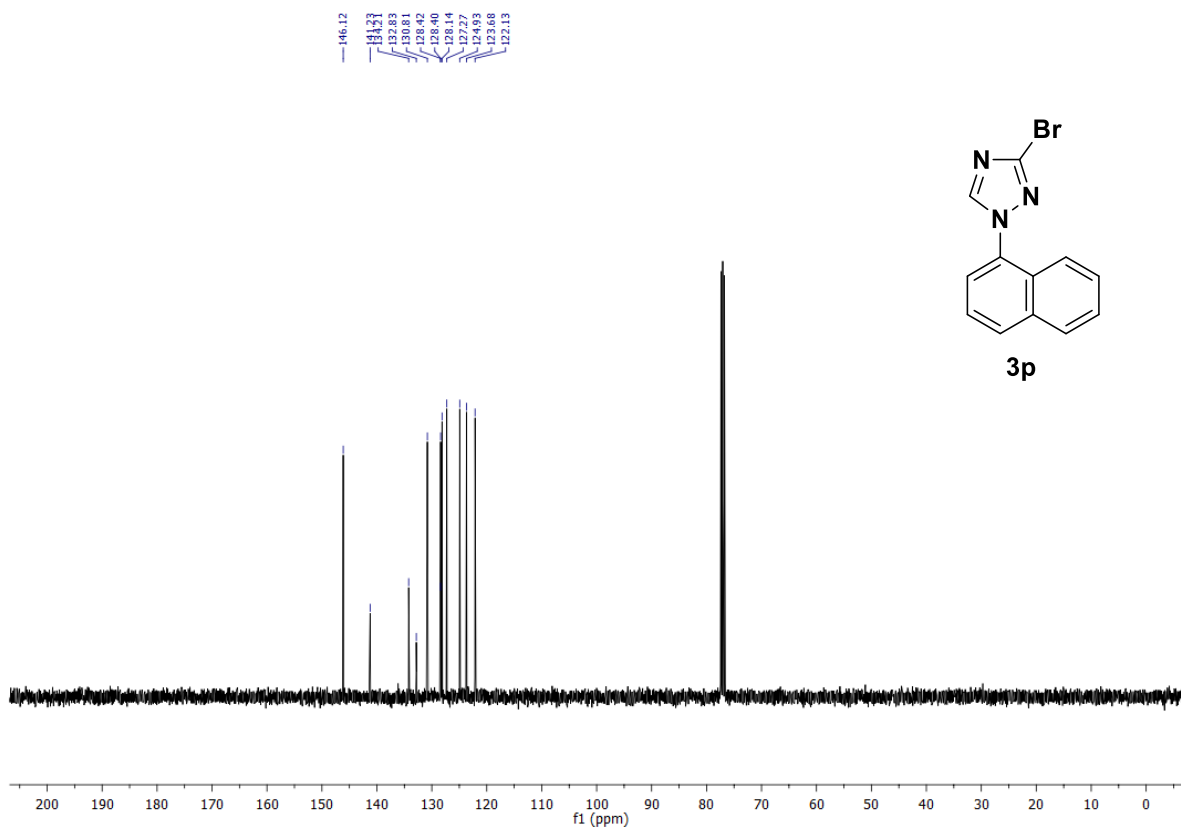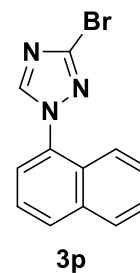

$^1\text{H}$  NMR (400 MHz,  $\text{CDCl}_3$ ) of 1-(benzo[*d*][1,3]dioxol-5-yl)-3-bromo-1*H*-1,2,4-triazole (3q):

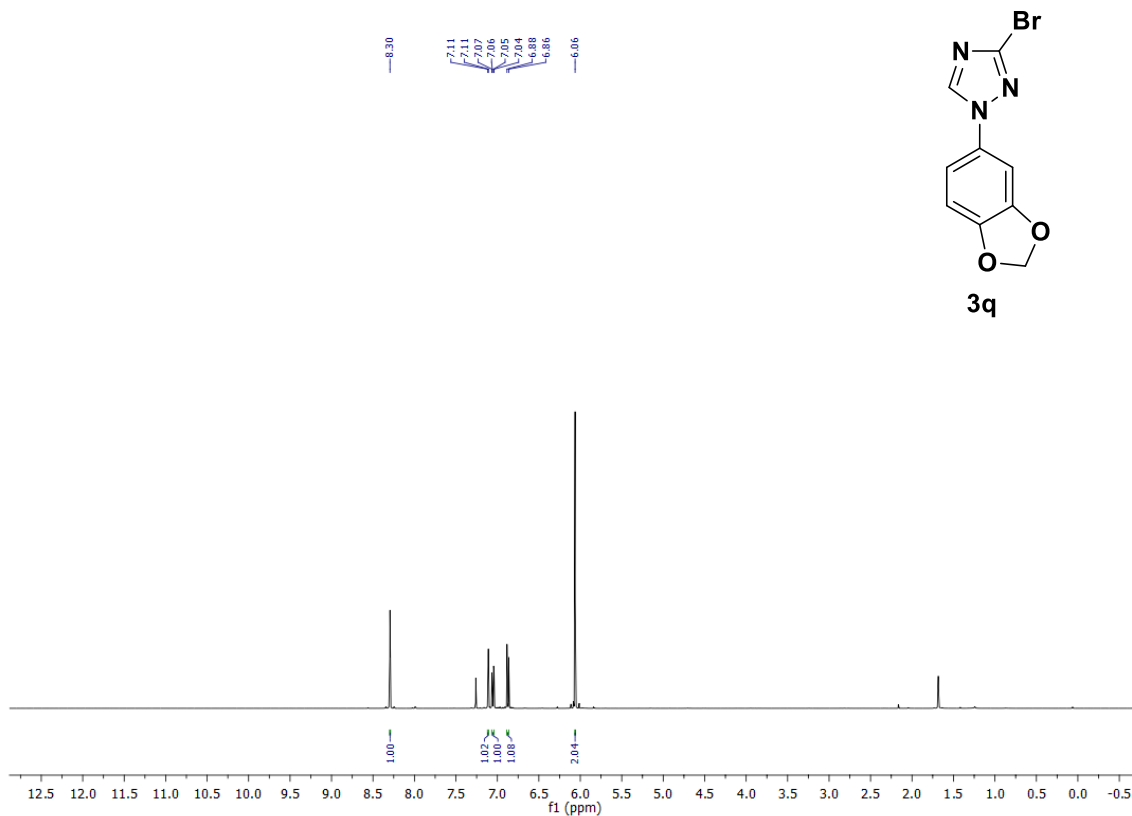

$^{13}\text{C}\{^1\text{H}\}$  NMR (101 MHz,  $\text{CDCl}_3$ ) of 1-(benzo[*d*][1,3]dioxol-5-yl)-3-bromo-1*H*-1,2,4-triazole (3q):

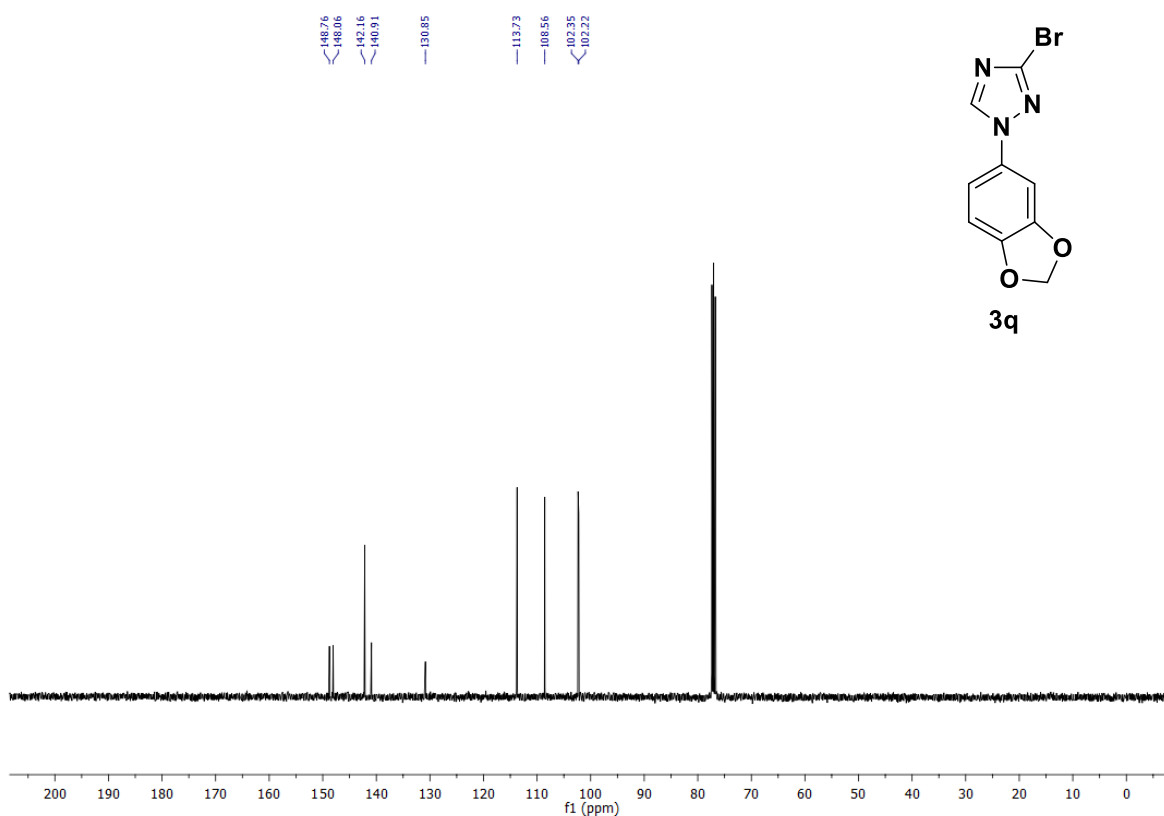

**$^1\text{H}$  NMR (400 MHz,  $\text{CDCl}_3$ ) of 4-(3-bromo-1*H*-1,2,4-triazol-1-yl)pyridine (3r):**

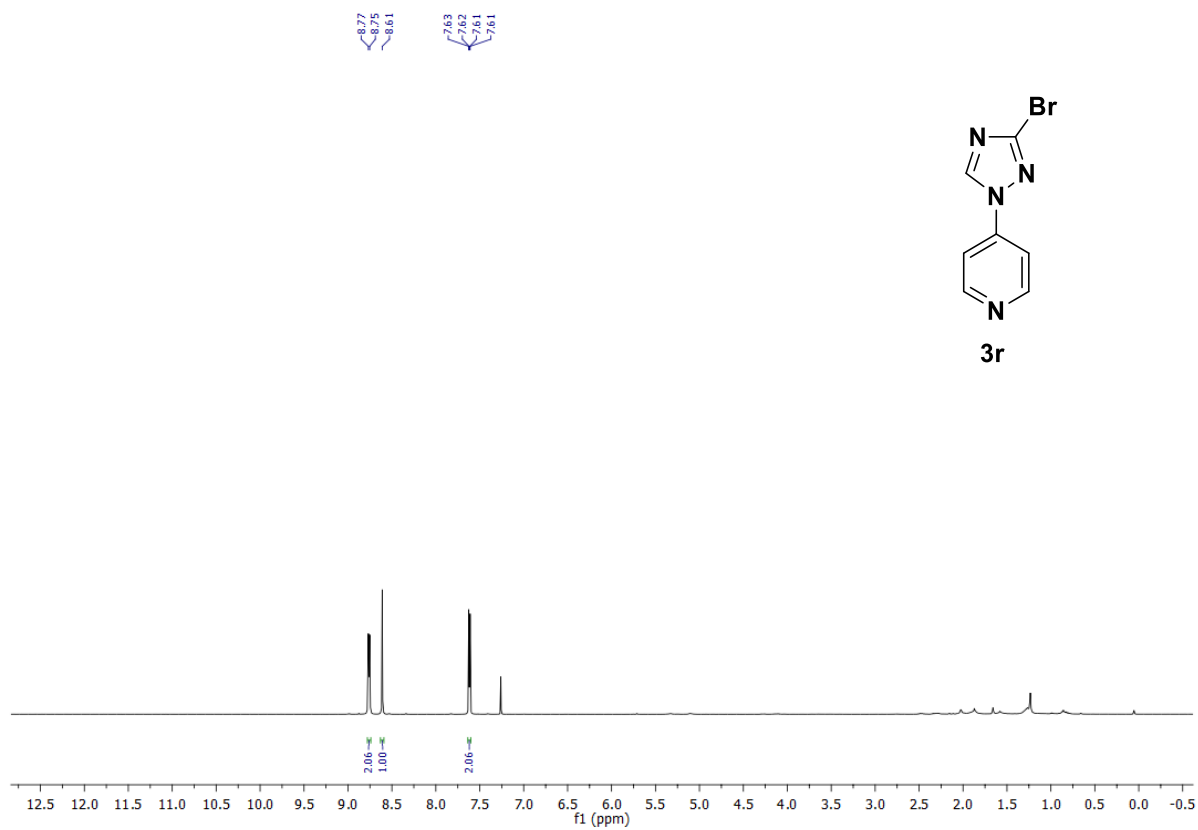

**$^{13}\text{C}\{^1\text{H}\}$  NMR (101 MHz,  $\text{CDCl}_3$ ) of 4-(3-bromo-1*H*-1,2,4-triazol-1-yl)pyridine (3r):**

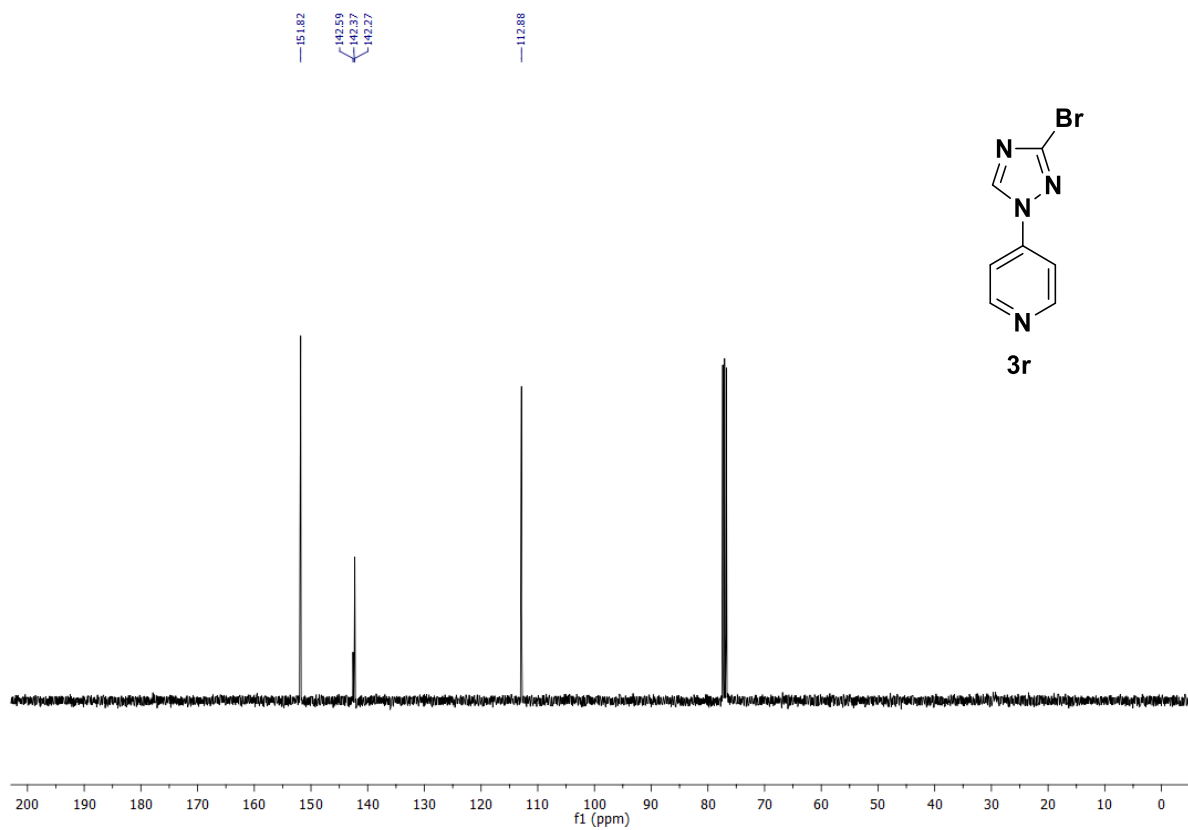

**<sup>1</sup>H NMR (400 MHz, CDCl<sub>3</sub>) of 3-(3-bromo-1*H*-1,2,4-triazol-1-yl)pyridine (3s):**

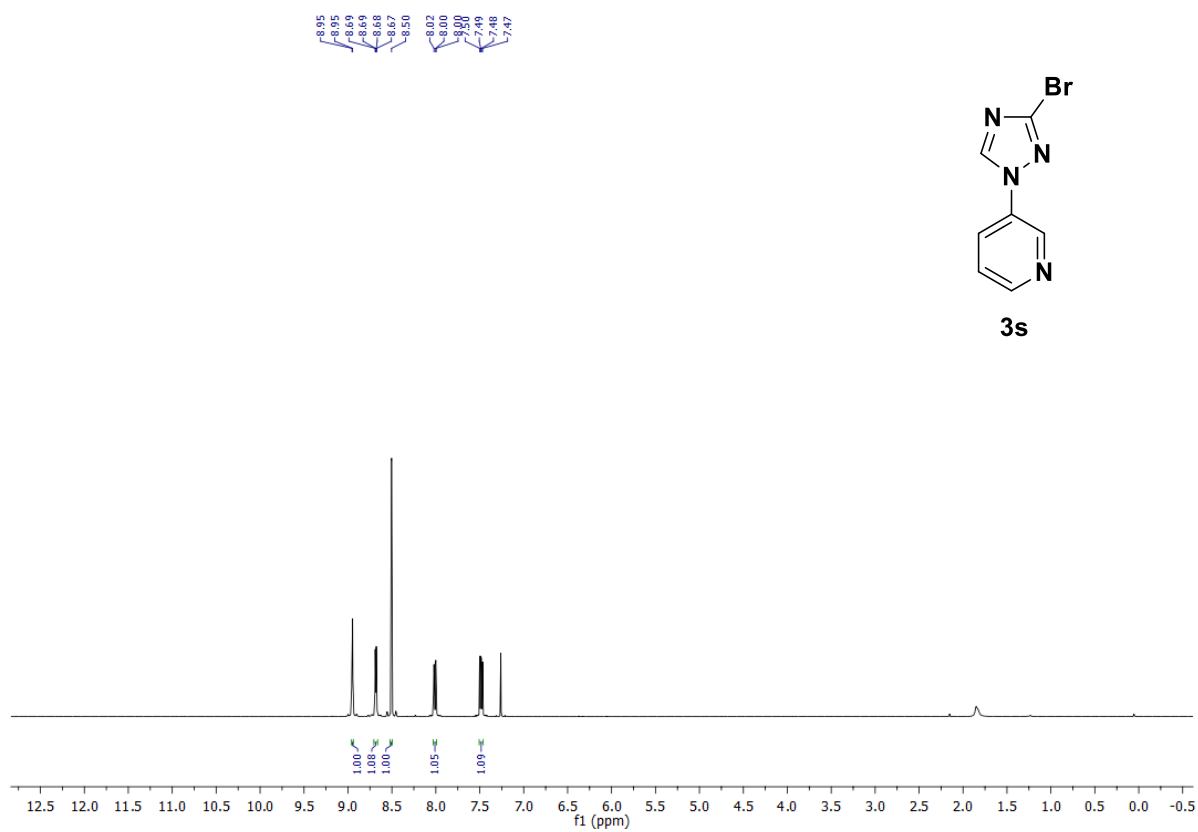

**<sup>13</sup>C{<sup>1</sup>H} NMR (101 MHz, CDCl<sub>3</sub>) of 3-(3-bromo-1*H*-1,2,4-triazol-1-yl)pyridine (3s):**

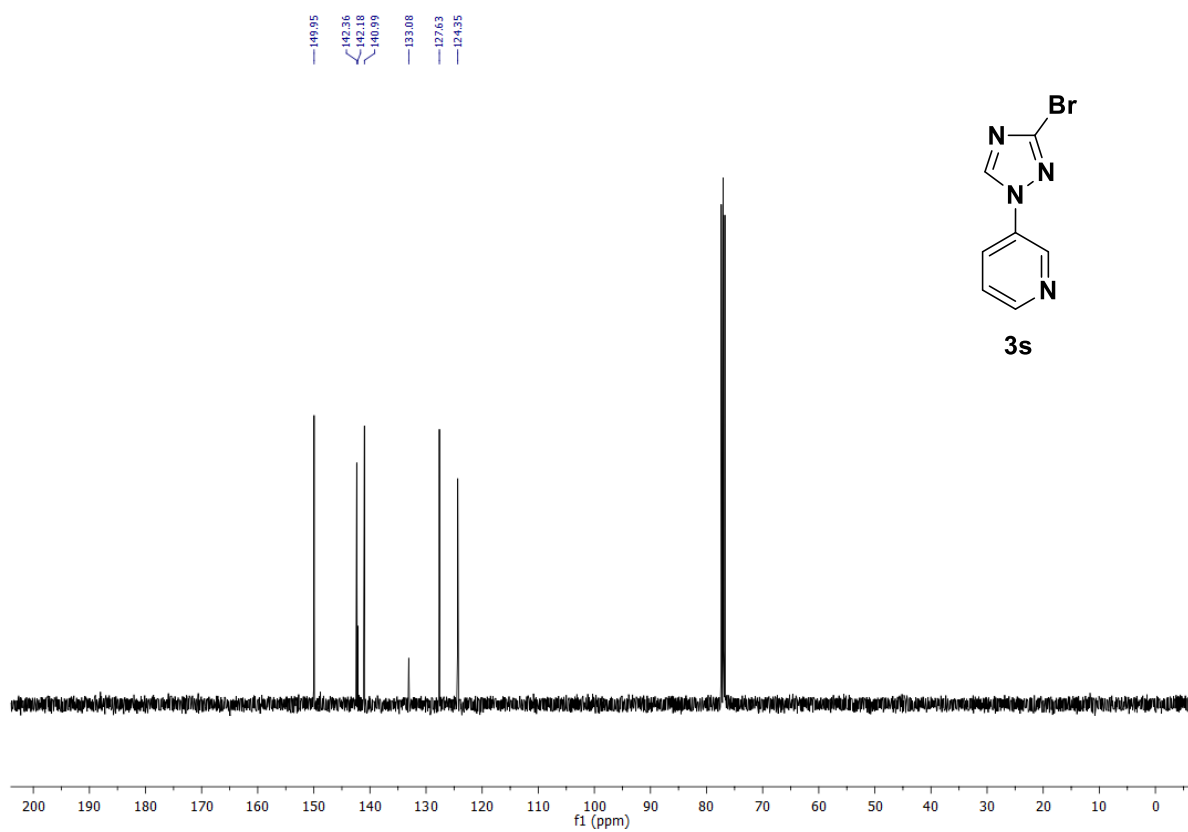

**<sup>1</sup>H NMR (400 MHz, CDCl<sub>3</sub>) of 5-(3-bromo-1*H*-1,2,4-triazol-1-yl)-2-methoxypyridine (3t):**

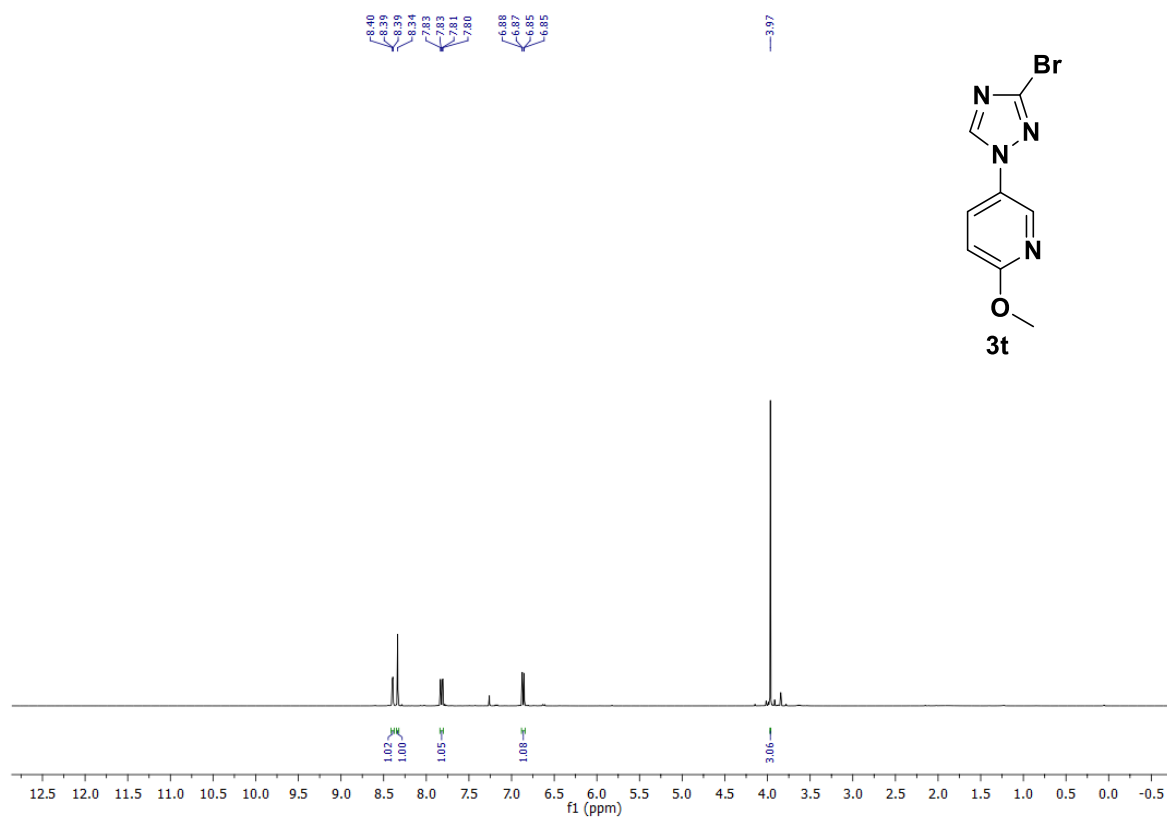

**<sup>13</sup>C{<sup>1</sup>H} NMR (101 MHz, CDCl<sub>3</sub>) of 5-(3-bromo-1*H*-1,2,4-triazol-1-yl)-2-methoxypyridine (3t):**

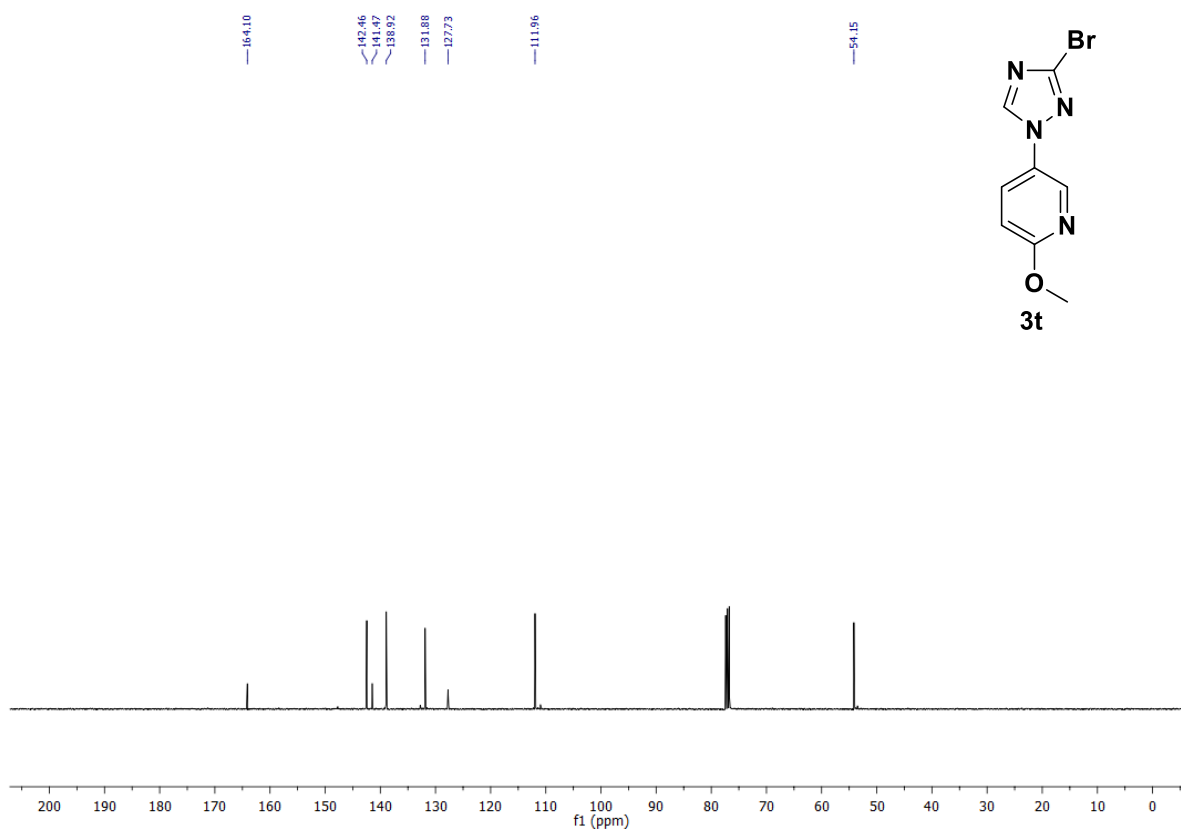

**<sup>1</sup>H NMR (400 MHz, CDCl<sub>3</sub>) of 3-(4-methoxyphenyl)-1-phenyl-1*H*-1,2,4-triazole (4a):**

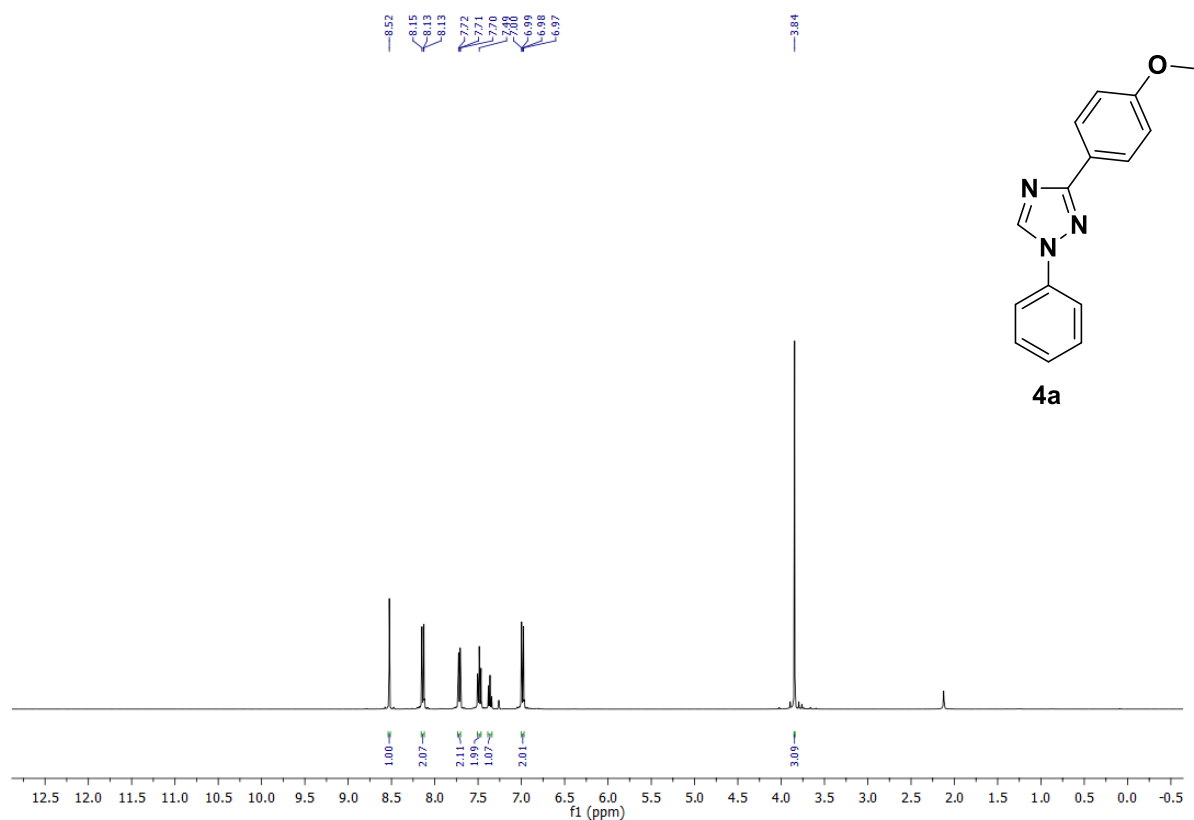

**<sup>13</sup>C{<sup>1</sup>H} NMR (101 MHz, CDCl<sub>3</sub>) of 3-(4-methoxyphenyl)-1-phenyl-1*H*-1,2,4-triazole (4a):**

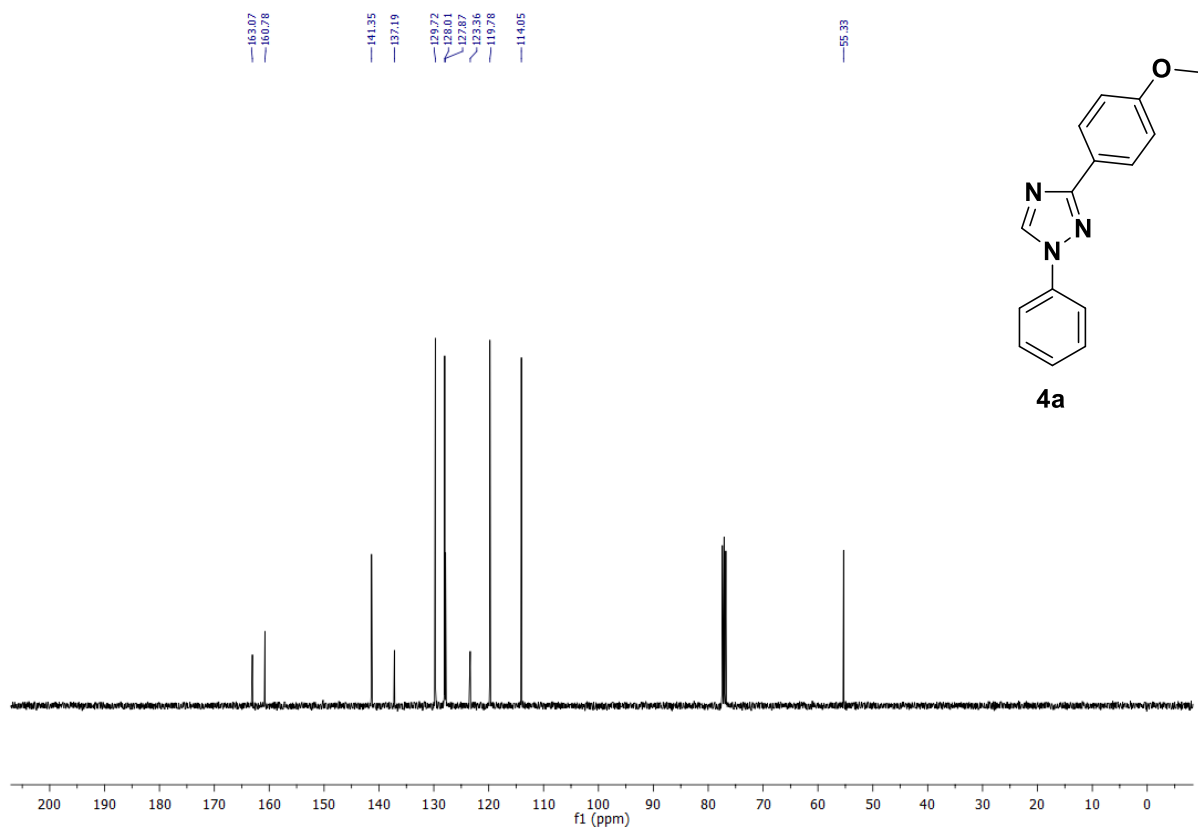

**$^1\text{H}$  NMR (400 MHz,  $\text{CDCl}_3$ ) of 3-(4-chlorophenyl)-1-(3,4-dimethoxyphenyl)-1*H*-1,2,4-triazole (4b):**

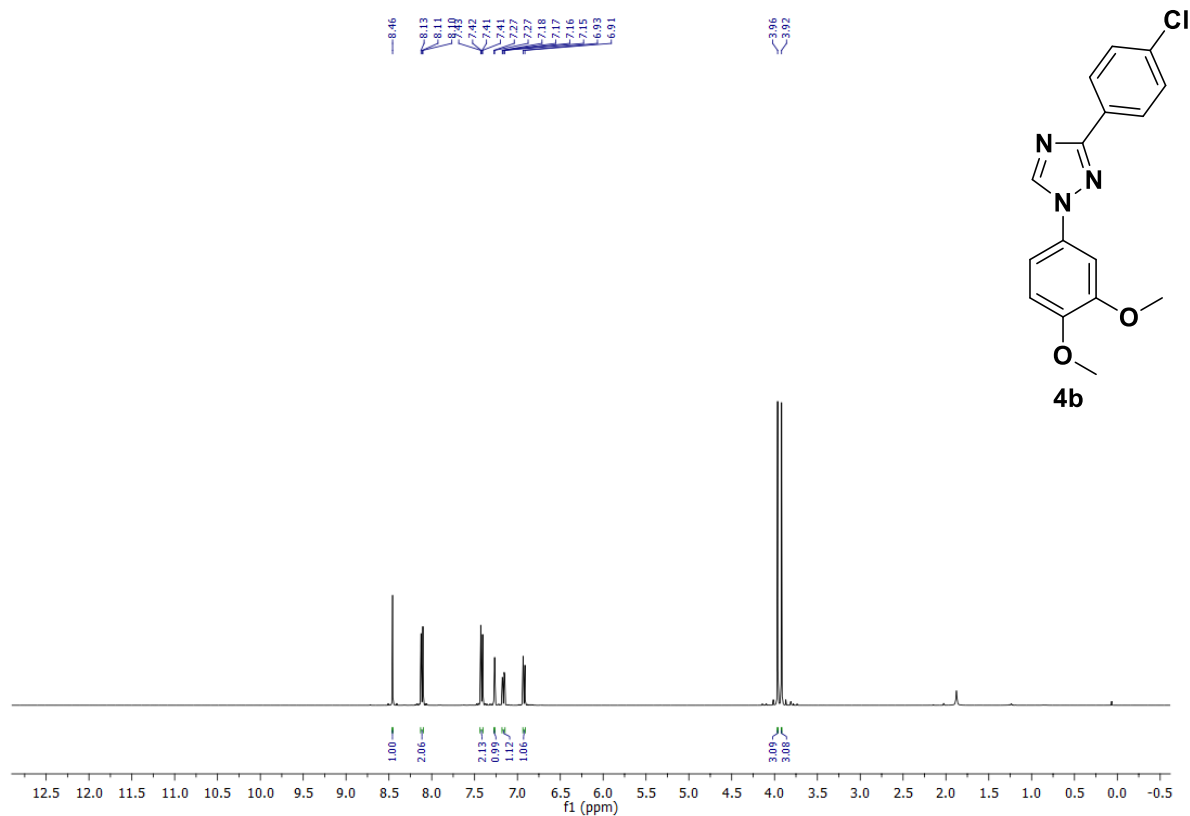

**$^{13}\text{C}\{^1\text{H}\}$  NMR (101 MHz,  $\text{CDCl}_3$ ) of 3-(4-chlorophenyl)-1-(3,4-dimethoxyphenyl)-1*H*-1,2,4-triazole (4b):**

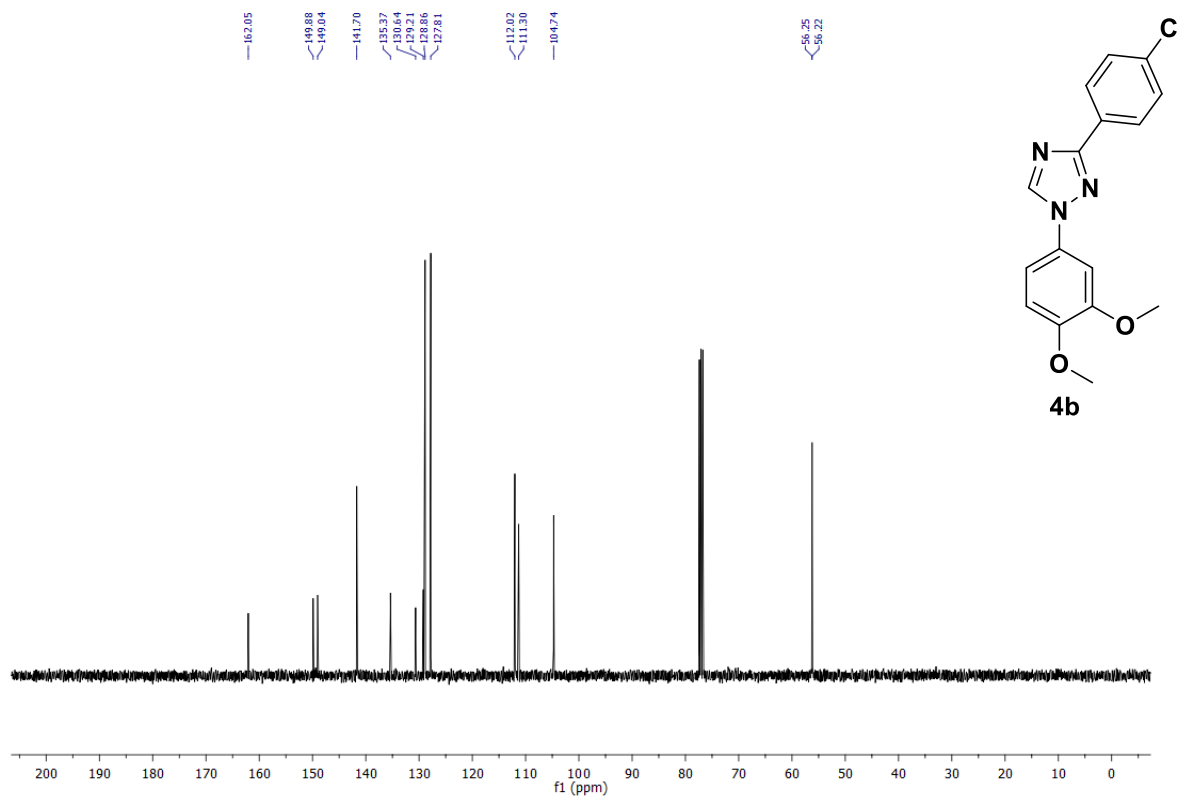



**$^1\text{H}$  NMR (400 MHz,  $\text{CDCl}_3$ ) of 1-(3,4-dimethoxyphenyl)-3-(4-fluorophenyl)-1H-1,2,4-triazole (4c):**

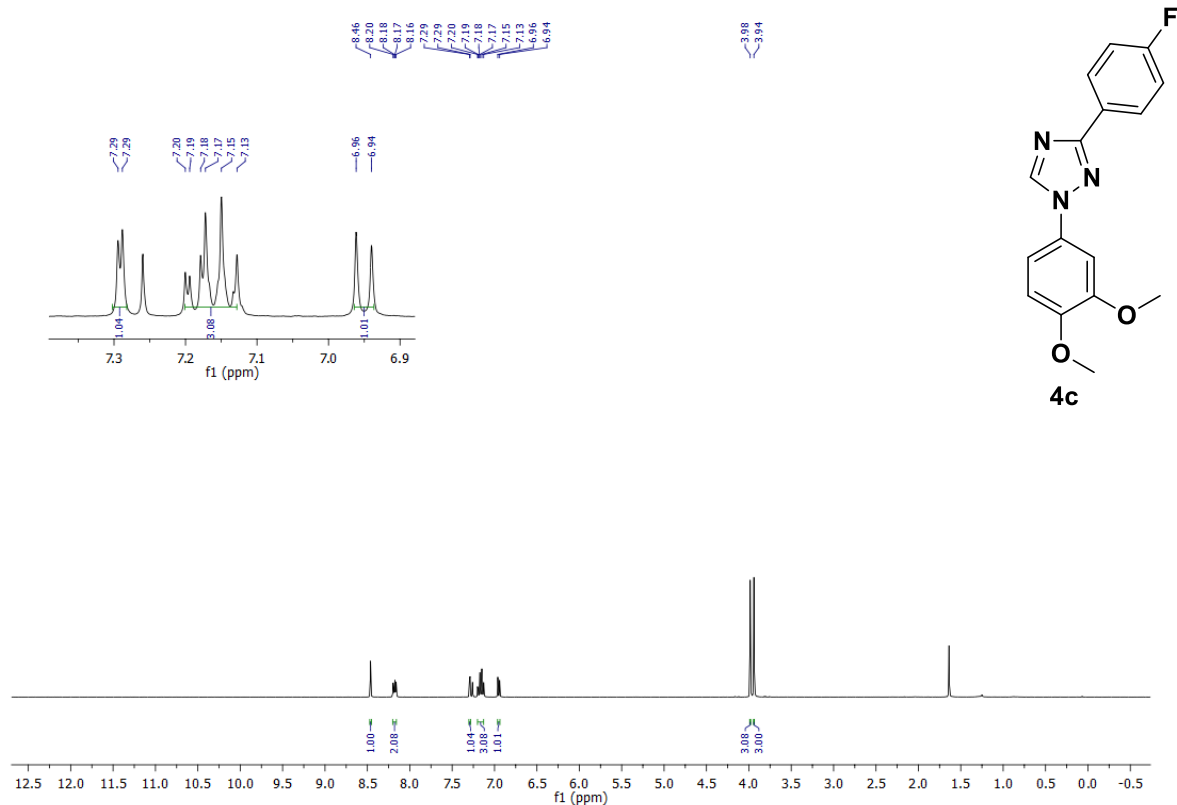

**$^{13}\text{C}\{^1\text{H}\}$  NMR (101 MHz,  $\text{CDCl}_3$ ) of 1-(3,4-dimethoxyphenyl)-3-(4-fluorophenyl)-1H-1,2,4-triazole (4c):**

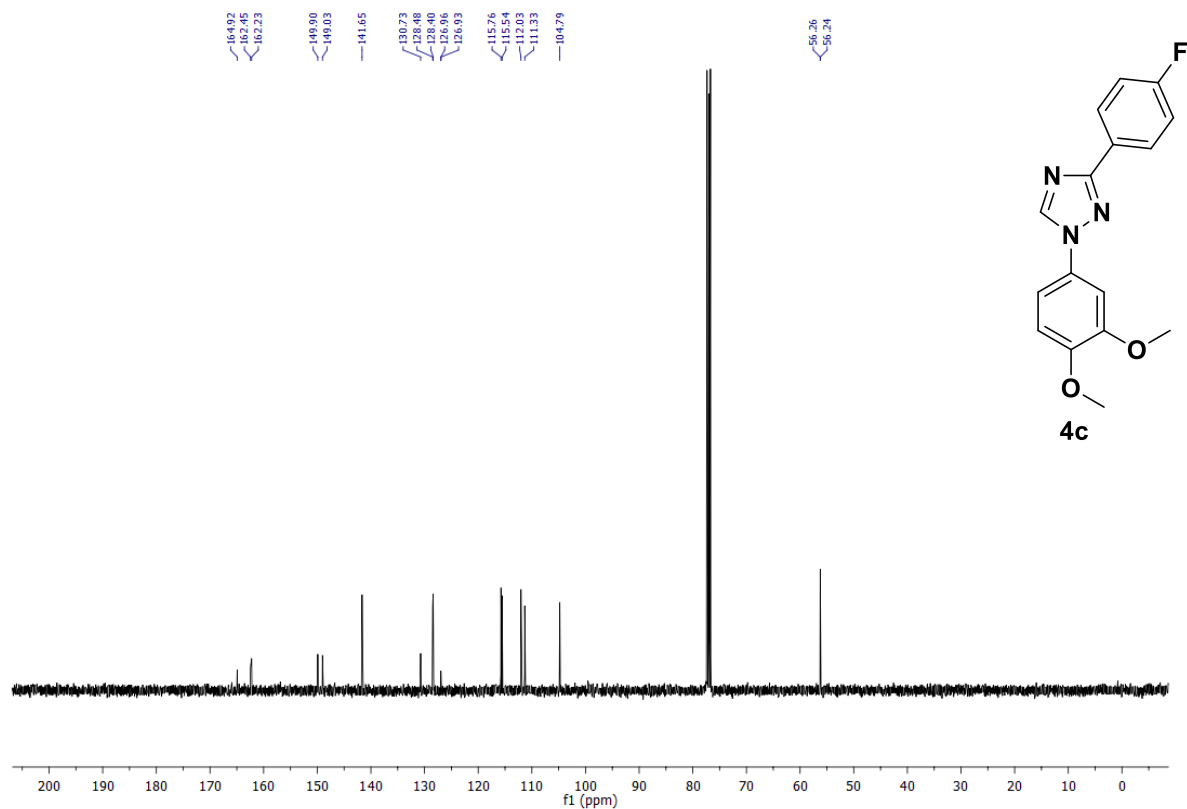

**<sup>19</sup>F NMR (377 MHz, CDCl<sub>3</sub>) of 1-(3,4-dimethoxyphenyl)-3-(4-fluorophenyl)-1*H*-1,2,4-triazole (4c):**

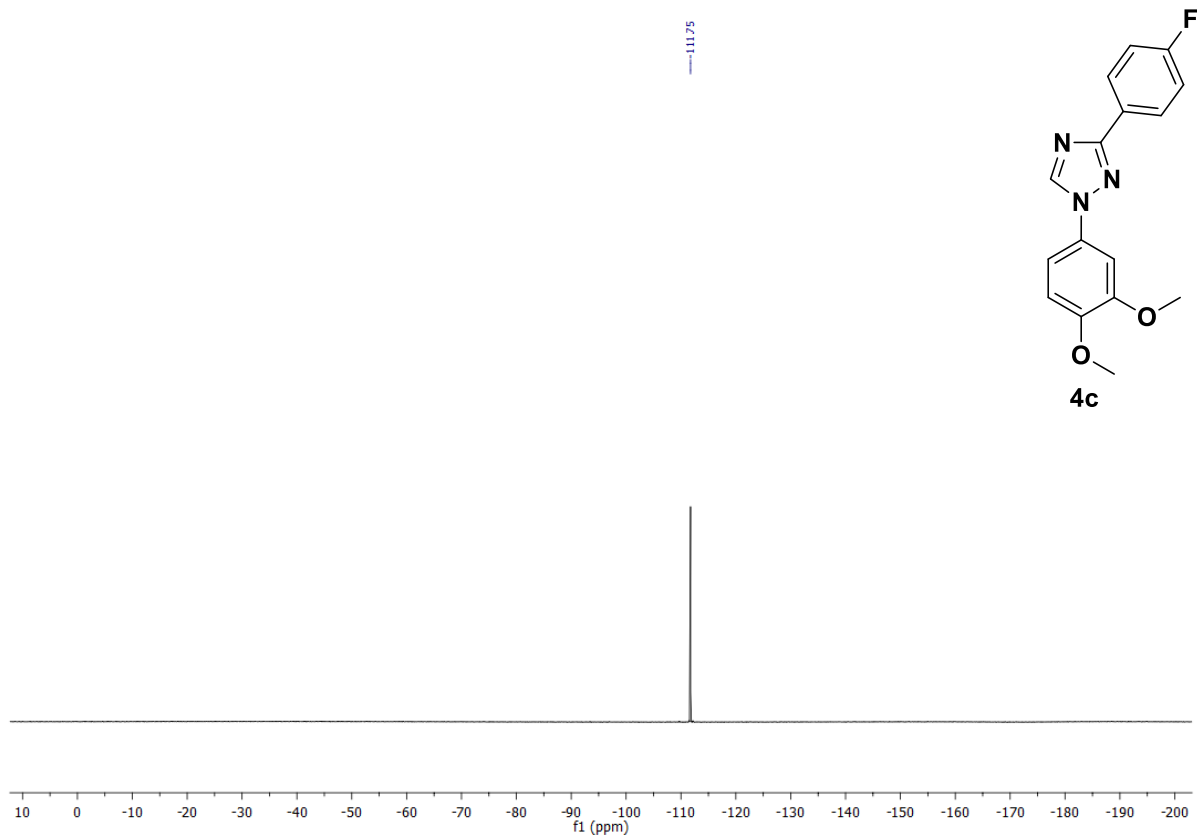

**<sup>1</sup>H NMR (400 MHz, CDCl<sub>3</sub>) of 1-(3,4-dimethoxyphenyl)-3-(4-(trifluoromethyl)phenyl)-1H-1,2,4-triazole (4d):**

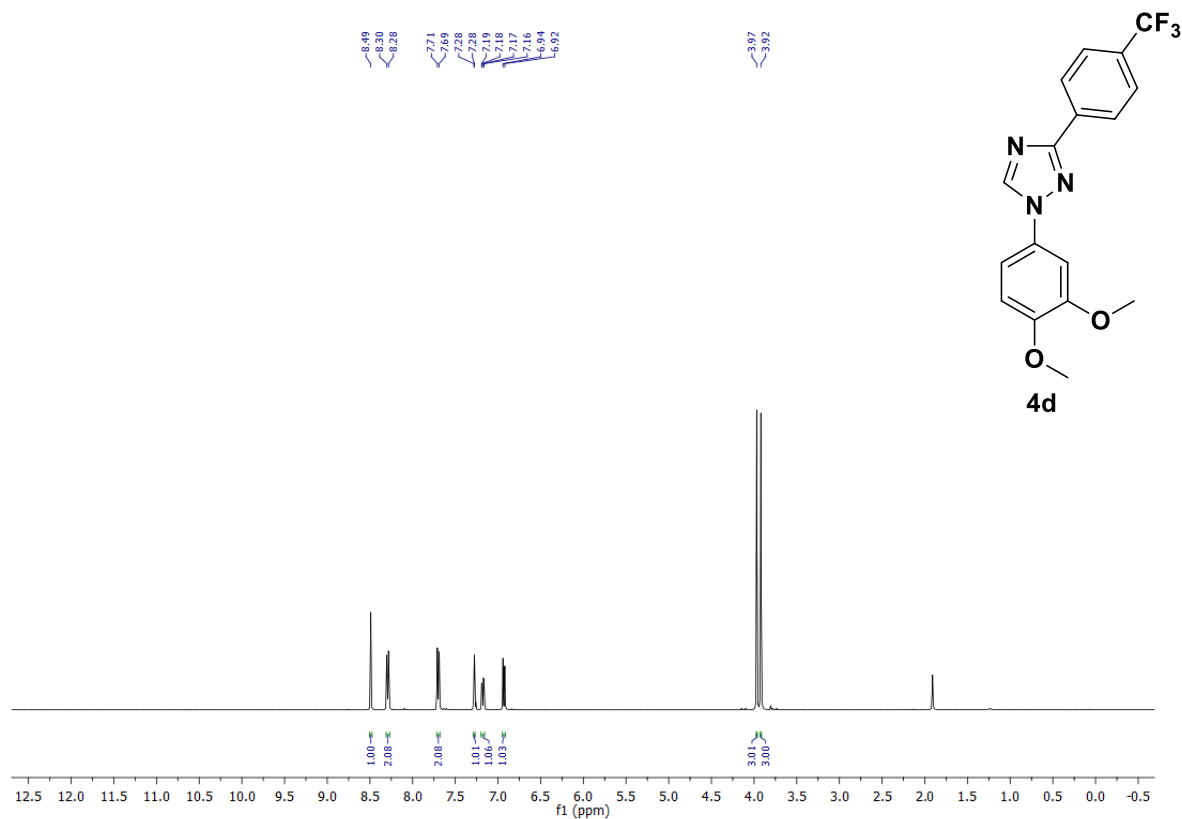

**<sup>13</sup>C{<sup>1</sup>H} NMR (101 MHz, CDCl<sub>3</sub>) of 1-(3,4-dimethoxyphenyl)-3-(4-(trifluoromethyl)phenyl)-1H-1,2,4-triazole (4d):**

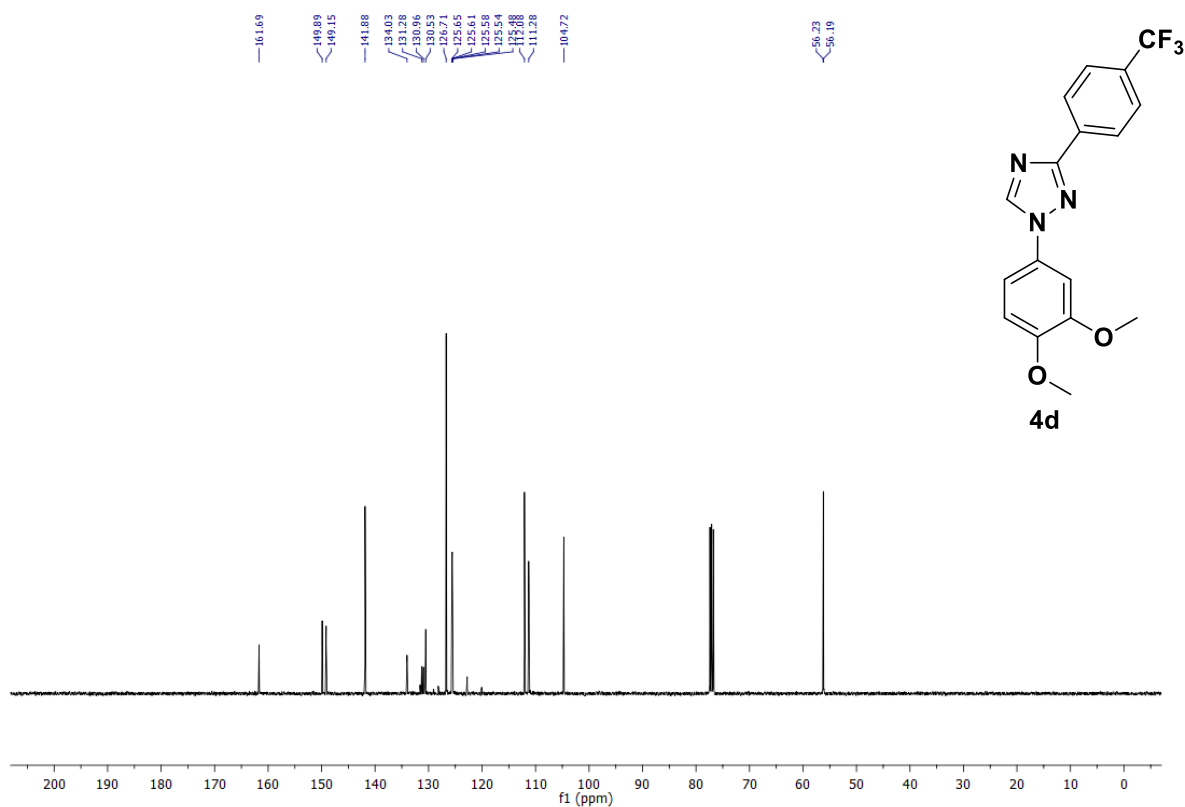

**<sup>19</sup>F NMR (377 MHz, CDCl<sub>3</sub>) of 1-(3,4-dimethoxyphenyl)-3-(4-(trifluoromethyl)phenyl)-1H-1,2,4-triazole (4d):**

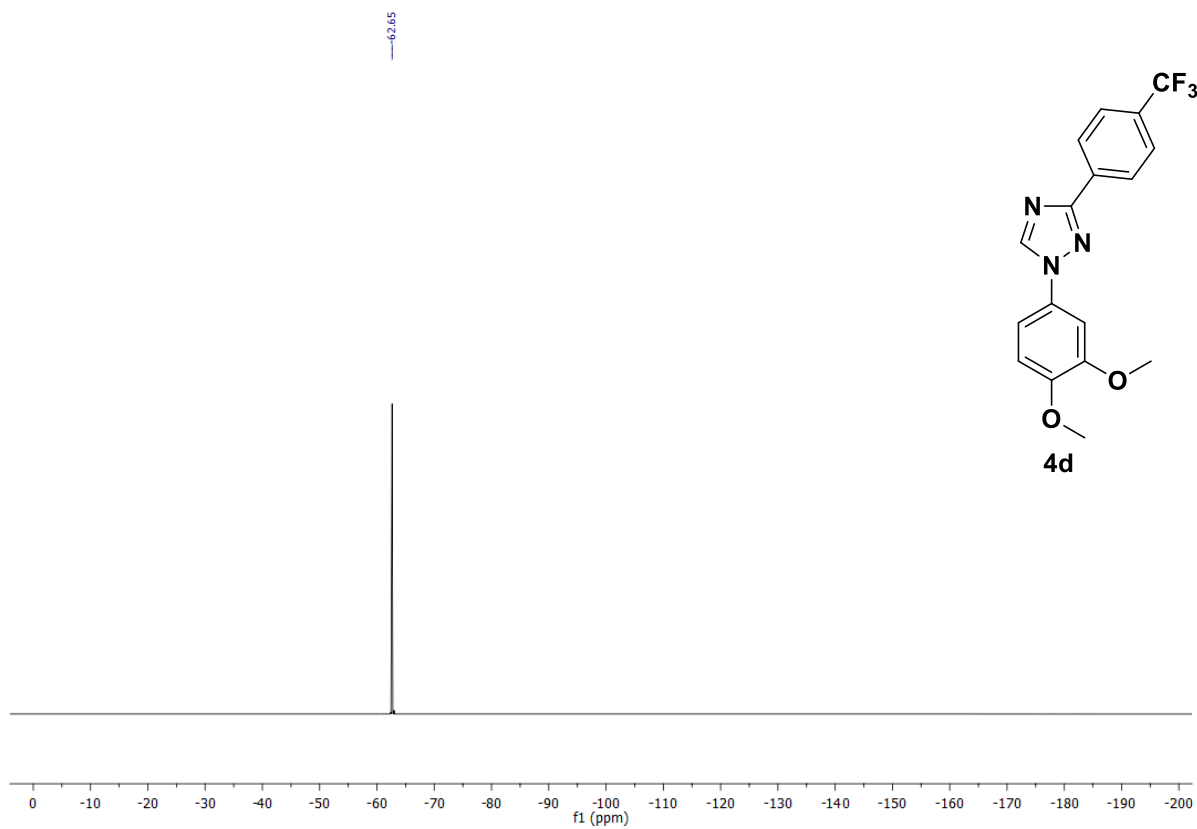

**<sup>1</sup>H NMR (400 MHz, CDCl<sub>3</sub>) of 1-(3,4-dimethoxyphenyl)-3-(3-(trifluoromethyl)phenyl)-1H-1,2,4-triazole (4e):**

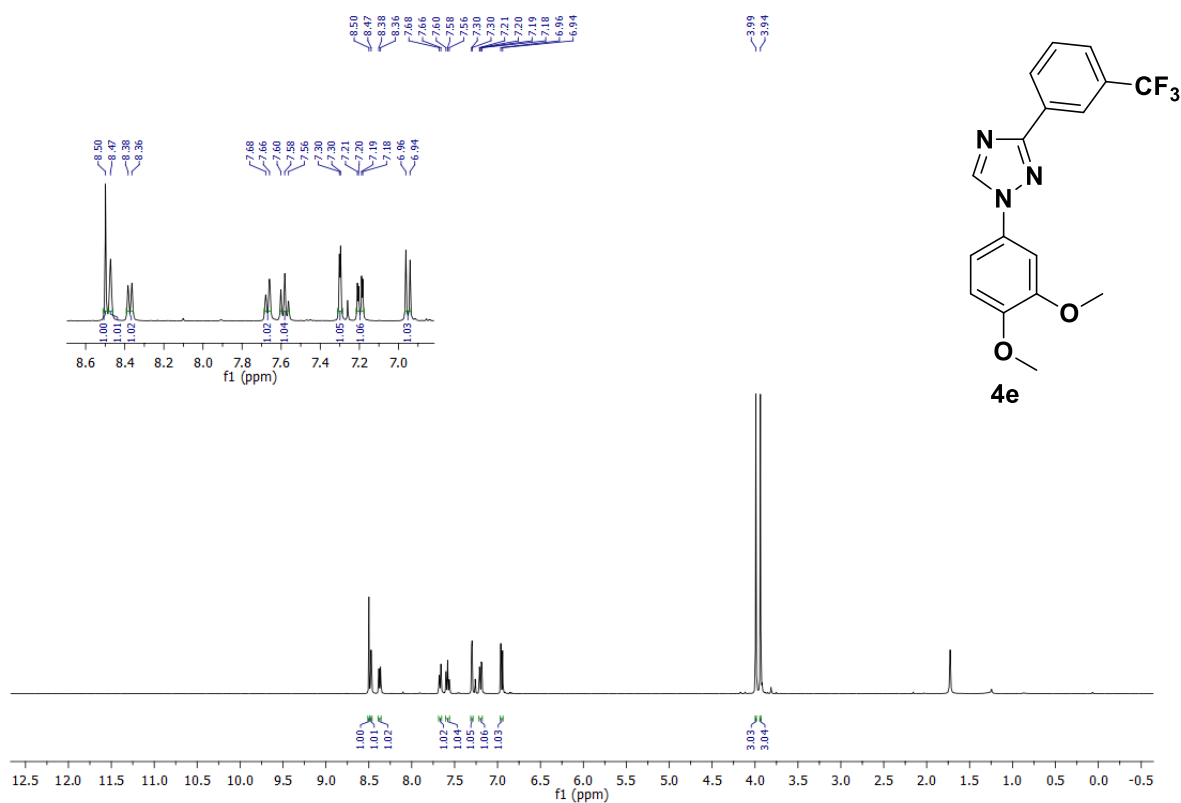

**<sup>13</sup>C{<sup>1</sup>H} NMR (101 MHz, CDCl<sub>3</sub>) of 1-(3,4-dimethoxyphenyl)-3-(3-(trifluoromethyl)phenyl)-1H-1,2,4-triazole (4e):**

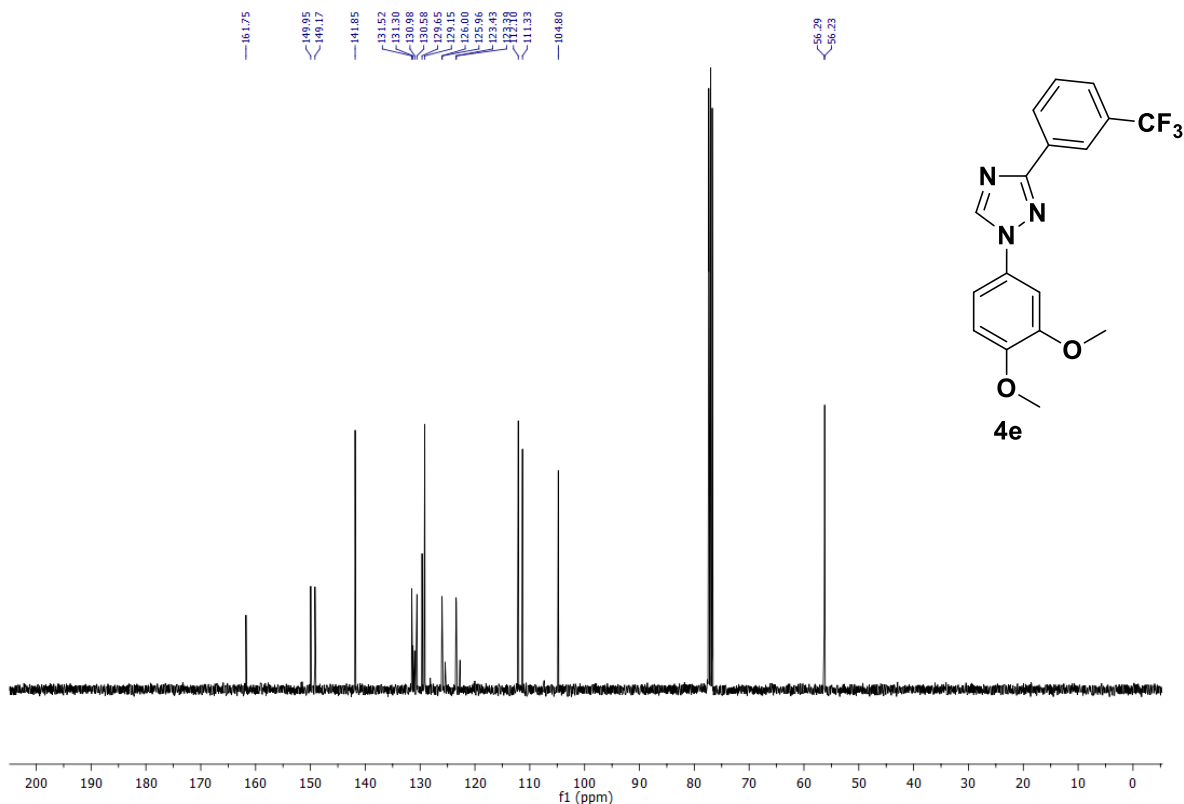

**<sup>19</sup>F NMR (377 MHz, CDCl<sub>3</sub>) of 1-(3,4-dimethoxyphenyl)-3-(3-(trifluoromethyl)phenyl)-1H-1,2,4-triazole (4e):**

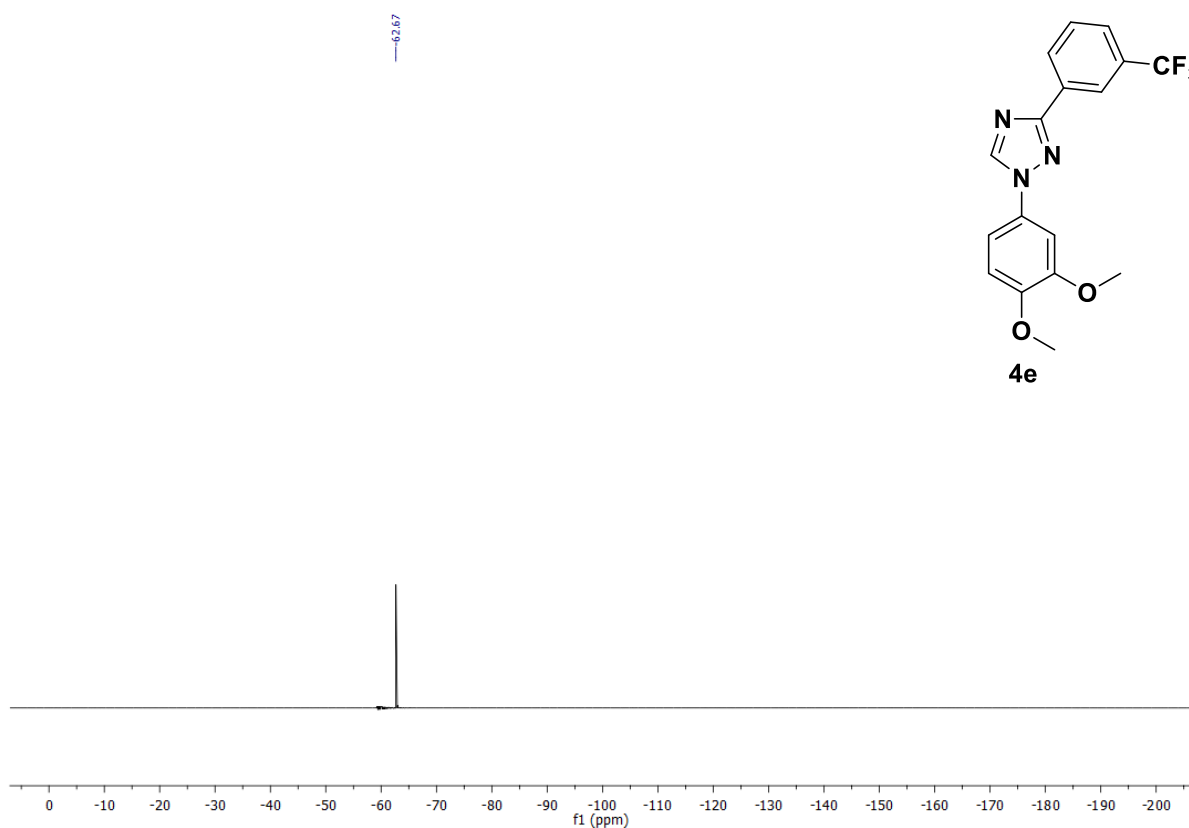

**<sup>1</sup>H NMR (400 MHz, CDCl<sub>3</sub>) of 3-(3,4-difluorophenyl)-1-(3,4-dimethoxyphenyl)-1*H*-1,2,4-triazole (4f):**

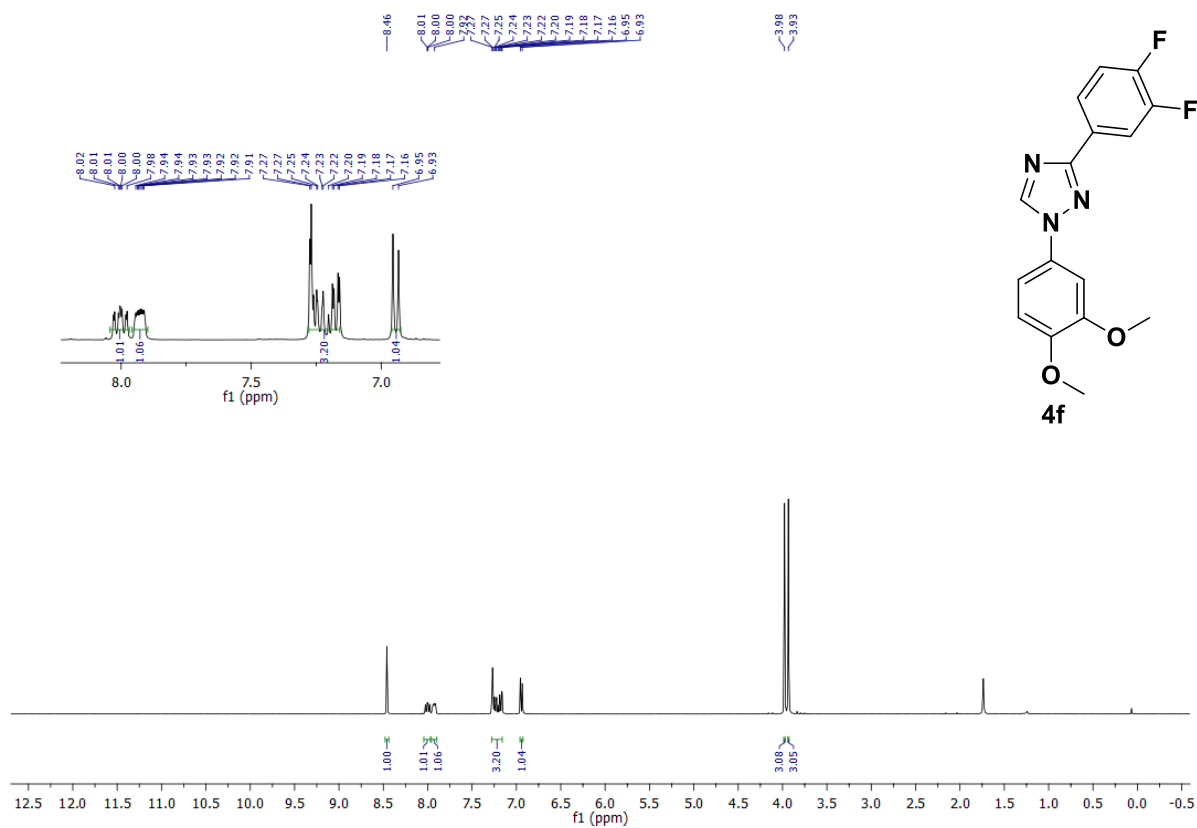

**<sup>13</sup>C{<sup>1</sup>H} NMR (101 MHz, CDCl<sub>3</sub>) of 3-(3,4-difluorophenyl)-1-(3,4-dimethoxyphenyl)-1*H*-1,2,4-triazole (4f):**

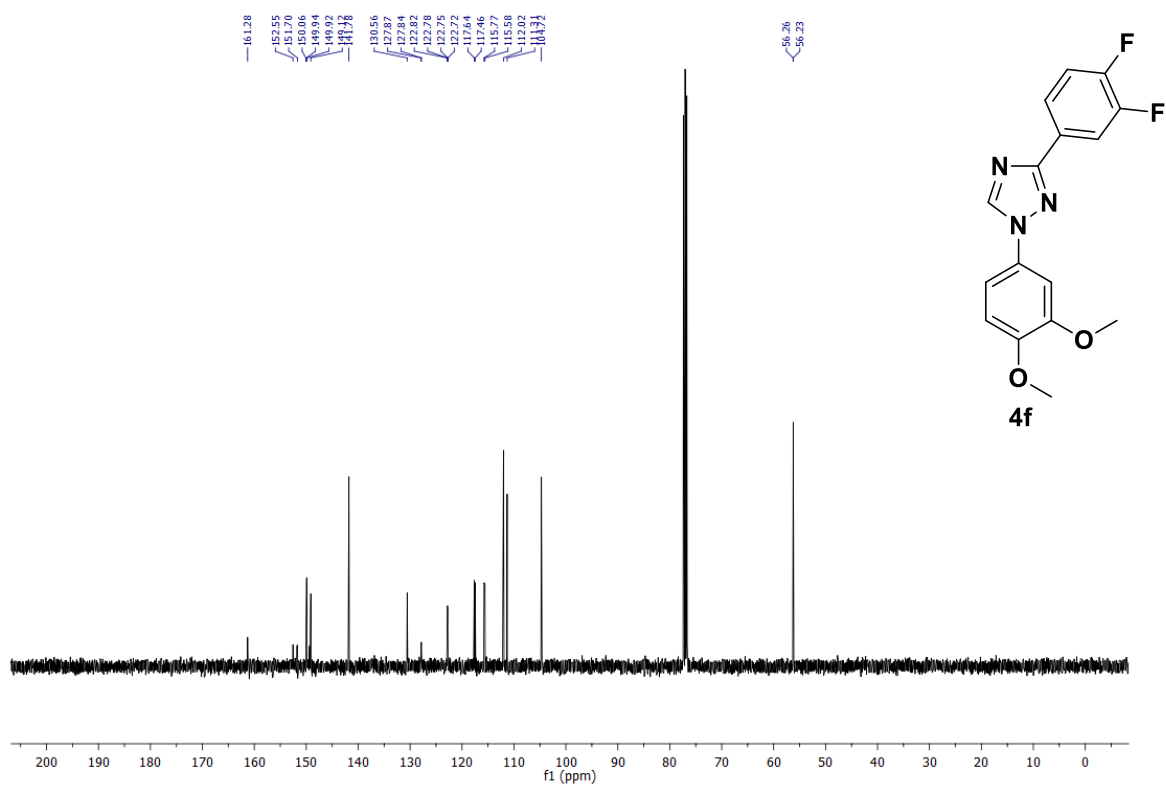

**<sup>19</sup>F NMR (377 MHz, CDCl<sub>3</sub>) of 3-(3,4-difluorophenyl)-1-(3,4-dimethoxyphenyl)-1H-1,2,4-triazole (4f):**

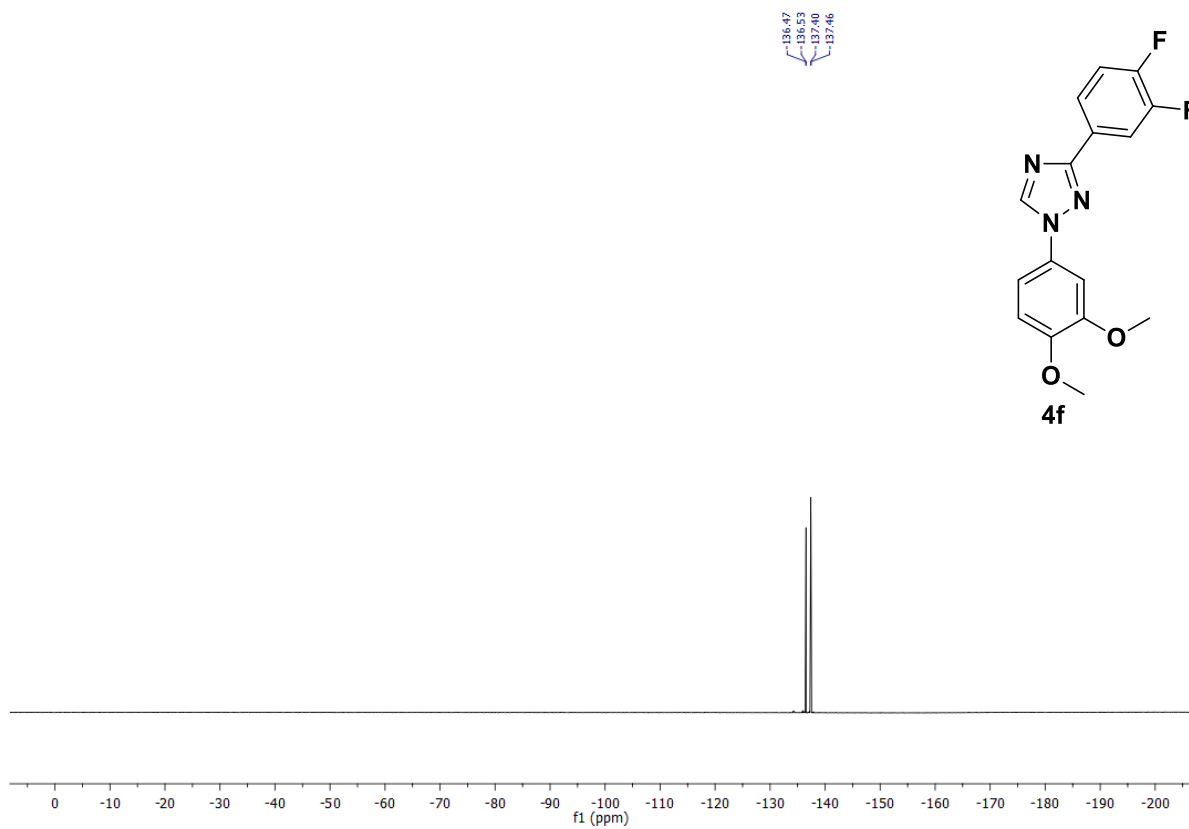



**<sup>1</sup>H NMR (400 MHz, DMSO-*d*<sub>6</sub>) of 1,3-bis(benzo[*d*][1,3]dioxol-5-yl)-1*H*-1,2,4-triazole (4g):**

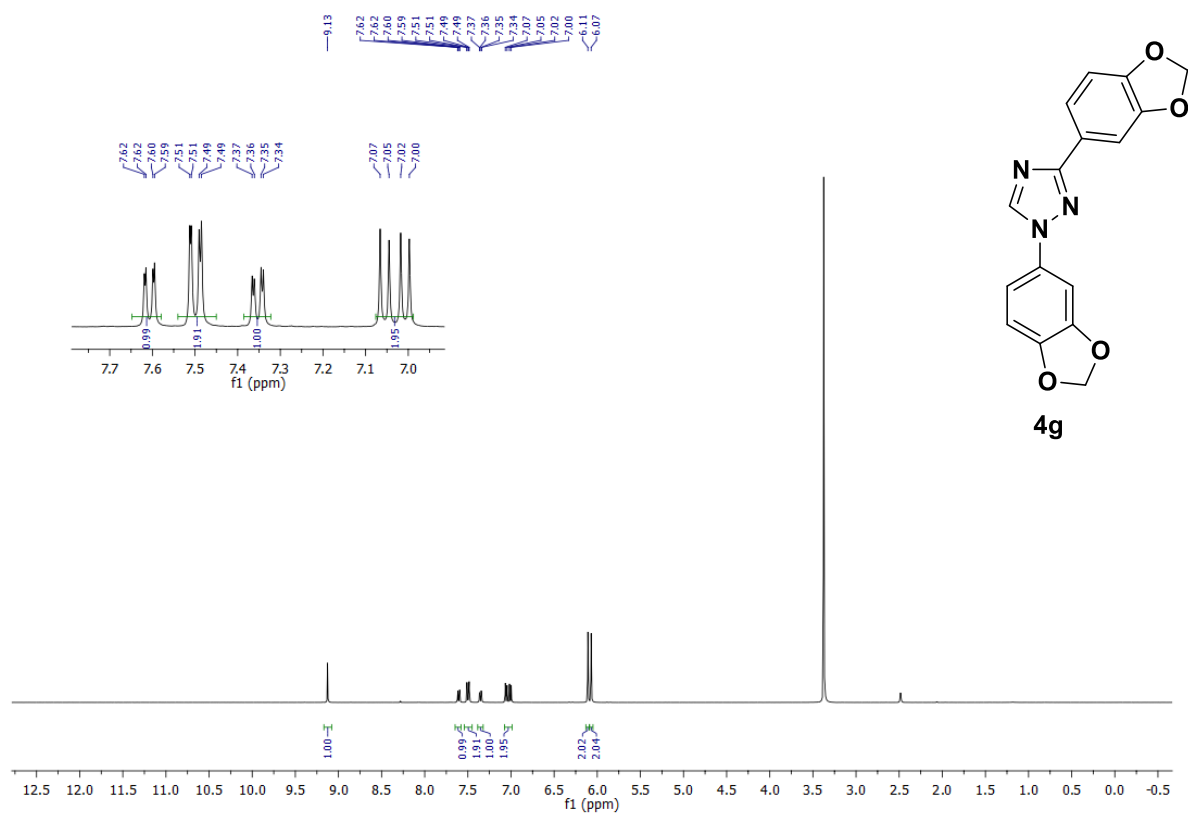

**<sup>13</sup>C{<sup>1</sup>H} NMR (101 MHz, DMSO-*d*<sub>6</sub>) of 1,3-bis(benzo[*d*][1,3]dioxol-5-yl)-1*H*-1,2,4-triazole (4g):**

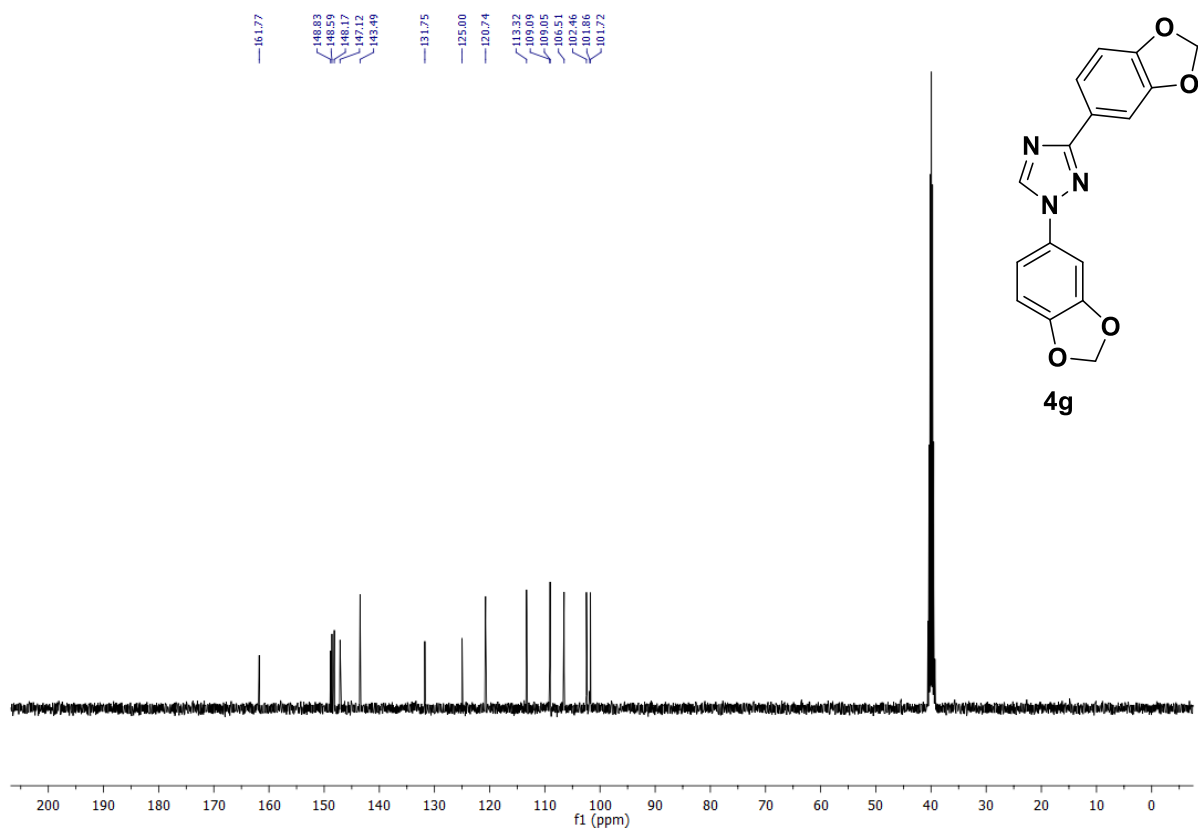

**<sup>1</sup>H NMR (400 MHz, CDCl<sub>3</sub>) of 1-(benzo[d][1,3]dioxol-5-yl)-3-(naphthalen-1-yl)-1*H*-1,2,4-triazole (4h):**

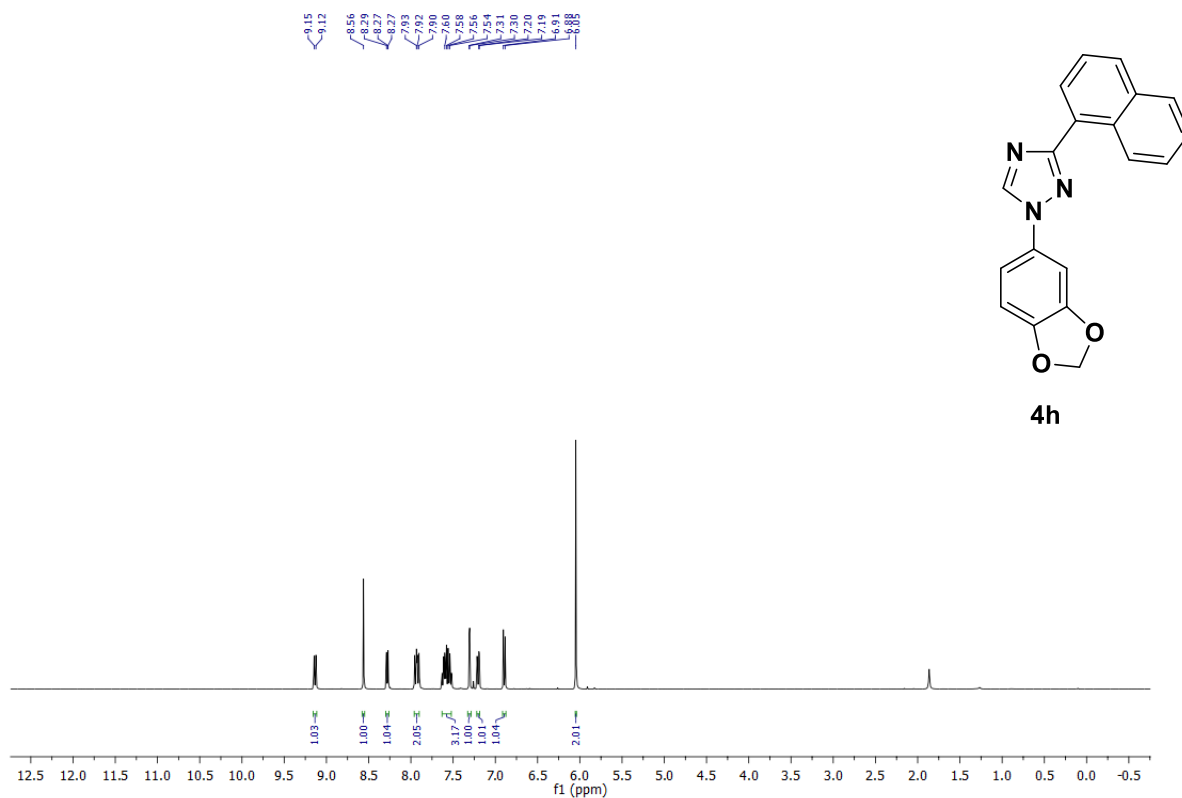

**<sup>13</sup>C{<sup>1</sup>H} NMR (101 MHz, CDCl<sub>3</sub>) of 1-(benzo[d][1,3]dioxol-5-yl)-3-(naphthalen-1-yl)-1*H*-1,2,4-triazole (4h):**

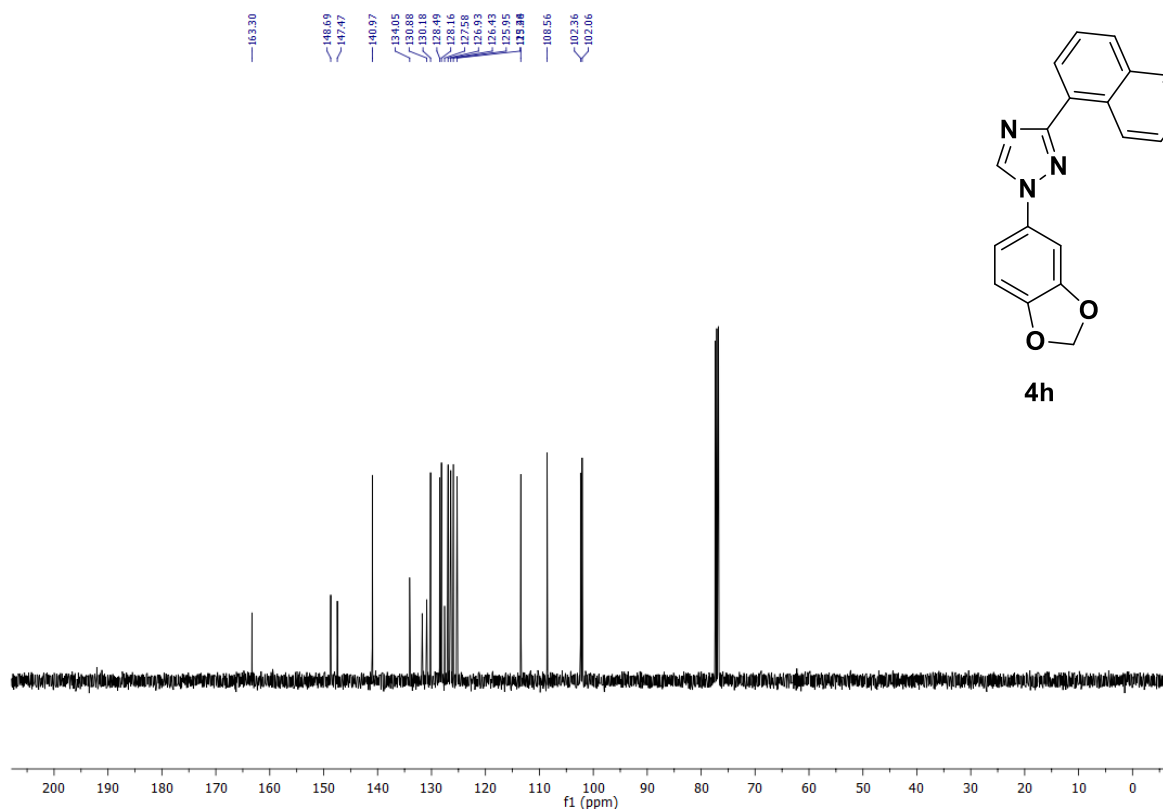

**<sup>1</sup>H NMR (400 MHz, CDCl<sub>3</sub>) 3-(4-fluorophenyl)-1-(3,4,5-trimethoxyphenyl)-1*H*-1,2,4-triazole (4i):**

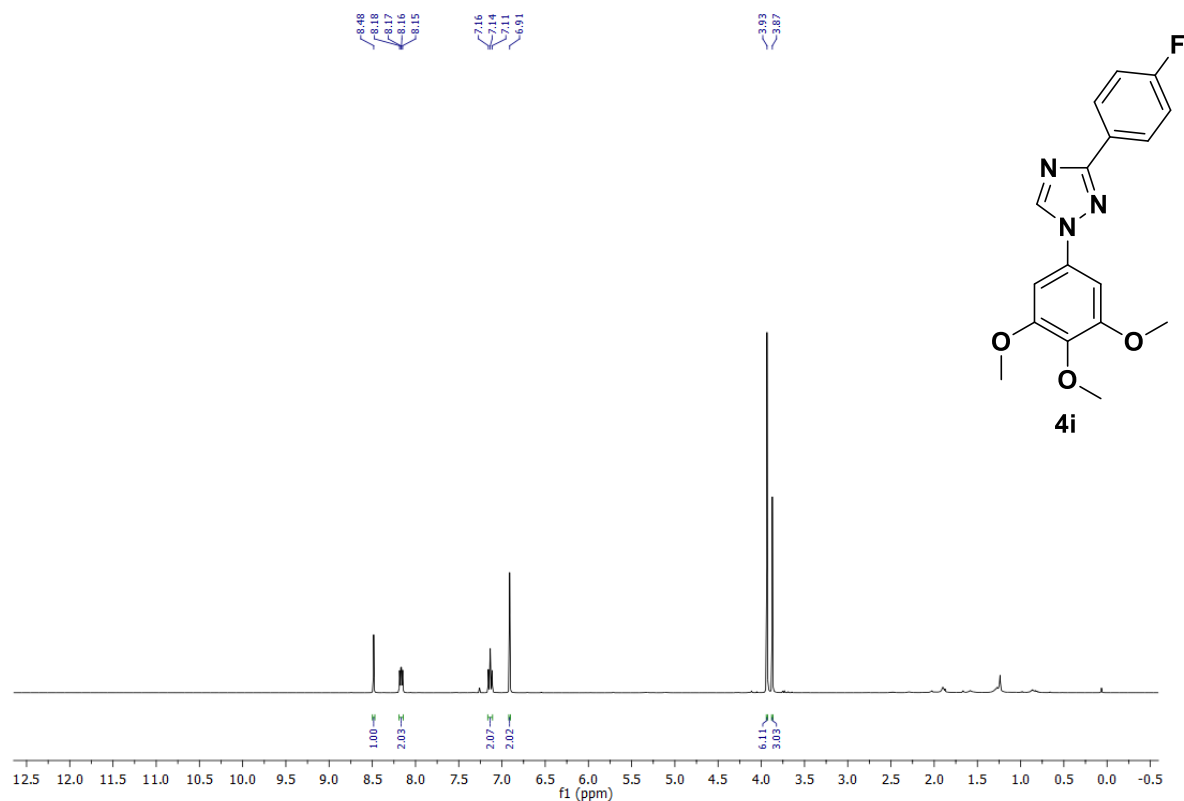

**<sup>13</sup>C{<sup>1</sup>H} NMR (101 MHz, CDCl<sub>3</sub>) of 3-(4-fluorophenyl)-1-(3,4,5-trimethoxyphenyl)-1*H*-1,2,4-triazole (4i):**

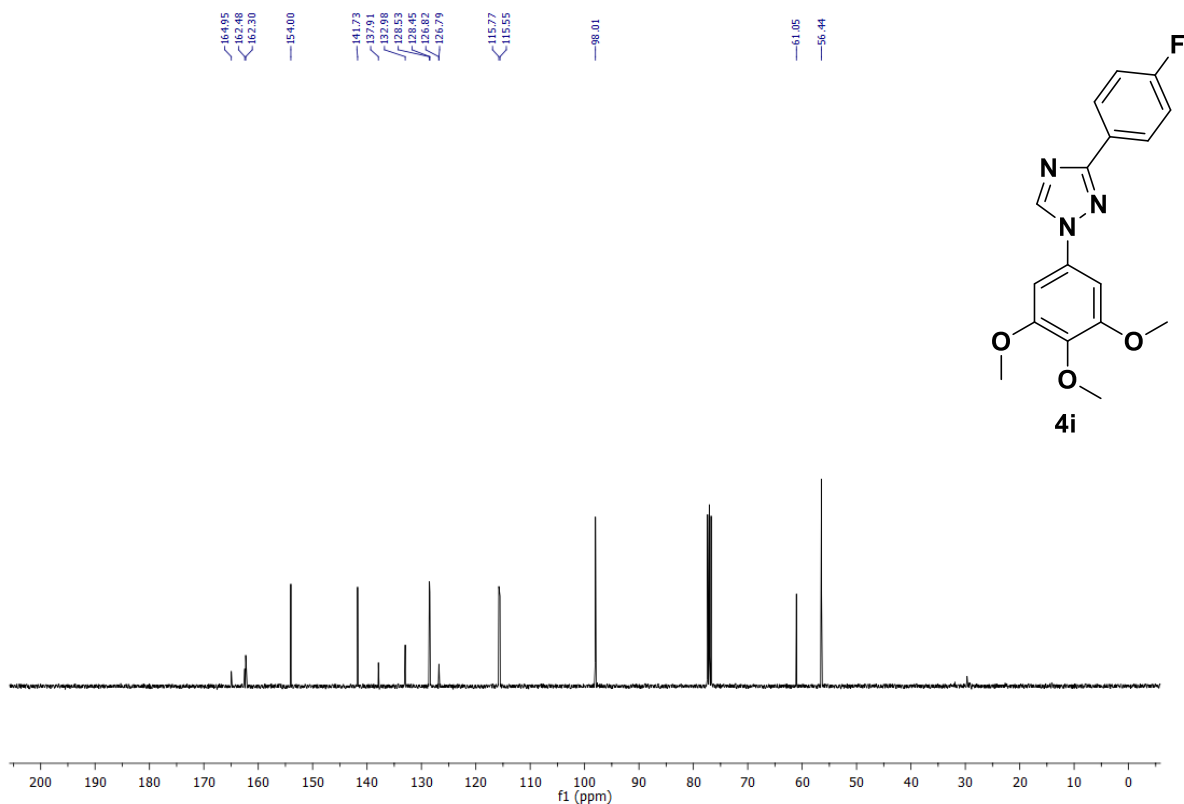

**<sup>19</sup>F NMR (377 MHz, CDCl<sub>3</sub>) of 3-(4-fluorophenyl)-1-(3,4,5-trimethoxyphenyl)-1*H*-1,2,4-triazole (4i):**

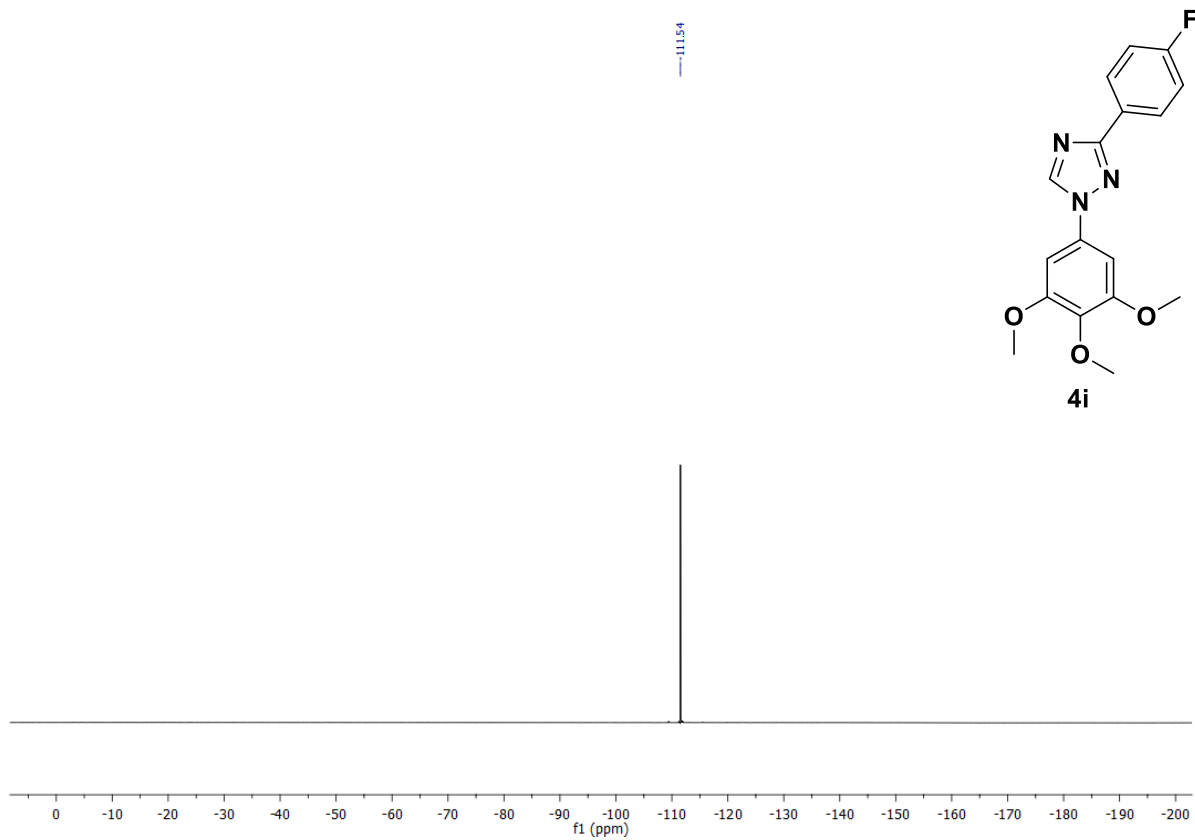

$^1\text{H}$  NMR (400 MHz,  $\text{CDCl}_3$ ) of 3-(1-(3,4,5-trimethoxyphenyl)-1H-1,2,4-triazol-3-yl)phenol (4j):

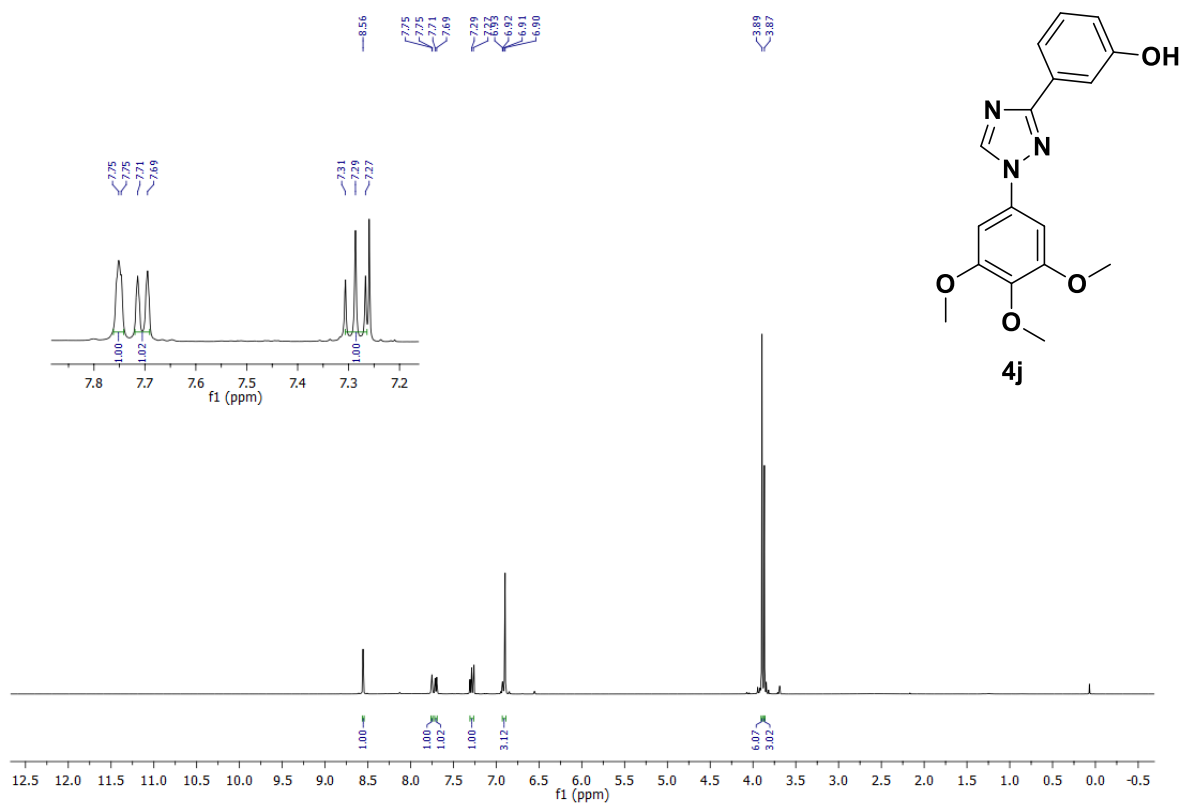

$^{13}\text{C}\{^1\text{H}\}$  NMR (101 MHz,  $\text{CDCl}_3$ ) of 3-(1-(3,4,5-trimethoxyphenyl)-1H-1,2,4-triazol-3-yl)phenol (4j):

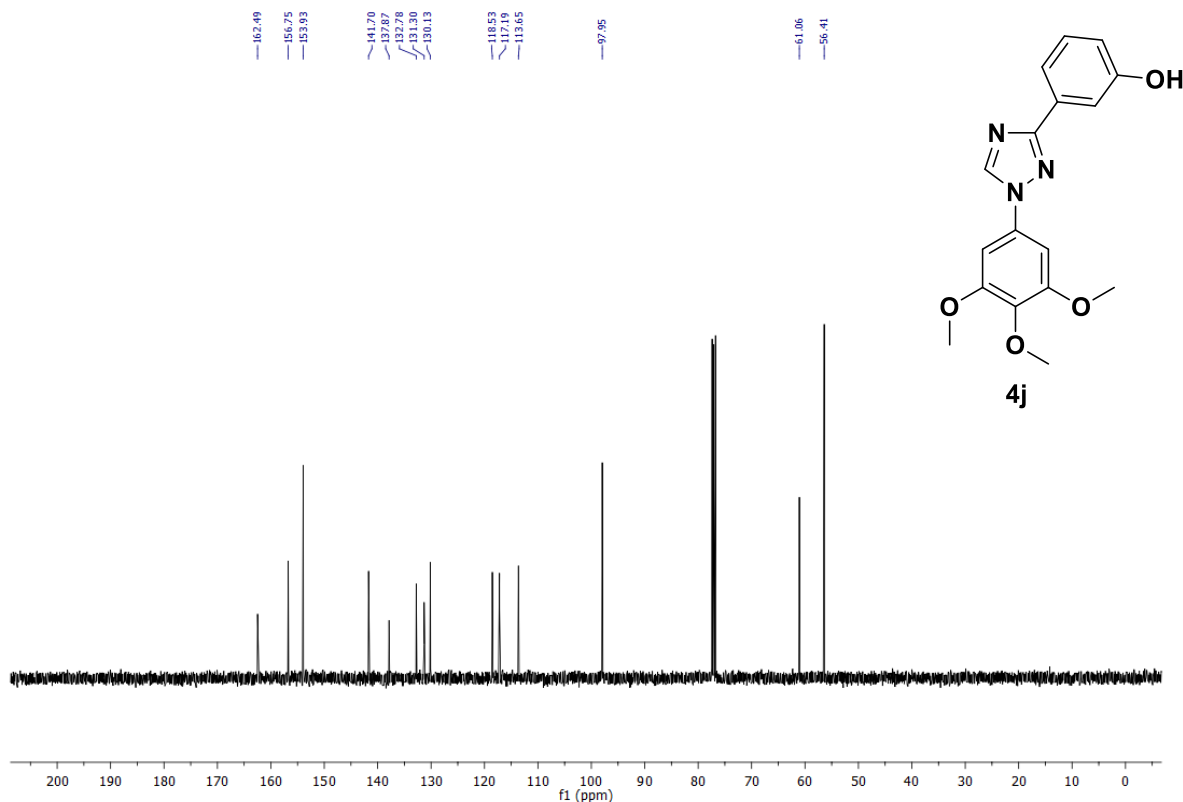

$^1\text{H}$  NMR (400 MHz,  $\text{CDCl}_3$ ) of 3-(1-(3,4,5-trimethoxyphenyl)-1*H*-1,2,4-triazol-3-yl)aniline (4k):

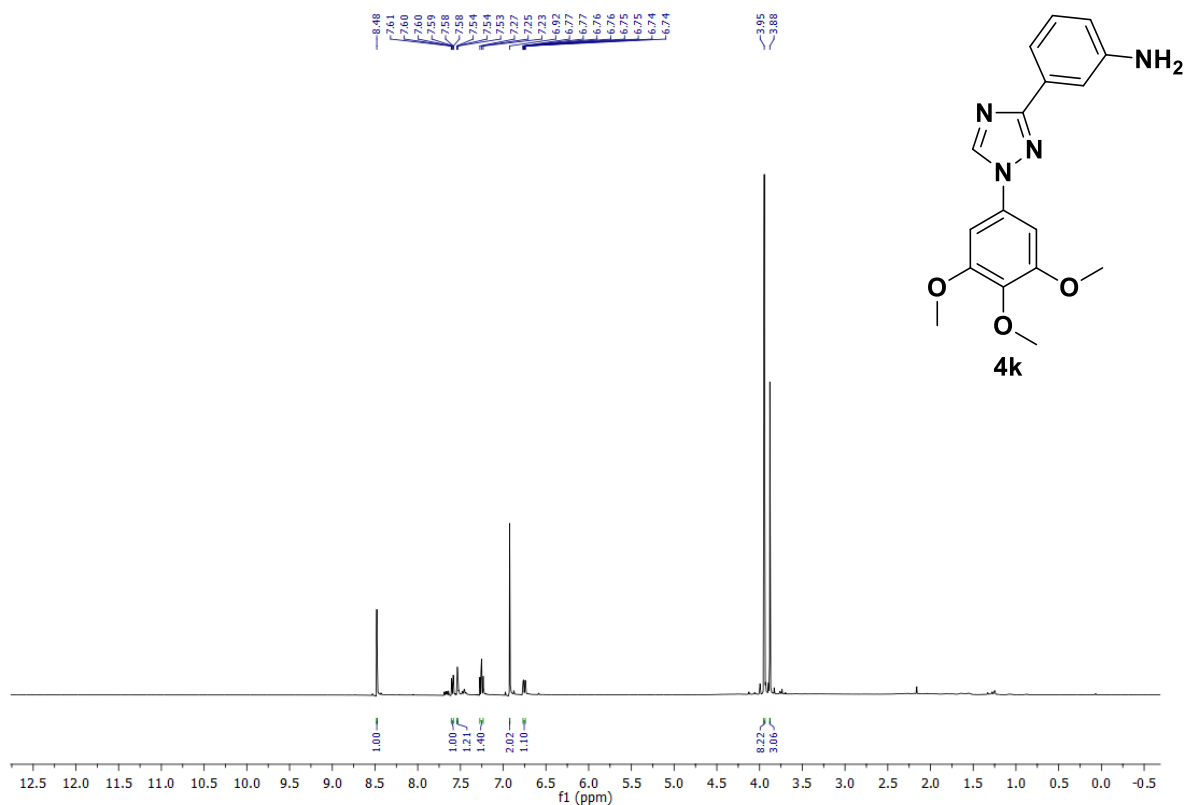

$^{13}\text{C}\{^1\text{H}\}$  NMR (101 MHz,  $\text{CDCl}_3$ ) of 3-(1-(3,4,5-trimethoxyphenyl)-1*H*-1,2,4-triazol-3-yl)aniline (4k):

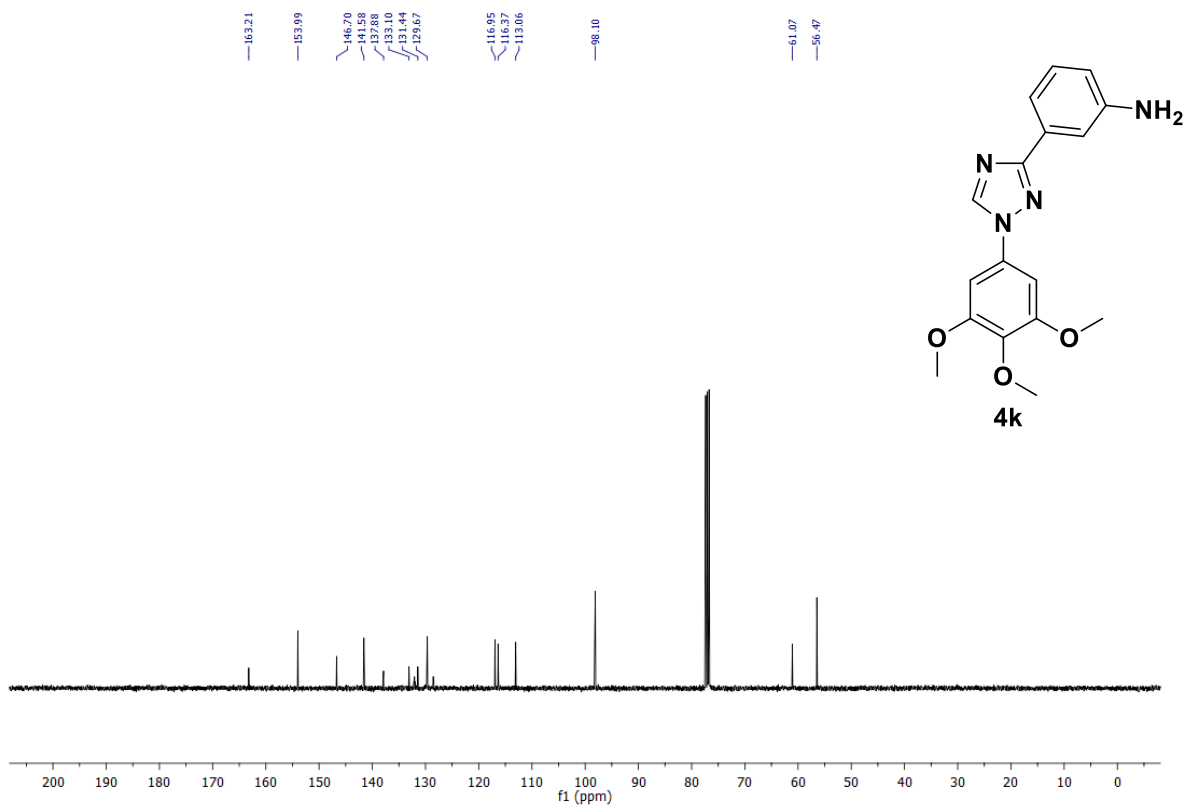

**$^1\text{H}$  NMR (400 MHz,  $\text{CDCl}_3$ ) 3-(3-methoxyphenyl)-1-(3,4,5-trimethoxyphenyl)-1*H*-1,2,4-triazole (4l):**

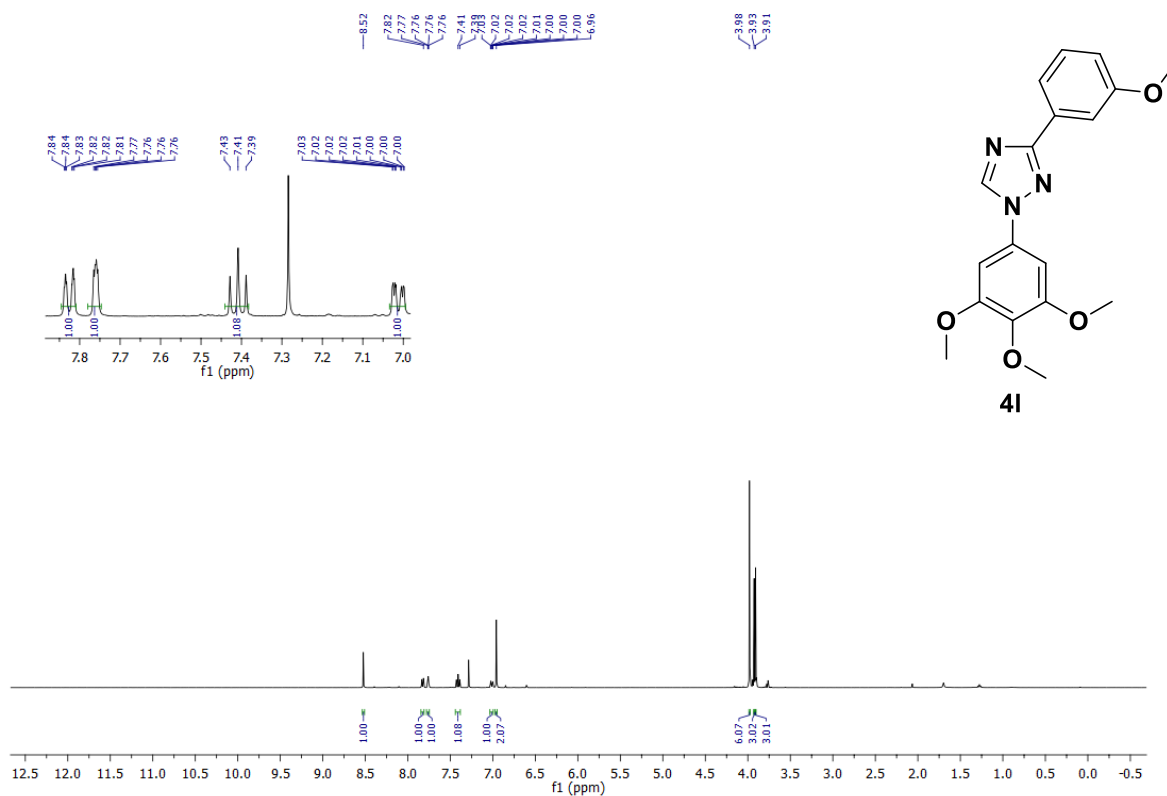

**$^{13}\text{C}\{^1\text{H}\}$  NMR (101 MHz,  $\text{CDCl}_3$ ) of 3-(3-methoxyphenyl)-1-(3,4,5-trimethoxyphenyl)-1*H*-1,2,4-triazole (4l):**

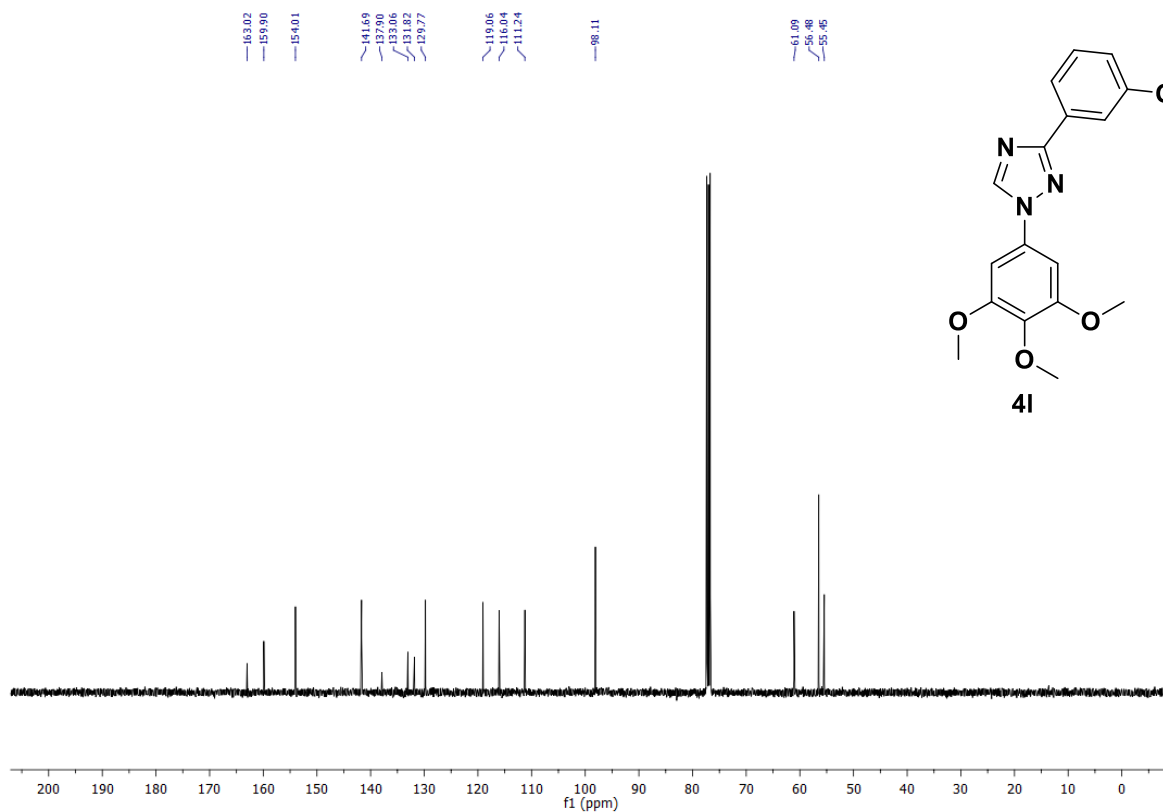

**$^1\text{H}$  NMR (400 MHz,  $\text{CDCl}_3$ ) 3-(3-(trifluoromethyl)phenyl)-1-(3,4,5-trimethoxyphenyl)-1*H*-1,2,4-triazole (4m):**

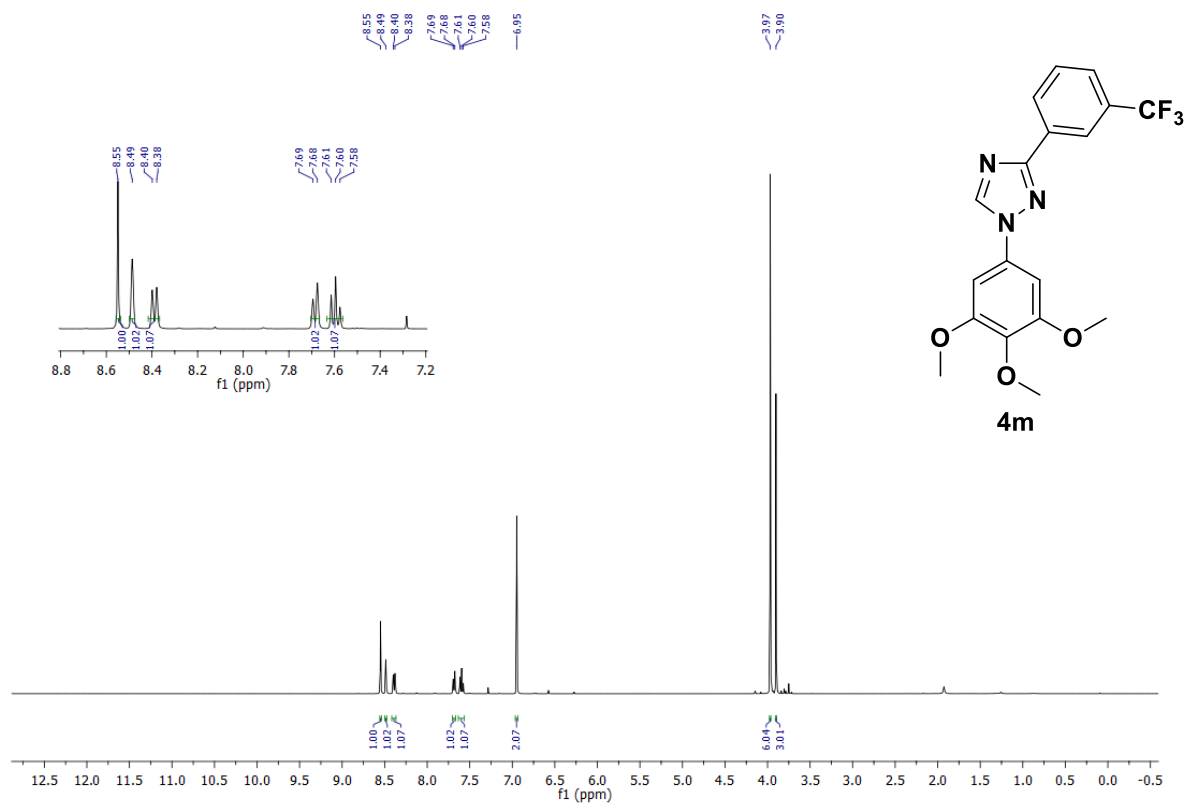

**$^{13}\text{C}\{^1\text{H}\}$  NMR (101 MHz,  $\text{CDCl}_3$ ) of 3-(3-(trifluoromethyl)phenyl)-1-(3,4,5-trimethoxyphenyl)-1*H*-1,2,4-triazole (4m):**

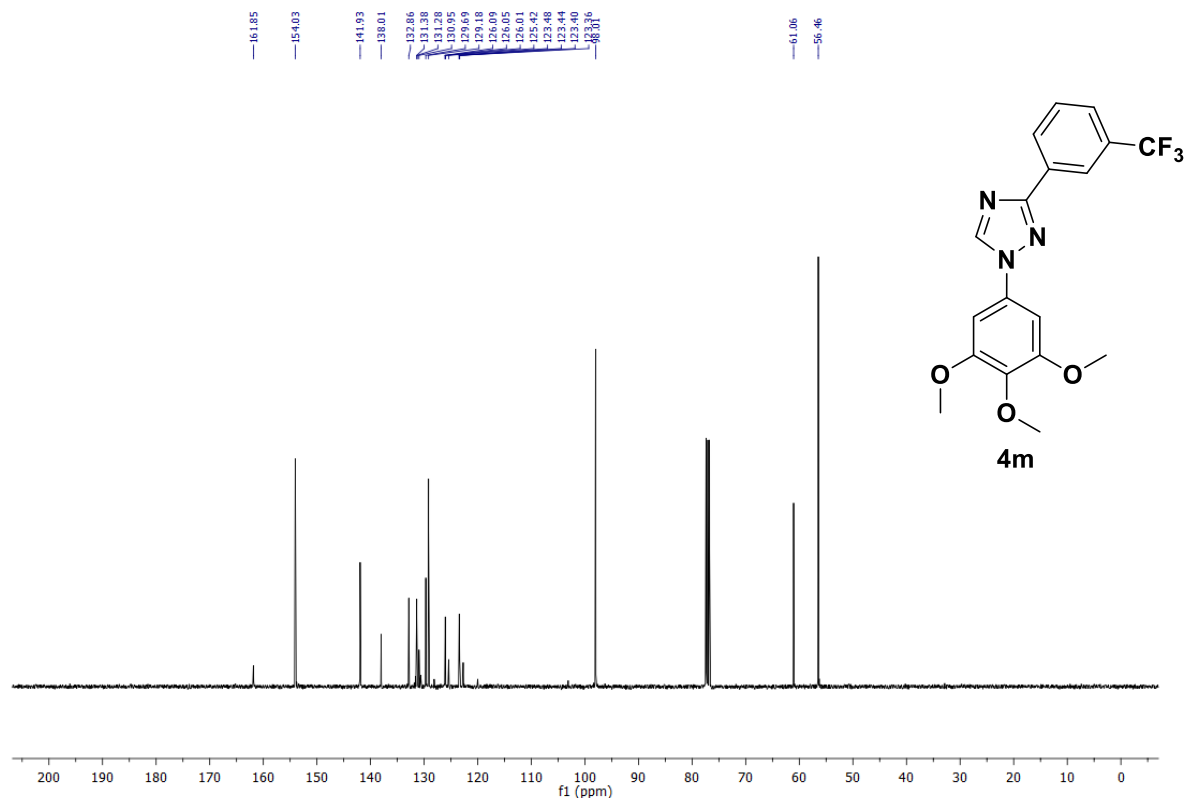



**<sup>19</sup>F NMR (377 MHz, CDCl<sub>3</sub>) of 3-(3-(trifluoromethyl)phenyl)-1-(3,4,5-trimethoxyphenyl)-1H-1,2,4-triazole (4m):**

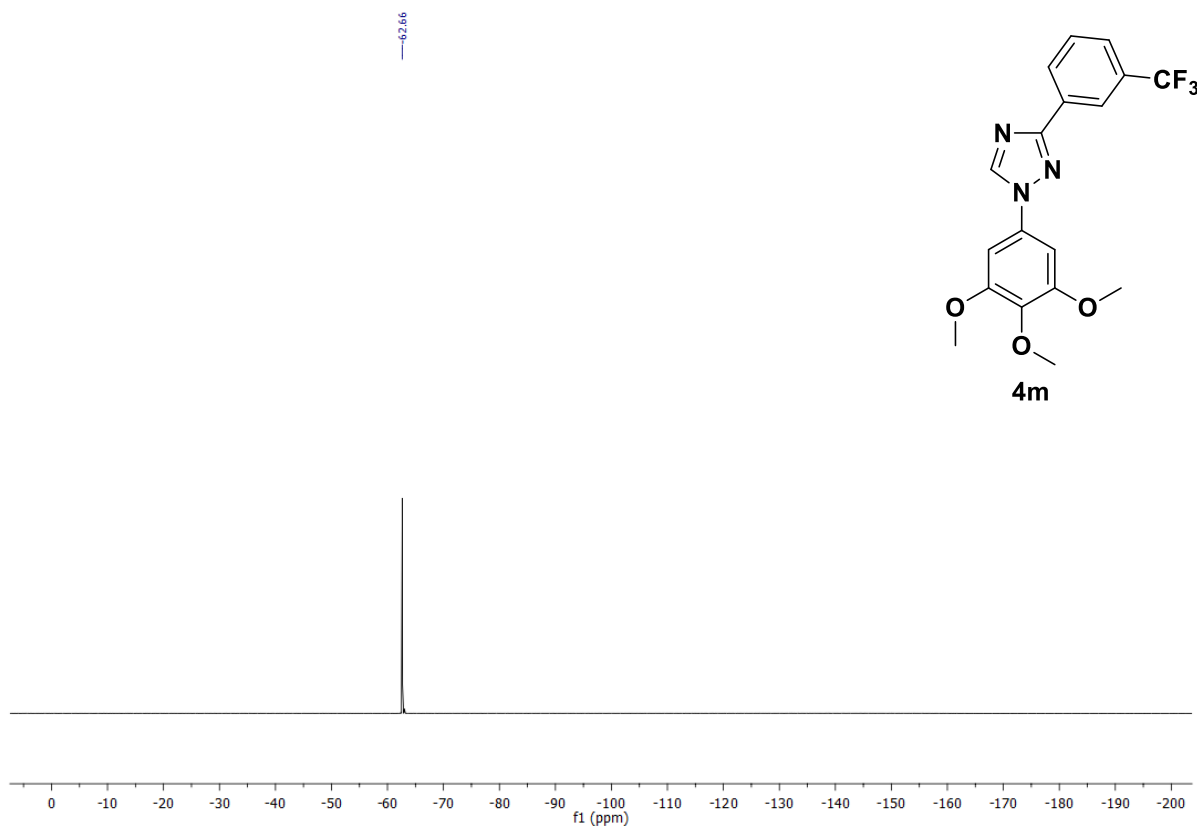

**$^1\text{H}$  NMR (400 MHz,  $\text{CDCl}_3$ ) 3-(1-(3,4,5-trimethoxyphenyl)-1*H*-1,2,4-triazol-3-yl)benzaldehyde (4n):**

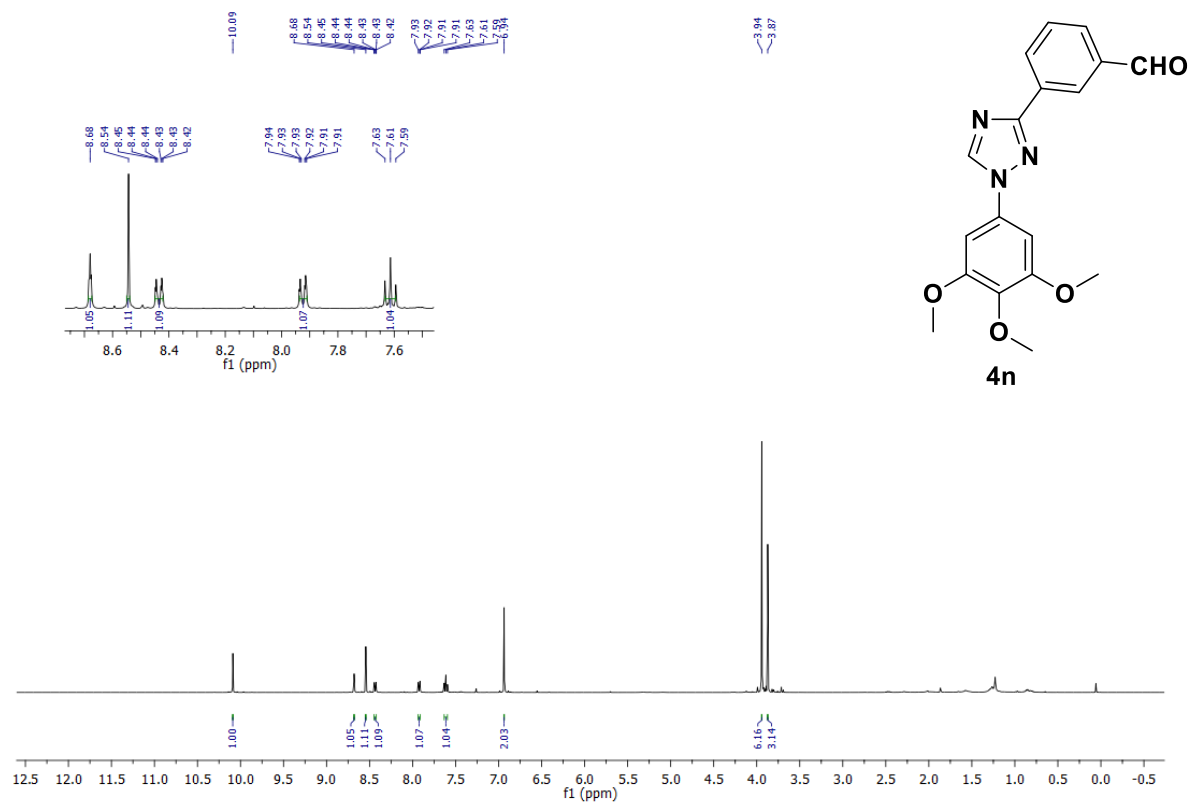

**$^{13}\text{C}\{^1\text{H}\}$  NMR (101 MHz,  $\text{CDCl}_3$ ) of 3-(1-(3,4,5-trimethoxyphenyl)-1*H*-1,2,4-triazol-3-yl)benzaldehyde (4n):**

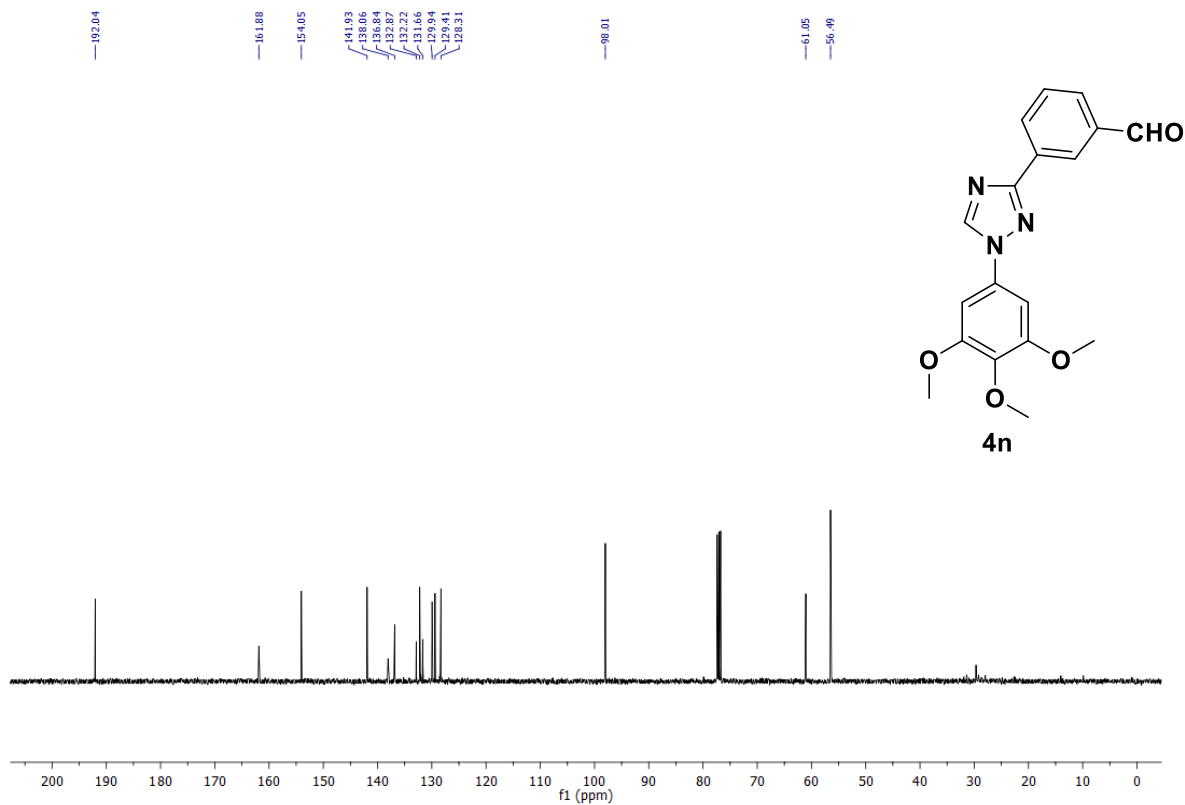

**<sup>1</sup>H NMR (400 MHz, CDCl<sub>3</sub>) 3-(3,4-dimethoxyphenyl)-1-(3,4,5-trimethoxyphenyl)-1*H*-1,2,4-triazole (4o):**

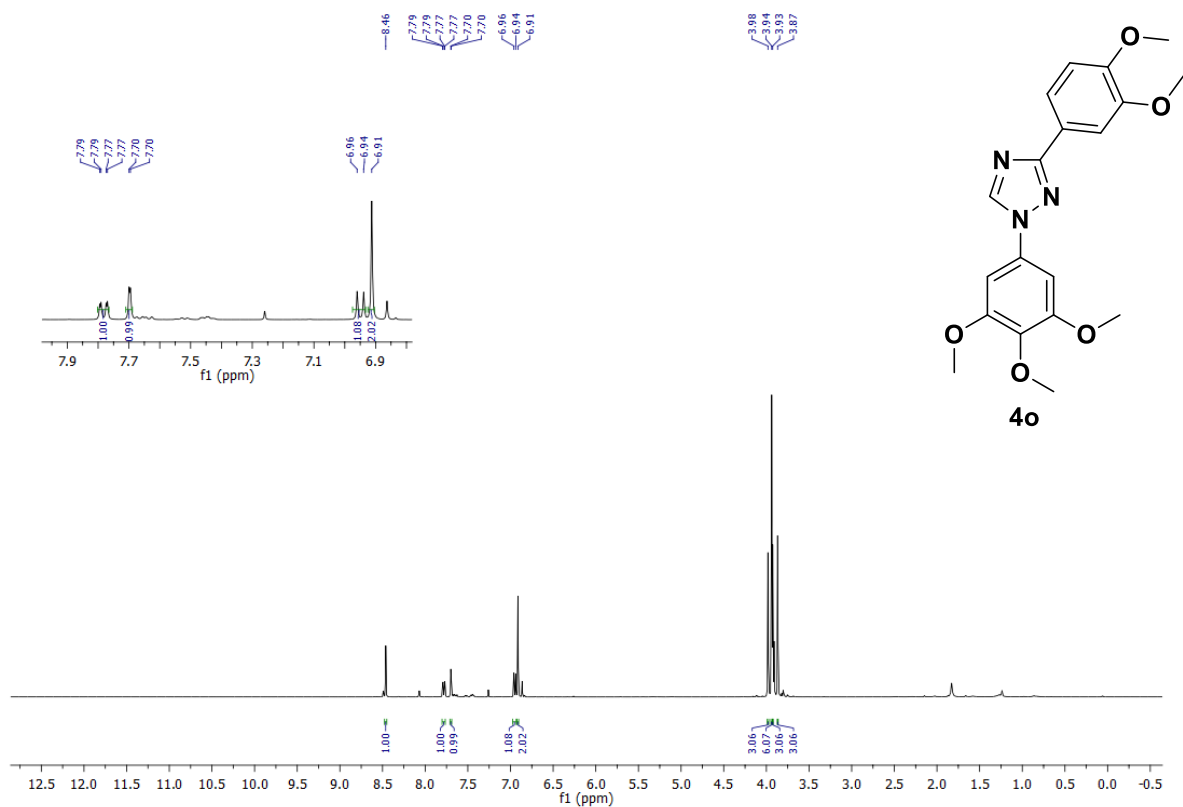

**<sup>13</sup>C{<sup>1</sup>H} NMR (101 MHz, CDCl<sub>3</sub>) of 3-(3,4-dimethoxyphenyl)-1-(3,4,5-trimethoxyphenyl)-1*H*-1,2,4-triazole (4o):**

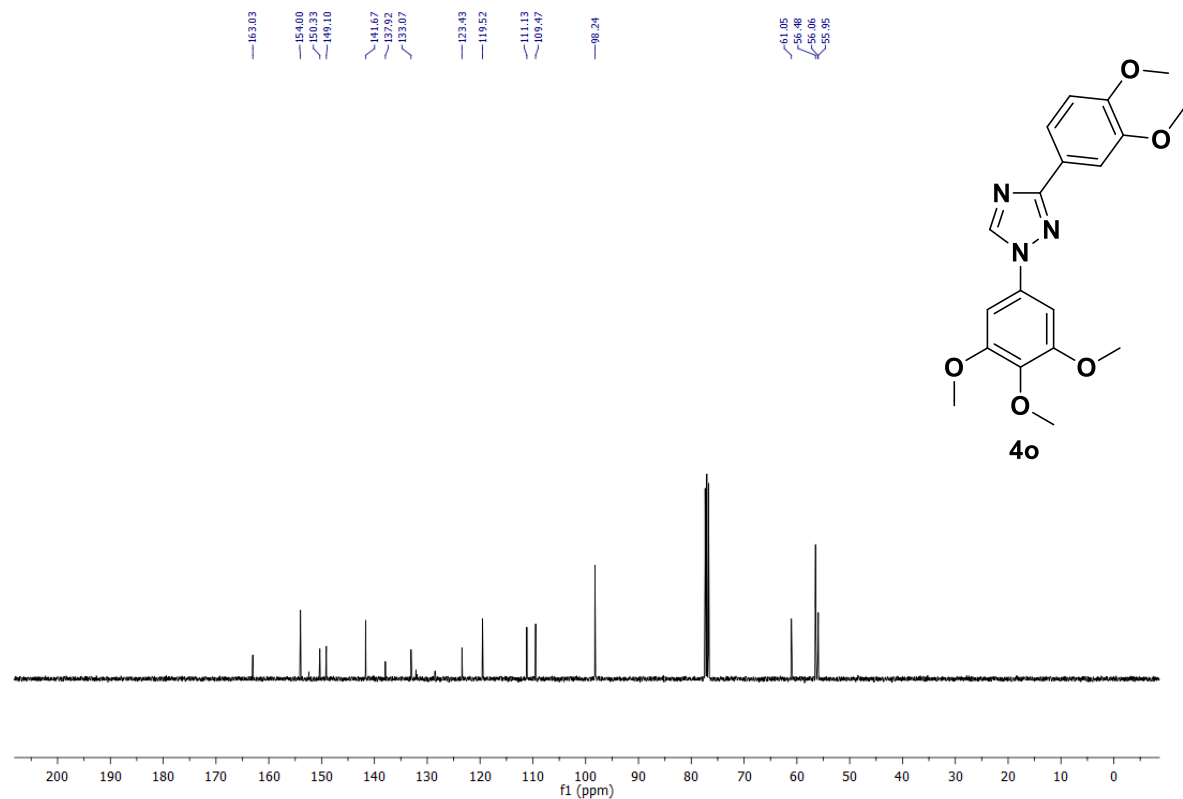

**$^1\text{H}$  NMR (400 MHz,  $\text{CDCl}_3$ ) 3-(3,4-difluorophenyl)-1-(3,4,5-trimethoxyphenyl)-1*H*-1,2,4-triazole (4p):**

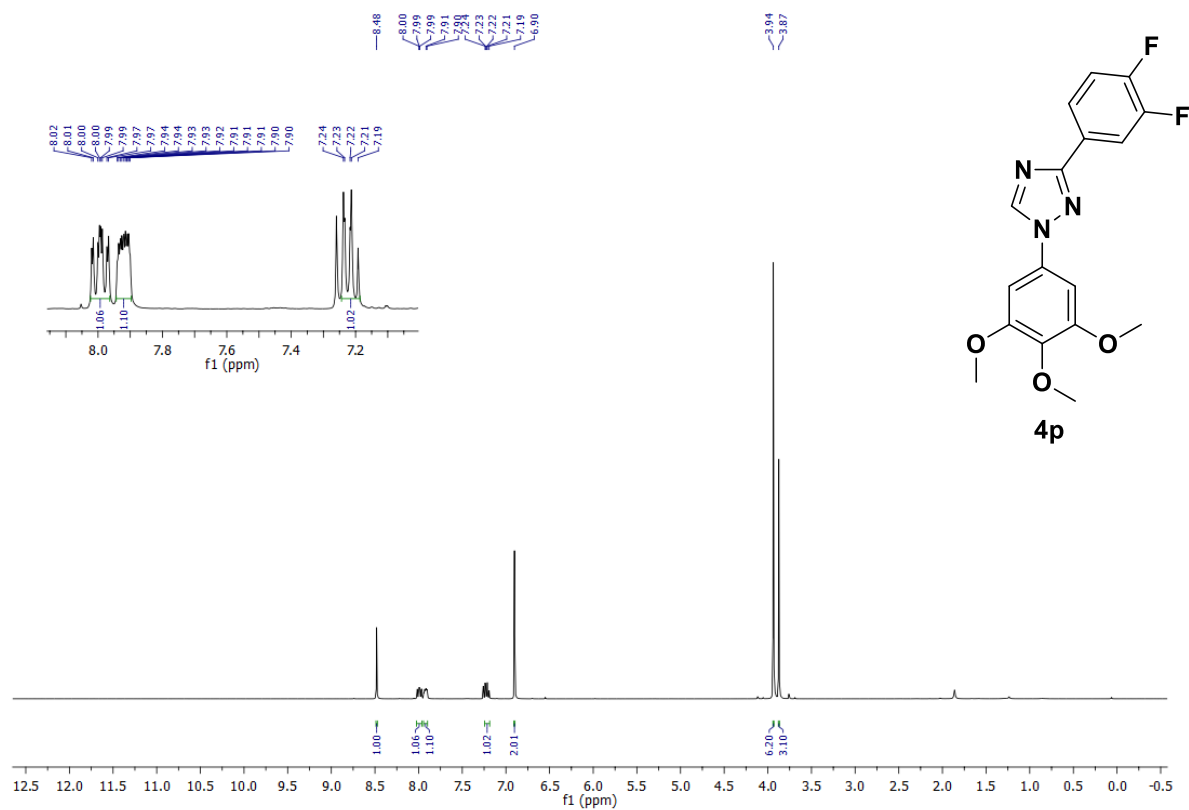

**$^{13}\text{C}\{^1\text{H}\}$  NMR (101 MHz,  $\text{CDCl}_3$ ) of 3-(3,4-difluorophenyl)-1-(3,4,5-trimethoxyphenyl)-1*H*-1,2,4-triazole (4p):**

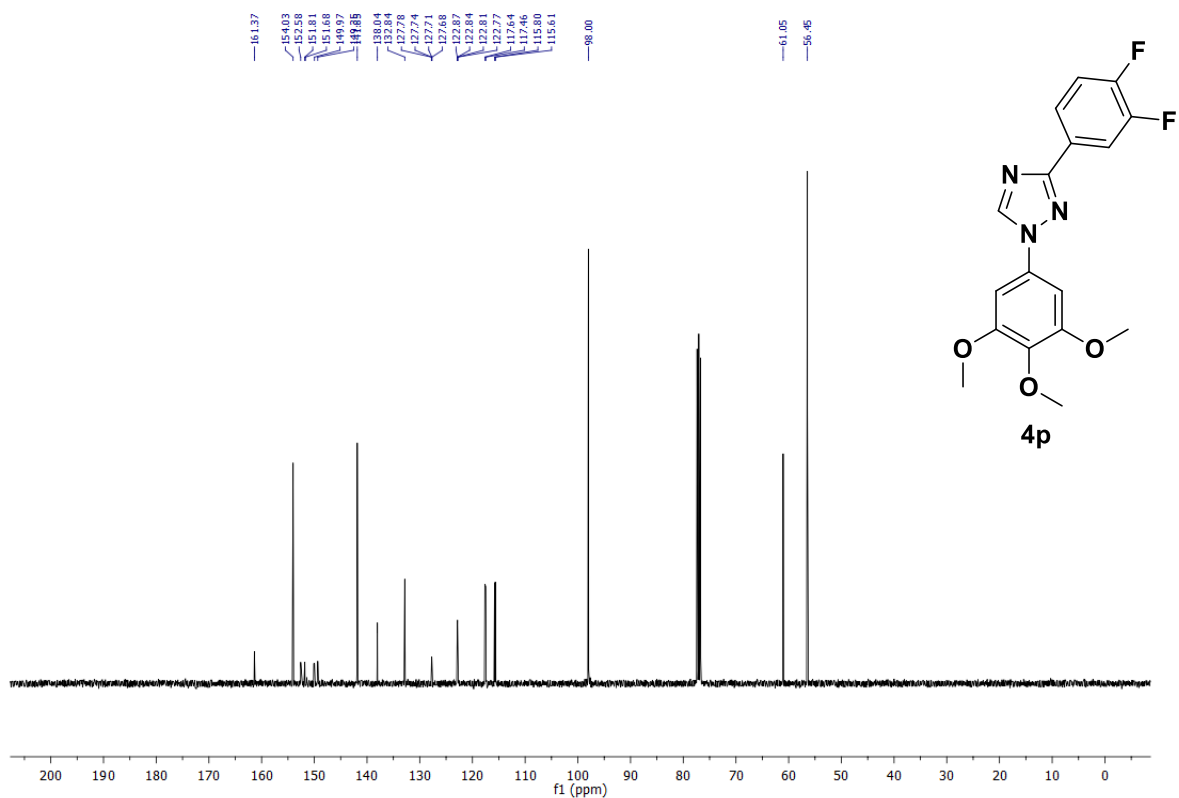

**<sup>19</sup>F NMR (377 MHz, CDCl<sub>3</sub>) of 3-(3,4-difluorophenyl)-1-(3,4,5-trimethoxyphenyl)-1H-1,2,4-triazole (4p):**

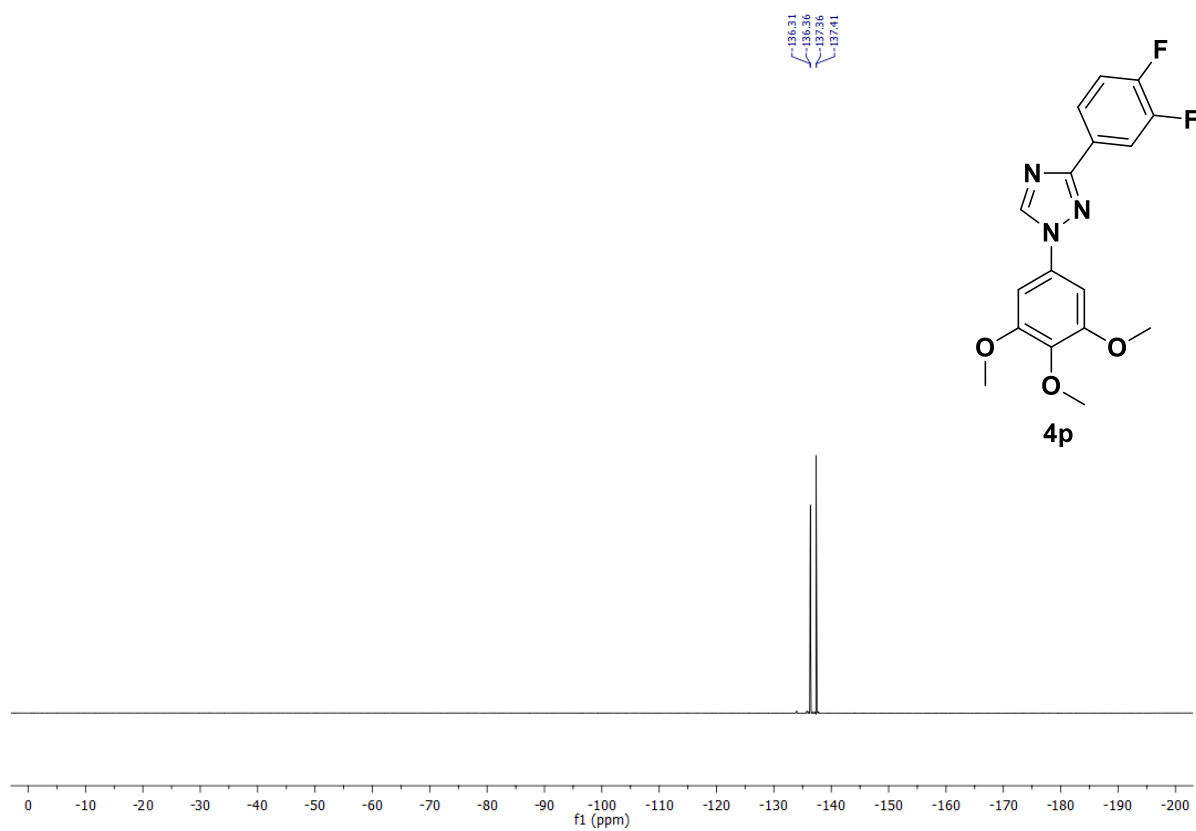

**<sup>1</sup>H NMR (400 MHz, CDCl<sub>3</sub>) of 3-(3-fluoro-4-methoxyphenyl)-1-(3,4,5-trimethoxyphenyl)-1*H*-1,2,4-triazole (4q):**

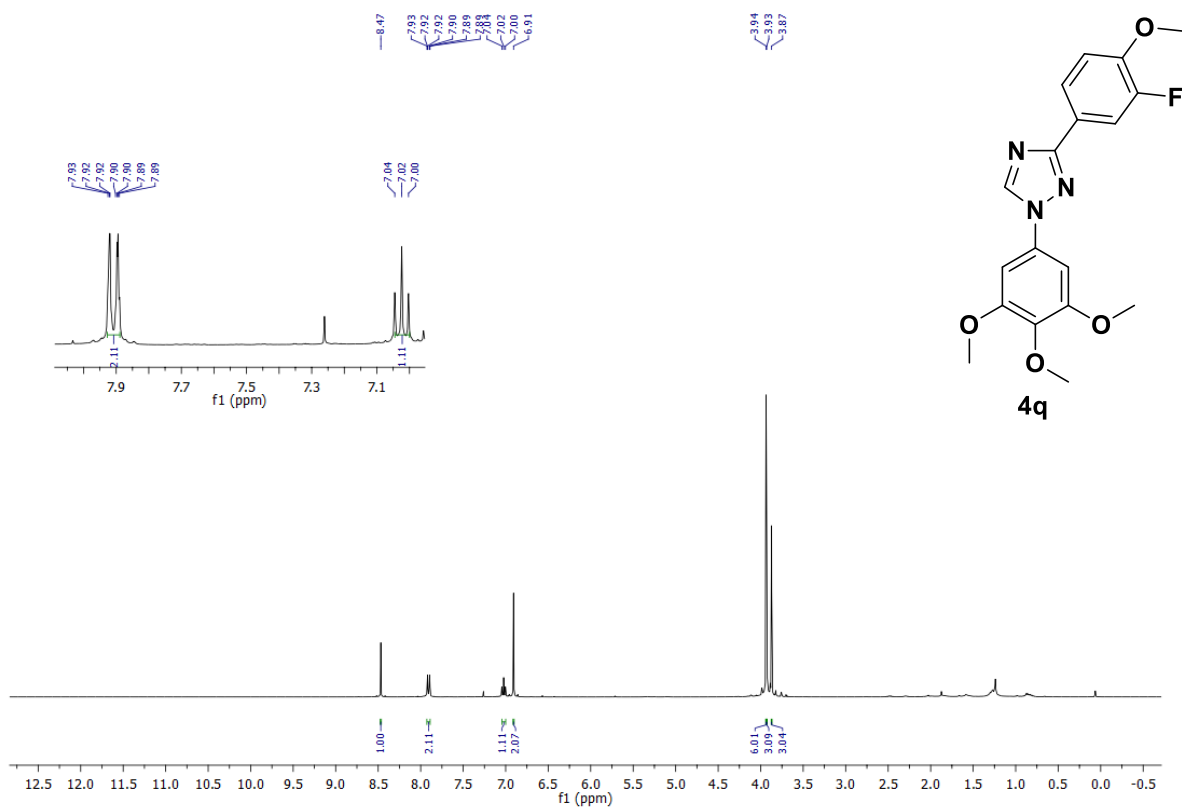

**<sup>13</sup>C{<sup>1</sup>H} NMR (101 MHz, CDCl<sub>3</sub>) of 3-(3-fluoro-4-methoxyphenyl)-1-(3,4,5-trimethoxyphenyl)-1*H*-1,2,4-triazole (4q):**

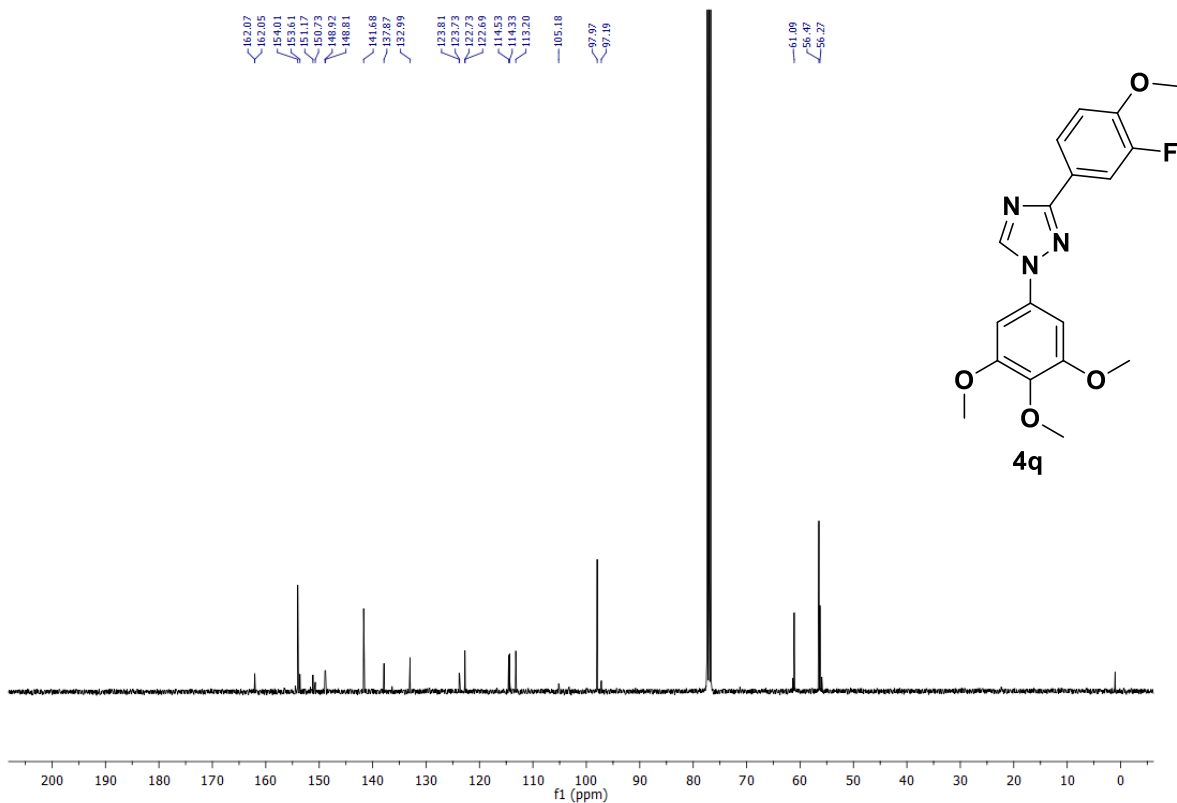

**<sup>19</sup>F NMR (377 MHz, CDCl<sub>3</sub>) of 3-(3-fluoro-4-methoxyphenyl)-1-(3,4,5-trimethoxyphenyl)-1*H*-1,2,4-triazole (4q):**

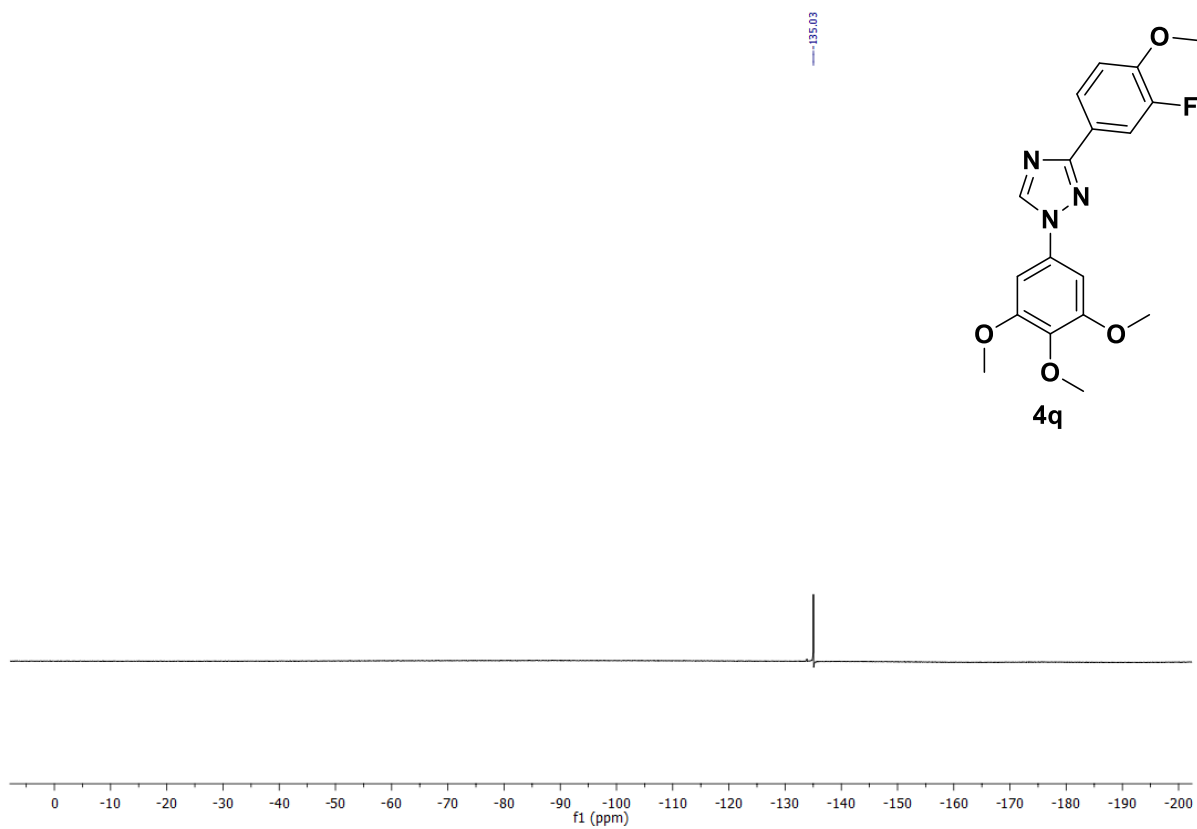

**<sup>1</sup>H NMR (400 MHz, CDCl<sub>3</sub>) 3-(3,5-dichlorophenyl)-1-(3,4,5-trimethoxyphenyl)-1*H*-1,2,4-triazole (4r):**

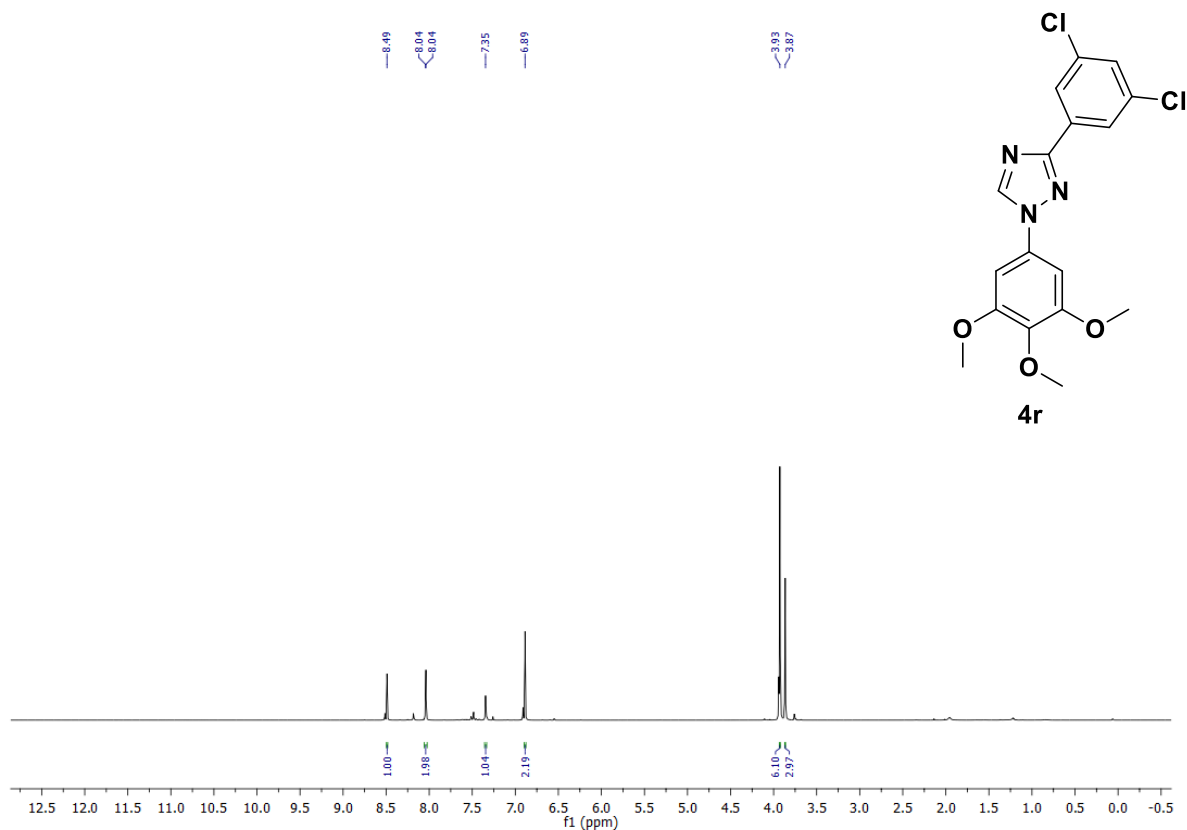

**<sup>13</sup>C{<sup>1</sup>H} NMR (101 MHz, CDCl<sub>3</sub>) of 3-(3,5-dichlorophenyl)-1-(3,4,5-trimethoxyphenyl)-1*H*-1,2,4-triazole (4r):**

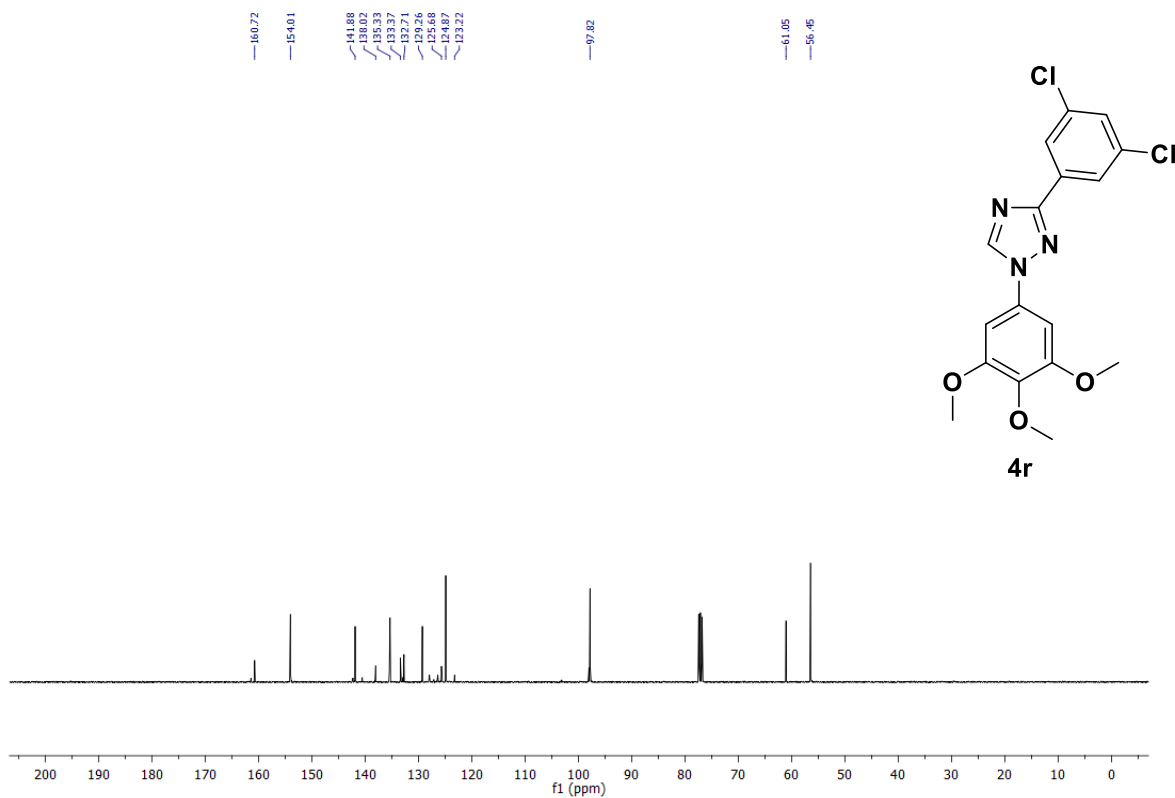



**$^1\text{H}$  NMR (400 MHz,  $\text{CDCl}_3$ ) of 2-methoxy-5-(1-(3,4,5-trimethoxyphenyl)-1H-1,2,4-triazol-3-yl)pyridine (4s):**

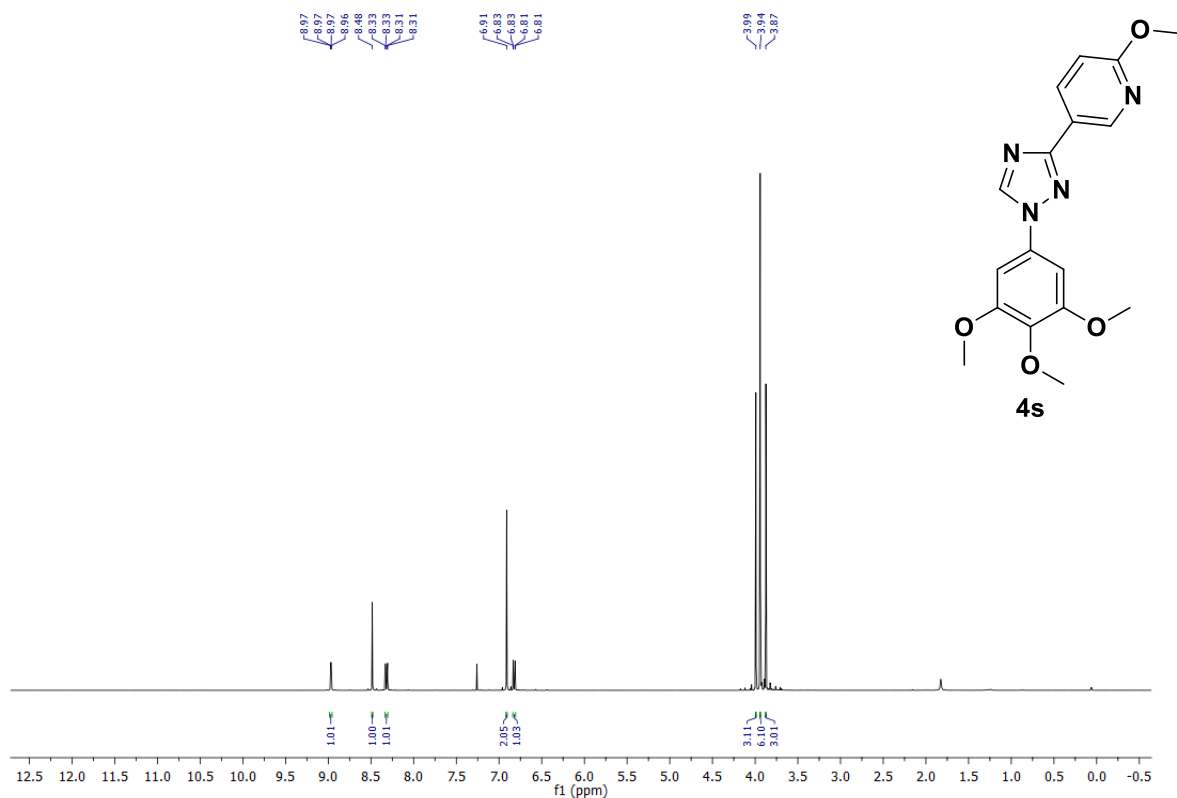

**$^{13}\text{C}\{^1\text{H}\}$  NMR (101 MHz,  $\text{CDCl}_3$ ) of 2-methoxy-5-(1-(3,4,5-trimethoxyphenyl)-1H-1,2,4-triazol-3-yl)pyridine (4s):**

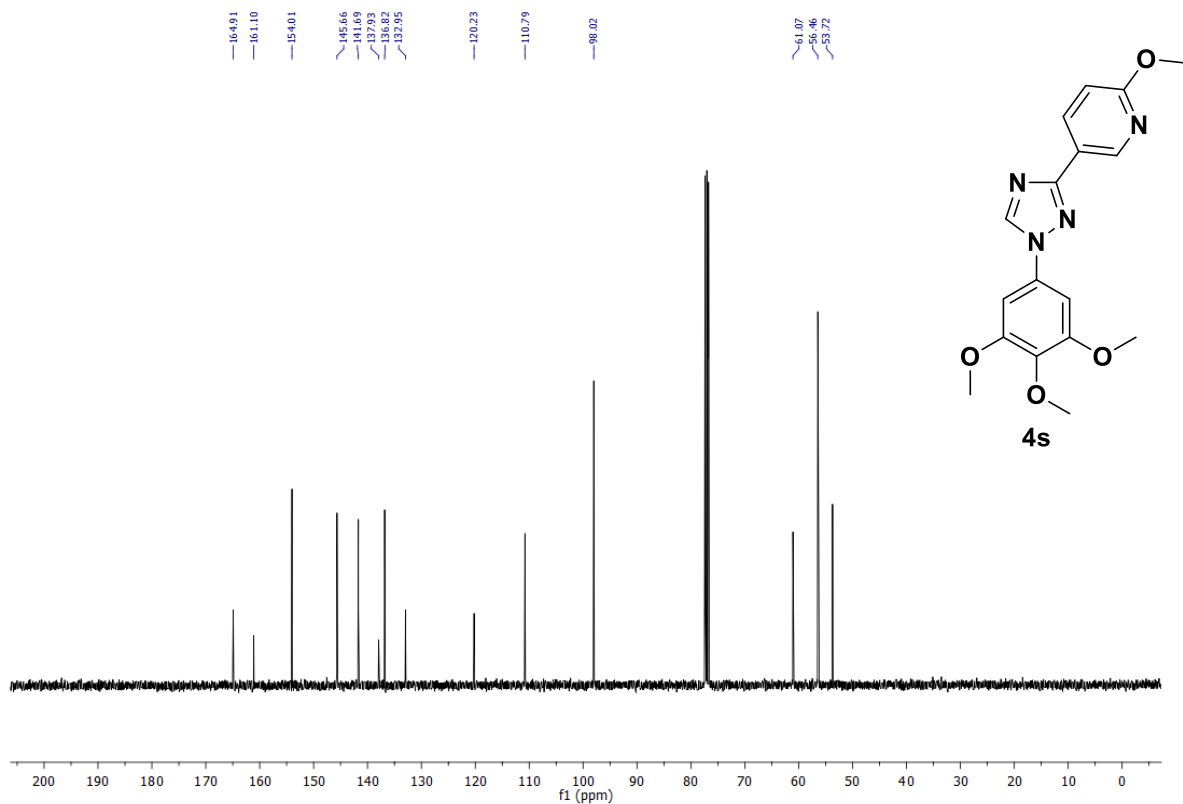

**<sup>1</sup>H NMR (400 MHz, DMSO-*d*<sub>6</sub>) 6-(1-(3,4,5-trimethoxyphenyl)-1*H*-1,2,4-triazol-3-yl)-1*H*-benzo[*d*]imidazole (4t):**

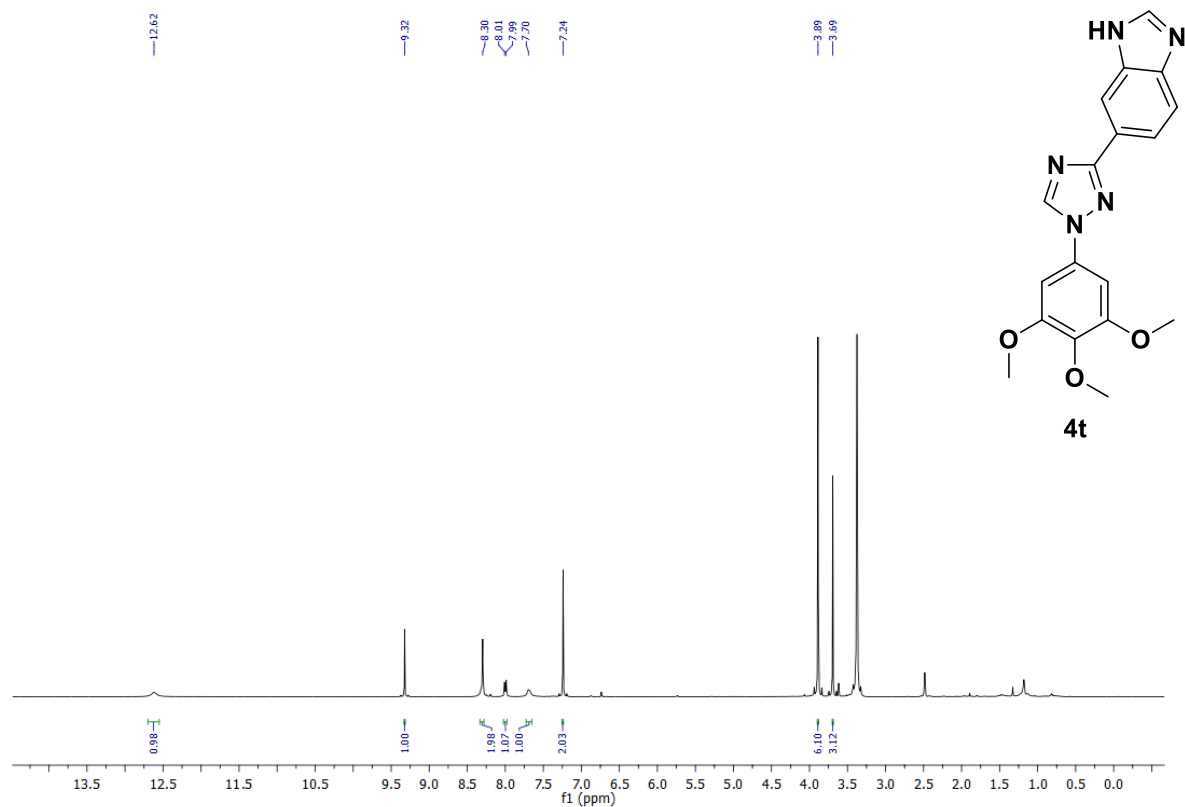

**<sup>13</sup>C{<sup>1</sup>H} NMR (101 MHz, DMSO-*d*<sub>6</sub>) of 6-(1-(3,4,5-trimethoxyphenyl)-1*H*-1,2,4-triazol-3-yl)-1*H*-benzo[*d*]imidazole (4t):**

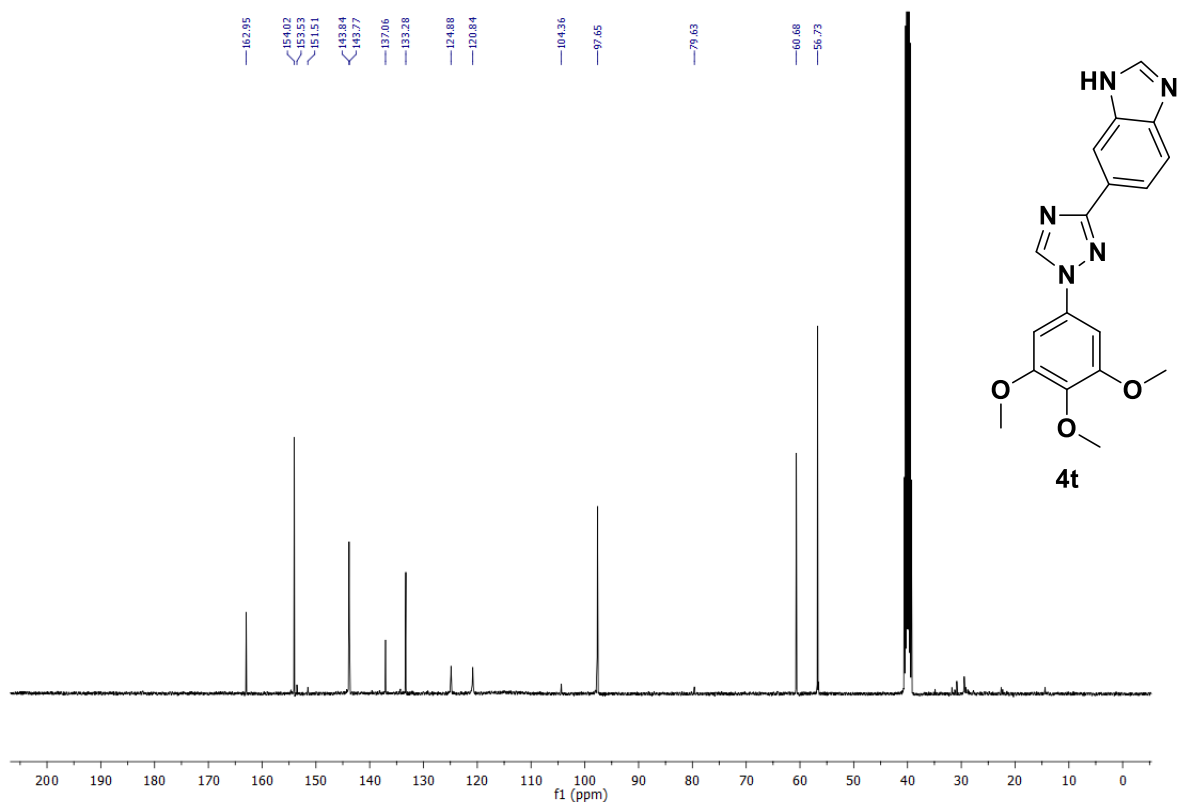

**<sup>1</sup>H NMR (400 MHz, CDCl<sub>3</sub>) 3-(naphthalen-1-yl)-1-(3,4,5-trimethoxyphenyl)-1*H*-1,2,4-triazole (4u):**

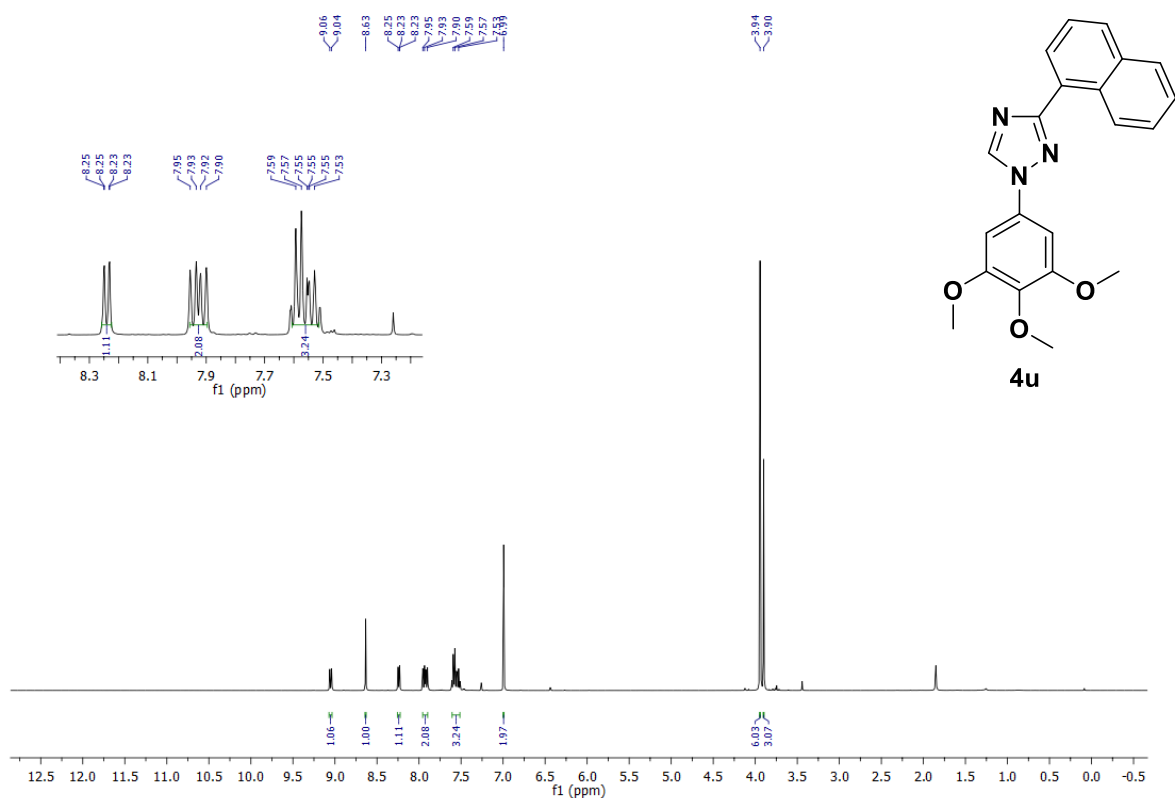

**<sup>13</sup>C{<sup>1</sup>H} NMR (101 MHz, CDCl<sub>3</sub>) of 3-(naphthalen-1-yl)-1-(3,4,5-trimethoxyphenyl)-1*H*-1,2,4-triazole (4u):**

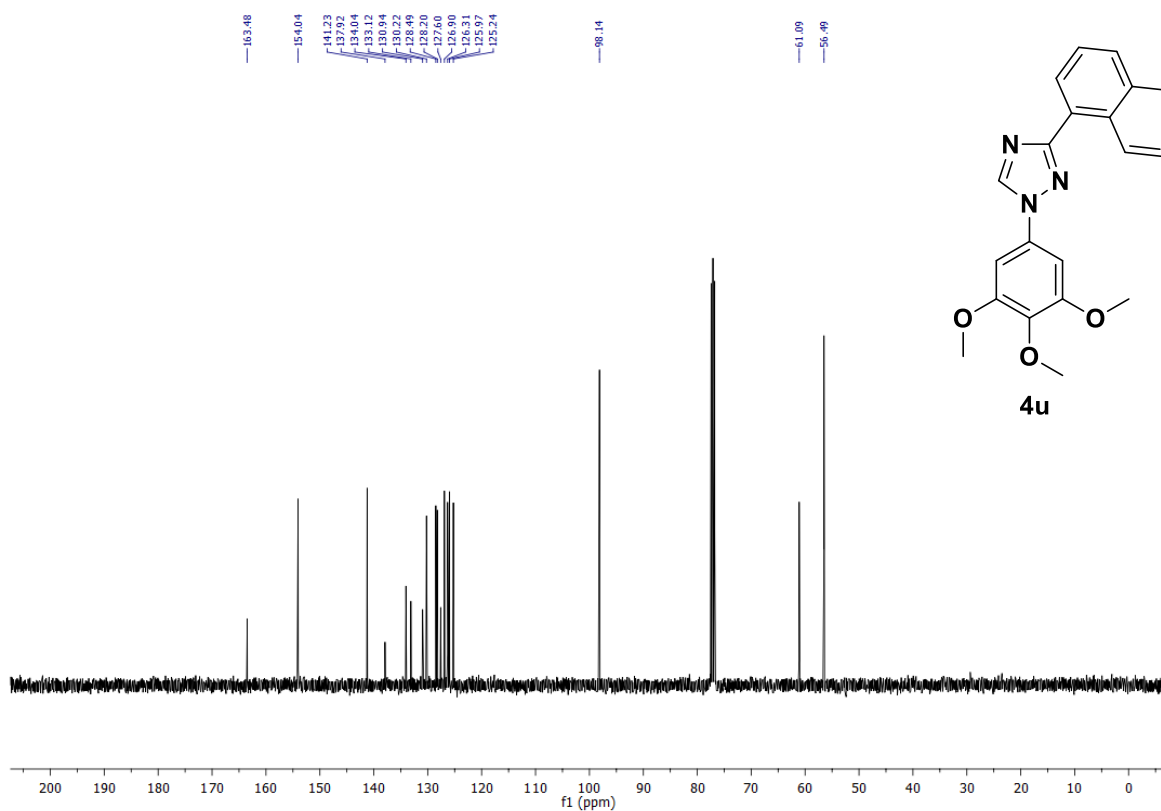

**<sup>1</sup>H NMR (400 MHz, CDCl<sub>3</sub>) of 3-(benzo[d][1,3]dioxol-5-yl)-1-(3,4,5-trimethoxyphenyl)-1H-1,2,4-triazole (4v):**

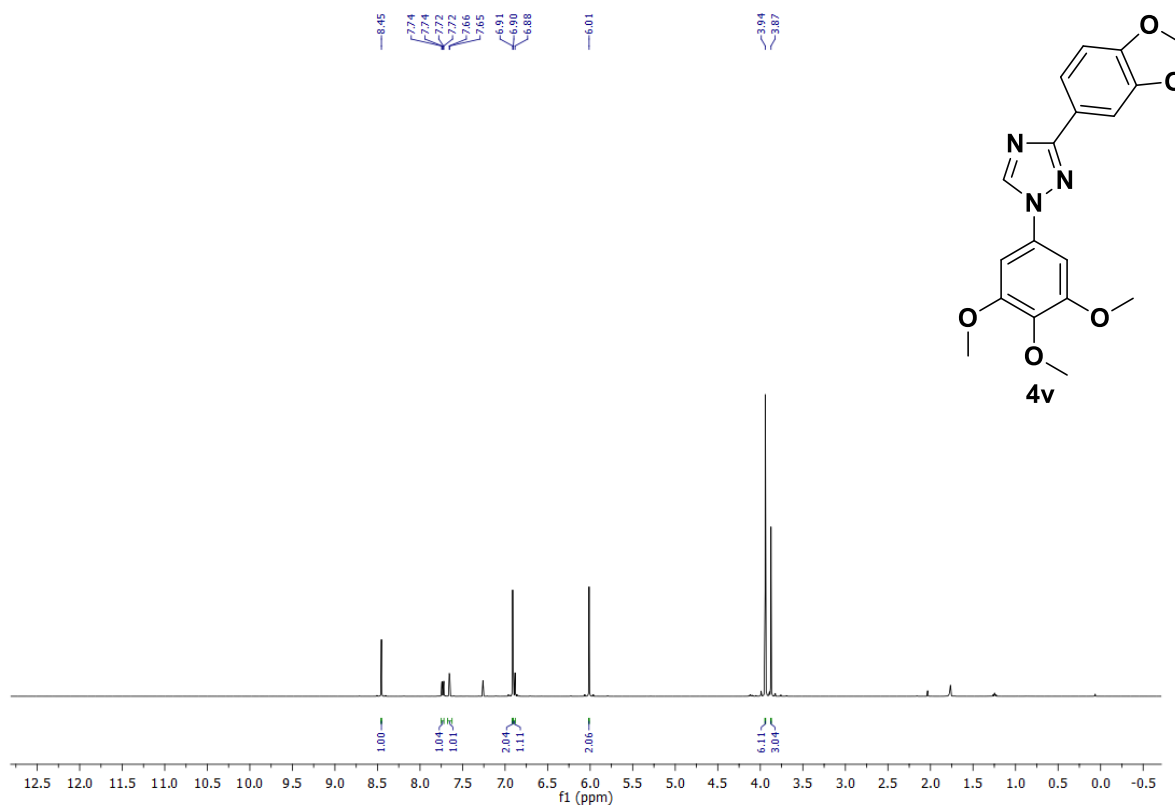

**<sup>13</sup>C{<sup>1</sup>H} NMR (101 MHz, CDCl<sub>3</sub>) of 3-(benzo[d][1,3]dioxol-5-yl)-1-(3,4,5-trimethoxyphenyl)-1H-1,2,4-triazole (4v):**

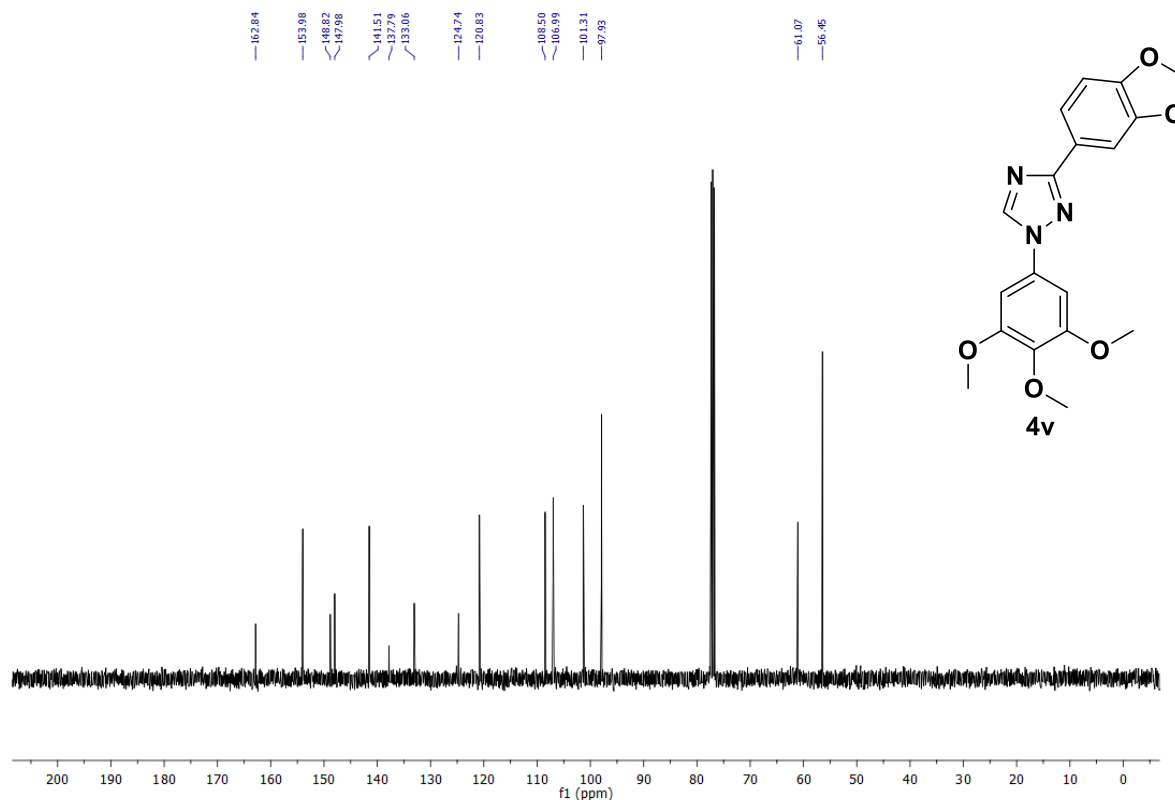

Supplement: d4md00285g1.pdf [file d4md00285g1.pdf]
